# Supplementary material for: Differential Type-I Interferon Response in Buffy Coat Transcriptome of Individuals Infected with SARS-CoV-2 Gamma and Delta Variants
Source: MDPI journal article supplement (doi:10.3390/ijms241713146), 2023-08-24
Supplement: s1 [file s1]

**SupplementaryFigure S1.** Differentially expressed genes present in the KEGG SARS-CoV-2 pathway for Gamma (P1) and Delta transcriptomes. Genes in green are upregulated and in red are downregulated.

**Supplementary Table 1.** GO enriched terms for biological processes in Delta transcriptome.

**Supplementary Table 2.** GO enriched terms for biological processes in Gamma transcriptome.

**Supplementary Table 3.** Upregulated differentially expressed genes in Delta transcriptome.

**Supplementary Table 4.** Downregulated differentially expressed genes in Delta transcriptome.

**Supplementary Table 5.** Upregulated differentially expressed genes in Gamma transcriptome.

**Supplementary Table 6.** Downregulated differentially expressed genes in Gamma transcriptome.
