# Supplementary material for: Differential Type-I Interferon Response in Buffy Coat Transcriptome of Individuals Infected with SARS-CoV-2 Gamma and Delta Variants
Source: Int J Mol Sci. 2023 Aug 24;24(17):13146. doi: 10.3390/ijms241713146 (PMC10487928; doi:10.3390/ijms241713146)
Supplement: Supplementary file 1 [file ijms-24-13146-s001.zip]

Archive with 9 entries (9 files):
- Figure_S1.tiff
- Supplementary captions.pdf
- Supplementary material 1.pdf
- Supplementary table 1.xlsx
- Supplementary table 2.xlsx
- Supplementary table 3.xlsx
- Supplementary table 4.xlsx
- Supplementary table 5.xlsx
- Supplementary table 6.xlsx
