# Supplementary material for: Differential Type-I Interferon Response in Buffy Coat Transcriptome of Individuals Infected with SARS-CoV-2 Gamma and Delta Variants
Source: Int J Mol Sci. 2023 Aug 24;24(17):13146. doi: 10.3390/ijms241713146 (PMC10487928; doi:10.3390/ijms241713146)
Supplement: Supplementary file 1 [file ijms-24-13146-s001.zip › Supplementary table 1.xlsx]

## Sheet: GO Delta
Supplementary Table 1. GO enriched terms for biological processes in Delta trancriptome.
genes	GOID	Found	Size	FDR	GO Name	GO Description
ENSG00000008438, ENSG00000055332, ENSG00000068079, ENSG00000078081, ENSG00000089127, ENSG00000089692, ENSG00000100298, ENSG00000101782, ENSG00000104951, ENSG00000106785, ENSG00000107201, ENSG00000108771, ENSG00000111331, ENSG00000111335, ENSG00000115267, ENSG00000117226, ENSG00000117228, ENSG00000119917, ENSG00000119922, ENSG00000123838, ENSG00000124256, ENSG00000126709, ENSG00000130303, ENSG0000…	GO:0002376	96	1215	0	immune system process	Any process involved in the development or functioning of the immune system, an organismal system for calibrated responses to potential internal or invasive threats. [GO_REF:0000022, GOC:add]
ENSG00000008438, ENSG00000055332, ENSG00000068079, ENSG00000089127, ENSG00000100298, ENSG00000101782, ENSG00000106785, ENSG00000107201, ENSG00000108771, ENSG00000111331, ENSG00000111335, ENSG00000112299, ENSG00000115267, ENSG00000119917, ENSG00000119922, ENSG00000121236, ENSG00000123838, ENSG00000124102, ENSG00000124256, ENSG00000126709, ENSG00000129472, ENSG00000130303, ENSG00000130813, ENSG0000…	GO:0045087	73	799	0	innate immune response	Innate immune responses are defense responses mediated by germline encoded components that directly recognize components of potential pathogens. [GO_REF:0000022, GOC:add, GOC:ebc, GOC:mtg_sensu]
ENSG00000018280, ENSG00000108691, ENSG00000108700, ENSG00000115590, ENSG00000115594, ENSG00000116690, ENSG00000121797, ENSG00000121858, ENSG00000126709, ENSG00000128342, ENSG00000132274, ENSG00000135047, ENSG00000136689, ENSG00000137959, ENSG00000137965, ENSG00000140443, ENSG00000142089, ENSG00000159189, ENSG00000160791, ENSG00000163736, ENSG00000164342, ENSG00000165406, ENSG00000169245, ENSG0000…	GO:0006955	56	785	0	immune response	Any immune system process that functions in the calibrated response of an organism to a potential internal or invasive threat. [GO_REF:0000022, GOC:add]
ENSG00000055332, ENSG00000089127, ENSG00000100298, ENSG00000101782, ENSG00000104765, ENSG00000107201, ENSG00000108771, ENSG00000111331, ENSG00000111335, ENSG00000115267, ENSG00000117226, ENSG00000117228, ENSG00000119917, ENSG00000119922, ENSG00000122643, ENSG00000124256, ENSG00000126709, ENSG00000129472, ENSG00000130303, ENSG00000130813, ENSG00000132256, ENSG00000132274, ENSG00000134321, ENSG0000…	GO:0051607	48	243	0	defense response to virus	Reactions triggered in response to the presence of a virus that act to protect the cell or organism. [GOC:ai]
ENSG00000078081, ENSG00000089692, ENSG00000104951, ENSG00000135047, ENSG00000142512, ENSG00000164308, ENSG00000165406, ENSG00000197646, ENSG00000211611, ENSG00000211640, ENSG00000211642, ENSG00000211644, ENSG00000211648, ENSG00000211649, ENSG00000211653, ENSG00000211660, ENSG00000211662, ENSG00000211663, ENSG00000211664, ENSG00000211666, ENSG00000211668, ENSG00000211669, ENSG00000211670, ENSG0000…	GO:0002250	46	733	6.5e-05	adaptive immune response	An immune response mediated by cells expressing specific receptors for antigen produced through a somatic diversification process, and allowing for an enhanced secondary response to subsequent exposures to the same antigen (immunological memory). [GO_REF:0000022, GOC:add, ISBN:0781735149]
ENSG00000008438, ENSG00000018280, ENSG00000089127, ENSG00000111331, ENSG00000111335, ENSG00000124635, ENSG00000154736, ENSG00000163736, ENSG00000164342, ENSG00000187608, ENSG00000211677, ENSG00000211893, ENSG00000211895, ENSG00000211896, ENSG00000211934, ENSG00000211945, ENSG00000211946, ENSG00000211947, ENSG00000211949, ENSG00000211955, ENSG00000211956, ENSG00000211967, ENSG00000211972, ENSG0000…	GO:0042742	30	345	4e-06	defense response to bacterium	Reactions triggered in response to the presence of a bacterium that act to protect the cell or organism. [GOC:jl]
ENSG00000008516, ENSG00000018280, ENSG00000073756, ENSG00000088827, ENSG00000108691, ENSG00000108700, ENSG00000112299, ENSG00000115594, ENSG00000115884, ENSG00000118785, ENSG00000121797, ENSG00000131471, ENSG00000133048, ENSG00000134198, ENSG00000136689, ENSG00000157404, ENSG00000160791, ENSG00000163736, ENSG00000164251, ENSG00000164342, ENSG00000167601, ENSG00000169245, ENSG00000169248, ENSG0000…	GO:0006954	28	490	0.010401	inflammatory response	The immediate defensive reaction (by vertebrate tissue) to infection or injury caused by chemical or physical agents. The process is characterized by local vasodilation, extravasation of plasma into intercellular spaces and accumulation of white blood cells and macrophages. [GO_REF:0000022, ISBN:0198506732]
ENSG00000055332, ENSG00000089127, ENSG00000106211, ENSG00000107201, ENSG00000108700, ENSG00000108771, ENSG00000111331, ENSG00000111335, ENSG00000115267, ENSG00000119917, ENSG00000119922, ENSG00000130303, ENSG00000132274, ENSG00000134321, ENSG00000135114, ENSG00000137628, ENSG00000137965, ENSG00000142089, ENSG00000157601, ENSG00000164342, ENSG00000169245, ENSG00000183486, ENSG00000185507, ENSG0000…	GO:0009615	26	133	0	response to virus	Any process that results in a change in state or activity of a cell or an organism (in terms of movement, secretion, enzyme production, gene expression, etc.) as a result of a stimulus from a virus. [GOC:hb]
ENSG00000123838, ENSG00000149131, ENSG00000159189, ENSG00000166278, ENSG00000173369, ENSG00000211677, ENSG00000211893, ENSG00000211895, ENSG00000211896, ENSG00000211934, ENSG00000211945, ENSG00000211946, ENSG00000211947, ENSG00000211949, ENSG00000211955, ENSG00000211956, ENSG00000211967, ENSG00000211972, ENSG00000211974, ENSG00000224373, ENSG00000270550, ENSG00000275063	GO:0006958	22	173	0	complement activation, classical pathway	Any process involved in the activation of any of the steps of the classical pathway of the complement cascade which allows for the direct killing of microbes, the disposal of immune complexes, and the regulation of other immune processes. [GOC:add, ISBN:0781735149]
ENSG00000065328, ENSG00000085840, ENSG00000093009, ENSG00000094804, ENSG00000101003, ENSG00000104738, ENSG00000131153, ENSG00000140534, ENSG00000143476, ENSG00000149554, ENSG00000150594, ENSG00000160957, ENSG00000166803, ENSG00000167513, ENSG00000170312, ENSG00000171848, ENSG00000175643, ENSG00000285816	GO:0006260	18	138	1e-06	DNA replication	The cellular metabolic process in which a cell duplicates one or more molecules of DNA. DNA replication begins when specific sequences, known as origins of replication, are recognized and bound by initiation proteins, and ends when the original DNA molecule has been completely duplicated and the copies topologically separated. The unit of replication usually corresponds to the genome of the cell,…
ENSG00000004468, ENSG00000211677, ENSG00000211893, ENSG00000211895, ENSG00000211896, ENSG00000211934, ENSG00000211945, ENSG00000211946, ENSG00000211947, ENSG00000211949, ENSG00000211955, ENSG00000211956, ENSG00000211967, ENSG00000211972, ENSG00000211974, ENSG00000224373, ENSG00000270550, ENSG00000275063	GO:0050853	18	165	2.2e-05	B cell receptor signaling pathway	The series of molecular signals initiated by the cross-linking of an antigen receptor on a B cell. [GOC:add]
ENSG00000008438, ENSG00000018280, ENSG00000100504, ENSG00000105974, ENSG00000108691, ENSG00000108771, ENSG00000111335, ENSG00000112773, ENSG00000113494, ENSG00000125355, ENSG00000137965, ENSG00000138642, ENSG00000169245, ENSG00000184979, ENSG00000187608, ENSG00000197272	GO:0009617	16	135	2.2e-05	response to bacterium	Any process that results in a change in state or activity of a cell or an organism (in terms of movement, secretion, enzyme production, gene expression, etc.) as a result of a stimulus from a bacterium. [GOC:hb]
ENSG00000018280, ENSG00000038945, ENSG00000105974, ENSG00000122952, ENSG00000141469, ENSG00000153208, ENSG00000165115, ENSG00000166171, ENSG00000167601	GO:0051649	9	134	0.03295	establishment of localization in cell	Any process, occuring in a cell, that localizes a substance or cellular component. This may occur via movement, tethering or selective degradation. [GOC:ai, GOC:dos, GOC:dph, GOC:tb]
ENSG00000008438, ENSG00000124635, ENSG00000163736, ENSG00000169245, ENSG00000169248, ENSG00000273802, ENSG00000274290, ENSG00000278588	GO:0061844	8	83	0.008497	antimicrobial humoral immune response mediated by antimicrobial peptide	An immune response against microbes mediated by anti-microbial peptides in body fluid. [PMID:15761415, PMID:24287494]
ENSG00000089127, ENSG00000101782, ENSG00000115267, ENSG00000121236, ENSG00000126709, ENSG00000164342, ENSG00000169245, ENSG00000196664	GO:0098586	8	80	0.01001	cellular response to virus	Any process that results in a change in state or activity of a cell (in terms of movement, secretion, enzyme production, gene expression, etc.) as a result of a stimulus from a virus. [GOC:dos]
ENSG00000092853, ENSG00000124762, ENSG00000140534, ENSG00000143476, ENSG00000149554, ENSG00000166851, ENSG00000170312	GO:0007095	7	41	0.000537	mitotic G2 DNA damage checkpoint signaling	A mitotic cell cycle checkpoint that detects and negatively regulates progression through the G2/M transition of the cell cycle in response to DNA damage. [GOC:mtg_cell_cycle, PMID:16299494]
ENSG00000124102, ENSG00000124635, ENSG00000211895, ENSG00000239951, ENSG00000273802, ENSG00000274290, ENSG00000278588	GO:0019731	7	65	0.010401	antibacterial humoral response	An immune response against bacteria mediated through a body fluid. Examples of this process are the antibacterial humoral responses in Mus musculus and Drosophila melanogaster. [GOC:go_curators, GOC:mtg_sensu]
ENSG00000071539, ENSG00000085999, ENSG00000138496, ENSG00000139618, ENSG00000146670, ENSG00000171320	GO:0006302	6	74	0.032752	double-strand break repair	The repair of double-strand breaks in DNA via homologous and nonhomologous mechanisms to reform a continuous DNA helix. [GOC:elh]
ENSG00000018280, ENSG00000130303, ENSG00000130813, ENSG00000142089, ENSG00000145335, ENSG00000185885	GO:0034341	6	29	0.000401	response to interferon-gamma	Any process that results in a change in state or activity of a cell or an organism (in terms of movement, secretion, enzyme production, gene expression, etc.) as a result of an interferon-gamma stimulus. Interferon-gamma is also known as type II interferon. [GOC:add, ISBN:0126896631, PMID:15546383]
ENSG00000055332, ENSG00000078081, ENSG00000130303, ENSG00000142089, ENSG00000183486, ENSG00000185885	GO:0035455	6	10	0	response to interferon-alpha	Any process that results in a change in state or activity of a cell or an organism (in terms of movement, secretion, enzyme production, gene expression, etc.) as a result of an interferon-alpha stimulus. Interferon-alpha is a type I interferon. [GOC:sl, PMID:11356686]
ENSG00000130303, ENSG00000130813, ENSG00000132530, ENSG00000142089, ENSG00000185885, ENSG00000188313	GO:0035456	6	10	0	response to interferon-beta	Any process that results in a change in state or activity of a cell or an organism (in terms of movement, secretion, enzyme production, gene expression, etc.) as a result of an interferon-beta stimulus. Interferon-beta is a type I interferon. [GOC:sl, PMID:9561374]
ENSG00000065328, ENSG00000085840, ENSG00000093009, ENSG00000094804, ENSG00000104738	GO:0006270	5	28	0.002581	DNA replication initiation	The process in which DNA-dependent DNA replication is started; this begins with the ATP dependent loading of an initiator complex onto the DNA, this is followed by DNA melting and helicase activity. In bacteria, the gene products that enable the helicase activity are loaded after the initial melting and in archaea and eukaryotes, the gene products that enable the helicase activity are inactive wh…
ENSG00000004468, ENSG00000105974, ENSG00000125740, ENSG00000140526, ENSG00000176890	GO:0032570	5	32	0.005044	response to progesterone	Any process that results in a change in state or activity of a cell or an organism (in terms of movement, secretion, enzyme production, gene expression, etc.) as a result of a progesterone stimulus. [GOC:sl]
ENSG00000089127, ENSG00000119917, ENSG00000119922, ENSG00000167601, ENSG00000183087	GO:0035457	5	25	0.00143	cellular response to interferon-alpha	Any process that results in a change in state or activity of a cell (in terms of movement, secretion, enzyme production, gene expression, etc.) as a result of an interferon-alpha stimulus. Interferon-alpha is a type I interferon. [GOC:sl]
ENSG00000112096, ENSG00000115884, ENSG00000119782, ENSG00000121691, ENSG00000170312	GO:0042542	5	47	0.016533	response to hydrogen peroxide	Any process that results in a change in state or activity of a cell or an organism (in terms of movement, secretion, enzyme production, gene expression, etc.) as a result of a hydrogen peroxide (H2O2) stimulus. [GOC:jl]
ENSG00000125148, ENSG00000163666, ENSG00000169715, ENSG00000187193, ENSG00000198417	GO:0071276	5	40	0.010257	cellular response to cadmium ion	Any process that results in a change in state or activity of a cell (in terms of movement, secretion, enzyme production, gene expression, etc.) as a result of a cadmium (Cd) ion stimulus. [GOC:mah]
ENSG00000125148, ENSG00000145335, ENSG00000169715, ENSG00000187193, ENSG00000198417	GO:0071280	5	31	0.004288	cellular response to copper ion	Any process that results in a change in state or activity of a cell (in terms of movement, secretion, enzyme production, gene expression, etc.) as a result of a copper ion stimulus. [GOC:mah]
ENSG00000105974, ENSG00000107201, ENSG00000115267, ENSG00000164342, ENSG00000185745	GO:0071360	5	24	0.001135	cellular response to exogenous dsRNA	Any process that results in a change in state or activity of a cell (in terms of movement, secretion, enzyme production, gene expression, etc.) as a result of an exogenous double-stranded RNA stimulus. [GOC:mah]
ENSG00000059378, ENSG00000111224, ENSG00000138496, ENSG00000173193, ENSG00000178685	GO:0140289	5	12	1.4e-05	protein mono-ADP-ribosylation	The transfer, from NAD, of a single (mono) ADP-ribose molecule to protein amino acids. [PMID:25043379]
ENSG00000089127, ENSG00000107201, ENSG00000157601, ENSG00000169245, ENSG00000185745	GO:0140374	5	22	0.000691	antiviral innate immune response	A defense response against viruses mediated through an innate immune response. An innate immune response is mediated by germline encoded components that directly recognize components of potential pathogens. [PMID:31006531]
ENSG00000124635, ENSG00000273802, ENSG00000274290, ENSG00000278588	GO:0002227	4	34	0.019139	innate immune response in mucosa	Any process of the innate immune response that takes place in the mucosal tissues. [GOC:add, PMID:10719665, PMID:15971105]
ENSG00000134690, ENSG00000142945, ENSG00000146670, ENSG00000237649	GO:0007080	4	46	0.041043	mitotic metaphase plate congression	The cell cycle process in which chromosomes are aligned at the metaphase plate, a plane halfway between the poles of the mitotic spindle, during mitosis. [GOC:mah, ISBN:0815316194]
ENSG00000073756, ENSG00000113494, ENSG00000118785, ENSG00000128342	GO:0007566	4	40	0.030735	embryo implantation	Attachment of the blastocyst to the uterine lining. [GOC:isa_complete, http://www.medterms.com]
ENSG00000112096, ENSG00000121691, ENSG00000170312, ENSG00000284194	GO:0014823	4	44	0.03892	response to activity	Any process that results in a change in state or activity of a cell or an organism (in terms of movement, secretion, enzyme production, gene expression, etc.) as a result of an activity stimulus. [GOC:mtg_muscle]
ENSG00000145386, ENSG00000167601, ENSG00000170312, ENSG00000183087	GO:0031100	4	39	0.02776	animal organ regeneration	The regrowth of a lost or destroyed animal organ. [GOC:mah]
ENSG00000089127, ENSG00000121236, ENSG00000138035, ENSG00000164342	GO:0035458	4	24	0.008685	cellular response to interferon-beta	Any process that results in a change in state or activity of a cell (in terms of movement, secretion, enzyme production, gene expression, etc.) as a result of an interferon-beta stimulus. Interferon-beta is a type I interferon. [GOC:sl]
ENSG00000124762, ENSG00000139618, ENSG00000140464, ENSG00000164054	GO:0042771	4	39	0.02776	intrinsic apoptotic signaling pathway in response to DNA damage by p53 class mediator	The series of molecular signals in which an intracellular signal is conveyed to trigger the apoptotic death of a cell. The pathway is induced by the cell cycle regulator phosphoprotein p53, or an equivalent protein, in response to the detection of DNA damage, and ends when the execution phase of apoptosis is triggered. [GOC:go_curators, GOC:mtg_apoptosis]
ENSG00000018280, ENSG00000162654, ENSG00000168062, ENSG00000172331	GO:0042832	4	28	0.011026	defense response to protozoan	Reactions triggered in response to the presence of a protozoan that act to protect the cell or organism. [GOC:jl]
ENSG00000112096, ENSG00000121691, ENSG00000157404, ENSG00000170312	GO:0046686	4	23	0.007212	response to cadmium ion	Any process that results in a change in state or activity of a cell or an organism (in terms of movement, secretion, enzyme production, gene expression, etc.) as a result of a cadmium (Cd) ion stimulus. [GOC:ai]
ENSG00000115884, ENSG00000125740, ENSG00000138035, ENSG00000178726	GO:0051591	4	38	0.025284	response to cAMP	Any process that results in a change in state or activity of a cell or an organism (in terms of movement, secretion, enzyme production, gene expression, etc.) as a result of a cAMP (cyclic AMP, adenosine 3',5'-cyclophosphate) stimulus. [GOC:ai]
ENSG00000004468, ENSG00000115594, ENSG00000133048, ENSG00000145335	GO:0070555	4	36	0.023823	response to interleukin-1	Any process that results in a change in state or activity of a cell or an organism (in terms of movement, secretion, enzyme production, gene expression, etc.) as a result of an interleukin-1 stimulus. [GOC:BHF, GOC:mah]
ENSG00000125148, ENSG00000169715, ENSG00000187193, ENSG00000198417	GO:0071248	4	16	0.001415	cellular response to metal ion	Any process that results in a change in state or activity of a cell (in terms of movement, secretion, enzyme production, gene expression, etc.) as a result of a metal ion stimulus. [GOC:mah]
ENSG00000125148, ENSG00000169715, ENSG00000187193, ENSG00000198417	GO:0071294	4	23	0.007212	cellular response to zinc ion	Any process that results in a change in state or activity of a cell (in terms of movement, secretion, enzyme production, gene expression, etc.) as a result of a zinc ion stimulus. [GOC:mah]
ENSG00000124098, ENSG00000140443, ENSG00000145386, ENSG00000278195	GO:0071392	4	40	0.030735	cellular response to estradiol stimulus	Any process that results in a change in state or activity of a cell (in terms of movement, secretion, enzyme production, gene expression, etc.) as a result of stimulus by estradiol, a C18 steroid hormone hydroxylated at C3 and C17 that acts as a potent estrogen. [GOC:mah]
ENSG00000118689, ENSG00000133216, ENSG00000140443, ENSG00000141837	GO:1904646	4	46	0.041043	cellular response to amyloid-beta	Any process that results in a change in state or activity of a cell (in terms of movement, secretion, enzyme production, gene expression, etc.) as a result of a amyloid-beta stimulus. [GO_REF:0000071, GOC:TermGenie, PMID:23555824]
