# Supplementary material for: Differential Type-I Interferon Response in Buffy Coat Transcriptome of Individuals Infected with SARS-CoV-2 Gamma and Delta Variants
Source: Int J Mol Sci. 2023 Aug 24;24(17):13146. doi: 10.3390/ijms241713146 (PMC10487928; doi:10.3390/ijms241713146)
Supplement: Supplementary file 1 [file ijms-24-13146-s001.zip › Supplementary table 2.xlsx]

## Sheet: GO Gamma
Supplementary Table 2. GO enriched terms for biological processes in Gamma trancriptome.
genes	GOID	Found	Size	FDR	GO Name	GO Description
ENSG00000008438, ENSG00000089127, ENSG00000089692, ENSG00000091106, ENSG00000100298, ENSG00000101782, ENSG00000104951, ENSG00000105609, ENSG00000108771, ENSG00000111331, ENSG00000111335, ENSG00000123838, ENSG00000126709, ENSG00000131203, ENSG00000131981, ENSG00000134321, ENSG00000135114, ENSG00000142512, ENSG00000150337, ENSG00000157601, ENSG00000159189, ENSG00000159674, ENSG00000163221, ENSG0000…	GO:0002376	97	1215	0	immune system process	Any process involved in the development or functioning of the immune system, an organismal system for calibrated responses to potential internal or invasive threats. [GO_REF:0000022, GOC:add]
ENSG00000089692, ENSG00000104951, ENSG00000105609, ENSG00000142512, ENSG00000165406, ENSG00000174837, ENSG00000211599, ENSG00000211611, ENSG00000211625, ENSG00000211637, ENSG00000211639, ENSG00000211640, ENSG00000211644, ENSG00000211648, ENSG00000211649, ENSG00000211650, ENSG00000211652, ENSG00000211653, ENSG00000211658, ENSG00000211659, ENSG00000211660, ENSG00000211662, ENSG00000211663, ENSG0000…	GO:0002250	69	733	0	adaptive immune response	An immune response mediated by cells expressing specific receptors for antigen produced through a somatic diversification process, and allowing for an enhanced secondary response to subsequent exposures to the same antigen (immunological memory). [GO_REF:0000022, GOC:add, ISBN:0781735149]
ENSG00000081041, ENSG00000105697, ENSG00000108691, ENSG00000125538, ENSG00000126709, ENSG00000137959, ENSG00000137965, ENSG00000150337, ENSG00000152207, ENSG00000159189, ENSG00000163736, ENSG00000165406, ENSG00000174130, ENSG00000196083, ENSG00000211599, ENSG00000211611, ENSG00000211625, ENSG00000211637, ENSG00000211639, ENSG00000211640, ENSG00000211644, ENSG00000211648, ENSG00000211649, ENSG0000…	GO:0006955	61	785	0	immune response	Any immune system process that functions in the calibrated response of an organism to a potential internal or invasive threat. [GO_REF:0000022, GOC:add]
ENSG00000008438, ENSG00000089127, ENSG00000091106, ENSG00000100298, ENSG00000101213, ENSG00000101782, ENSG00000108771, ENSG00000111331, ENSG00000111335, ENSG00000123838, ENSG00000126709, ENSG00000129472, ENSG00000131981, ENSG00000134321, ENSG00000135114, ENSG00000142512, ENSG00000150337, ENSG00000157601, ENSG00000159189, ENSG00000159674, ENSG00000162722, ENSG00000163221, ENSG00000165949, ENSG0000…	GO:0045087	60	799	0	innate immune response	Innate immune responses are defense responses mediated by germline encoded components that directly recognize components of potential pathogens. [GO_REF:0000022, GOC:add, GOC:ebc, GOC:mtg_sensu]
ENSG00000008438, ENSG00000089127, ENSG00000091106, ENSG00000105697, ENSG00000111331, ENSG00000111335, ENSG00000150337, ENSG00000159674, ENSG00000163221, ENSG00000163736, ENSG00000167914, ENSG00000174130, ENSG00000187608, ENSG00000211677, ENSG00000211890, ENSG00000211892, ENSG00000211893, ENSG00000211895, ENSG00000211896, ENSG00000211938, ENSG00000211941, ENSG00000211942, ENSG00000211945, ENSG0000…	GO:0042742	43	345	0	defense response to bacterium	Reactions triggered in response to the presence of a bacterium that act to protect the cell or organism. [GOC:jl]
ENSG00000123838, ENSG00000159189, ENSG00000166278, ENSG00000203710, ENSG00000211677, ENSG00000211890, ENSG00000211892, ENSG00000211893, ENSG00000211895, ENSG00000211896, ENSG00000211938, ENSG00000211941, ENSG00000211942, ENSG00000211945, ENSG00000211946, ENSG00000211947, ENSG00000211949, ENSG00000211950, ENSG00000211951, ENSG00000211955, ENSG00000211956, ENSG00000211959, ENSG00000211962, ENSG0000…	GO:0006958	32	173	0	complement activation, classical pathway	Any process involved in the activation of any of the steps of the classical pathway of the complement cascade which allows for the direct killing of microbes, the disposal of immune complexes, and the regulation of other immune processes. [GOC:add, ISBN:0781735149]
ENSG00000211677, ENSG00000211890, ENSG00000211892, ENSG00000211893, ENSG00000211895, ENSG00000211896, ENSG00000211938, ENSG00000211941, ENSG00000211942, ENSG00000211945, ENSG00000211946, ENSG00000211947, ENSG00000211949, ENSG00000211950, ENSG00000211951, ENSG00000211955, ENSG00000211956, ENSG00000211959, ENSG00000211962, ENSG00000211966, ENSG00000211968, ENSG00000211972, ENSG00000211973, ENSG0000…	GO:0050853	28	165	0	B cell receptor signaling pathway	The series of molecular signals initiated by the cross-linking of an antigen receptor on a B cell. [GOC:add]
ENSG00000089127, ENSG00000100298, ENSG00000101782, ENSG00000104765, ENSG00000108771, ENSG00000111331, ENSG00000111335, ENSG00000126709, ENSG00000129472, ENSG00000134321, ENSG00000135114, ENSG00000136514, ENSG00000137959, ENSG00000157601, ENSG00000159674, ENSG00000165949, ENSG00000168209, ENSG00000185507, ENSG00000187608, ENSG00000239839	GO:0051607	20	243	0.000319	defense response to virus	Reactions triggered in response to the presence of a virus that act to protect the cell or organism. [GOC:ai]
ENSG00000020181, ENSG00000105974, ENSG00000108691, ENSG00000113721, ENSG00000122786, ENSG00000125968, ENSG00000127329, ENSG00000133216, ENSG00000139567, ENSG00000142627, ENSG00000154188, ENSG00000163235, ENSG00000171812, ENSG00000172270, ENSG00000179915, ENSG00000214274	GO:0001525	16	269	0.019331	angiogenesis	Blood vessel formation when new vessels emerge from the proliferation of pre-existing blood vessels. [ISBN:0878932453]
ENSG00000065328, ENSG00000073111, ENSG00000085840, ENSG00000093009, ENSG00000101003, ENSG00000131153, ENSG00000140534, ENSG00000166803, ENSG00000167513, ENSG00000168496, ENSG00000170312, ENSG00000171848, ENSG00000175643	GO:0006260	13	138	0.001314	DNA replication	The cellular metabolic process in which a cell duplicates one or more molecules of DNA. DNA replication begins when specific sequences, known as origins of replication, are recognized and bound by initiation proteins, and ends when the original DNA molecule has been completely duplicated and the copies topologically separated. The unit of replication usually corresponds to the genome of the cell,…
ENSG00000073861, ENSG00000089127, ENSG00000108771, ENSG00000111331, ENSG00000111335, ENSG00000134321, ENSG00000135114, ENSG00000137965, ENSG00000157601, ENSG00000175592, ENSG00000185507, ENSG00000187608	GO:0009615	12	133	0.003152	response to virus	Any process that results in a change in state or activity of a cell or an organism (in terms of movement, secretion, enzyme production, gene expression, etc.) as a result of a stimulus from a virus. [GOC:hb]
ENSG00000008438, ENSG00000100504, ENSG00000105974, ENSG00000108691, ENSG00000108771, ENSG00000111335, ENSG00000125355, ENSG00000137965, ENSG00000138642, ENSG00000150337, ENSG00000184979, ENSG00000187608	GO:0009617	12	135	0.003612	response to bacterium	Any process that results in a change in state or activity of a cell or an organism (in terms of movement, secretion, enzyme production, gene expression, etc.) as a result of a stimulus from a bacterium. [GOC:hb]
ENSG00000008438, ENSG00000081041, ENSG00000124233, ENSG00000163221, ENSG00000163736, ENSG00000214274, ENSG00000239839, ENSG00000278588	GO:0061844	8	83	0.011134	antimicrobial humoral immune response mediated by antimicrobial peptide	An immune response against microbes mediated by anti-microbial peptides in body fluid. [PMID:15761415, PMID:24287494]
ENSG00000124233, ENSG00000211890, ENSG00000211895, ENSG00000214274, ENSG00000239839, ENSG00000239951, ENSG00000278588	GO:0019731	7	65	0.009659	antibacterial humoral response	An immune response against bacteria mediated through a body fluid. Examples of this process are the antibacterial humoral responses in Mus musculus and Drosophila melanogaster. [GOC:go_curators, GOC:mtg_sensu]
ENSG00000081041, ENSG00000108691, ENSG00000125538, ENSG00000131981, ENSG00000163221, ENSG00000163736, ENSG00000172270	GO:0030593	7	98	0.034641	neutrophil chemotaxis	The directed movement of a neutrophil cell, the most numerous polymorphonuclear leukocyte found in the blood, in response to an external stimulus, usually an infection or wounding. [GOC:jl, ISBN:0198506732]
ENSG00000112096, ENSG00000113721, ENSG00000115884, ENSG00000119782, ENSG00000121691, ENSG00000170312, ENSG00000175592	GO:0042542	7	47	0.001262	response to hydrogen peroxide	Any process that results in a change in state or activity of a cell or an organism (in terms of movement, secretion, enzyme production, gene expression, etc.) as a result of a hydrogen peroxide (H2O2) stimulus. [GOC:jl]
ENSG00000108691, ENSG00000125538, ENSG00000145386, ENSG00000162551, ENSG00000170312, ENSG00000171631, ENSG00000188906	GO:0071407	7	73	0.012333	cellular response to organic cyclic compound	Any process that results in a change in state or activity of a cell (in terms of movement, secretion, enzyme production, gene expression, etc.) as a result of an organic cyclic compound stimulus. [GOC:mah]
ENSG00000113721, ENSG00000115884, ENSG00000119121, ENSG00000121691, ENSG00000170312, ENSG00000176890	GO:0009636	6	87	0.049111	response to toxic substance	Any process that results in a change in state or activity of a cell or an organism (in terms of movement, secretion, enzyme production, gene expression, etc.) as a result of a toxic stimulus. [GOC:lr]
ENSG00000073861, ENSG00000091181, ENSG00000111249, ENSG00000123358, ENSG00000125538	GO:0071310	5	36	0.008803	cellular response to organic substance	Any process that results in a change in state or activity of a cell (in terms of movement, secretion, enzyme production, gene expression, etc.) as a result of an organic substance stimulus. [GOC:mah]
ENSG00000065328, ENSG00000073111, ENSG00000085840, ENSG00000093009	GO:0006270	4	28	0.011053	DNA replication initiation	The process in which DNA-dependent DNA replication is started; this begins with the ATP dependent loading of an initiator complex onto the DNA, this is followed by DNA melting and helicase activity. In bacteria, the gene products that enable the helicase activity are loaded after the initial melting and in archaea and eukaryotes, the gene products that enable the helicase activity are inactive wh…
ENSG00000134690, ENSG00000142945, ENSG00000146670, ENSG00000237649	GO:0007080	4	46	0.042724	mitotic metaphase plate congression	The cell cycle process in which chromosomes are aligned at the metaphase plate, a plane halfway between the poles of the mitotic spindle, during mitosis. [GOC:mah, ISBN:0815316194]
ENSG00000105697, ENSG00000159674, ENSG00000163221, ENSG00000239839	GO:0050832	4	49	0.048557	defense response to fungus	Reactions triggered in response to the presence of a fungus that act to protect the cell or organism. [GOC:ai]
ENSG00000115884, ENSG00000172270, ENSG00000175592, ENSG00000178726	GO:0051591	4	38	0.02339	response to cAMP	Any process that results in a change in state or activity of a cell or an organism (in terms of movement, secretion, enzyme production, gene expression, etc.) as a result of a cAMP (cyclic AMP, adenosine 3',5'-cyclophosphate) stimulus. [GOC:ai]
ENSG00000125148, ENSG00000163666, ENSG00000169715, ENSG00000198417	GO:0071276	4	40	0.028551	cellular response to cadmium ion	Any process that results in a change in state or activity of a cell (in terms of movement, secretion, enzyme production, gene expression, etc.) as a result of a cadmium (Cd) ion stimulus. [GOC:mah]
ENSG00000125148, ENSG00000145335, ENSG00000169715, ENSG00000198417	GO:0071280	4	31	0.016352	cellular response to copper ion	Any process that results in a change in state or activity of a cell (in terms of movement, secretion, enzyme production, gene expression, etc.) as a result of a copper ion stimulus. [GOC:mah]
