# Supplementary material for: Differential Type-I Interferon Response in Buffy Coat Transcriptome of Individuals Infected with SARS-CoV-2 Gamma and Delta Variants
Source: Int J Mol Sci. 2023 Aug 24;24(17):13146. doi: 10.3390/ijms241713146 (PMC10487928; doi:10.3390/ijms241713146)
Supplement: Supplementary file 1 [file ijms-24-13146-s001.zip › Supplementary table 3.xlsx]

## Sheet: Delta up
Supplementary Table 3. Upregulated differentially expressed genes in Delta transcriptome.				Expression
id ensembl	Gene name	Description	Gene Type	Contrast	log2fc	padj	abundance
ENSG00000002549	LAP3	leucine aminopeptidase 3	protein_coding	Delta_over_HC	2.02426429274093	3.66683205445793e-06	1310.19809427055
ENSG00000004468	CD38	CD38 molecule	protein_coding	Delta_over_HC	1.19560678274684	2.32365115088011e-06	702.568255889711
ENSG00000010030	ETV7	ETS variant transcription factor 7	protein_coding	Delta_over_HC	2.34969247858721	0.00150397581944991	167.911773902691
ENSG00000020577	SAMD4A	sterile alpha motif domain containing 4A	protein_coding	Delta_over_HC	2.18551078457007	4.71017646813758e-07	143.592835479555
ENSG00000023171	GRAMD1B	GRAM domain containing 1B	protein_coding	Delta_over_HC	1.38977320897204	4.29880281790695e-06	461.725180485203
ENSG00000035499	DEPDC1B	DEP domain containing 1B	protein_coding	Delta_over_HC	1.09862601984014	0.0153618868217909	28.1058080206342
ENSG00000038210	PI4K2B	phosphatidylinositol 4-kinase type 2 beta	protein_coding	Delta_over_HC	1.13772148433641	8.60428962146421e-06	452.610172410306
ENSG00000038945	MSR1	macrophage scavenger receptor 1	protein_coding	Delta_over_HC	1.96898962997409	0.000418740419964424	139.412108805309
ENSG00000051180	RAD51	RAD51 recombinase	protein_coding	Delta_over_HC	1.30363137698593	0.0223336311383701	14.6844468873124
ENSG00000054598	FOXC1	forkhead box C1	protein_coding	Delta_over_HC	1.73079067621772	0.0172861032093529	7.50595206220444
ENSG00000055332	EIF2AK2	eukaryotic translation initiation factor 2 alpha kinase 2	protein_coding	Delta_over_HC	1.52424685452317	0.000291686626356237	5802.93966878959
ENSG00000059378	PARP12	poly(ADP-ribose) polymerase family member 12	protein_coding	Delta_over_HC	1.8266514320235	1.37873149198081e-06	1734.50598094642
ENSG00000067221	STOML1	stomatin like 1	protein_coding	Delta_over_HC	1.17627572666716	0.000998291582647476	68.691247334904
ENSG00000068079	IFI35	interferon induced protein 35	protein_coding	Delta_over_HC	1.87752178509238	3.82927384836686e-05	669.114060617399
ENSG00000071539	TRIP13	thyroid hormone receptor interactor 13	protein_coding	Delta_over_HC	1.22215277433538	0.0129398887774426	18.0880302144397
ENSG00000075218	GTSE1	G2 and S-phase expressed 1	protein_coding	Delta_over_HC	1.35129888762071	0.000359182589205343	25.7090586537155
ENSG00000075702	WDR62	WD repeat domain 62	protein_coding	Delta_over_HC	1.03429425816625	0.00170700208732883	50.8792598619407
ENSG00000076382	SPAG5	sperm associated antigen 5	protein_coding	Delta_over_HC	1.05922460774187	0.00403903495814895	47.3492241512967
ENSG00000078081	LAMP3	lysosomal associated membrane protein 3	protein_coding	Delta_over_HC	3.09633088034018	2.5079798293635e-07	156.702982232258
ENSG00000079385	CEACAM1	CEA cell adhesion molecule 1	protein_coding	Delta_over_HC	1.41337605237442	0.0130639301021711	706.860215792148
ENSG00000088325	TPX2	TPX2 microtubule nucleation factor	protein_coding	Delta_over_HC	1.21980857291377	0.000141617742398579	100.502076790991
ENSG00000090889	KIF4A	kinesin family member 4A	protein_coding	Delta_over_HC	1.09121400082421	0.0151414790740117	32.2368892288982
ENSG00000092853	CLSPN	claspin	protein_coding	Delta_over_HC	1.32772909064704	0.000104921345826142	84.208630119116
ENSG00000094804	CDC6	cell division cycle 6	protein_coding	Delta_over_HC	1.44582438096626	5.50005859825411e-05	32.9430135862709
ENSG00000104738	MCM4	minichromosome maintenance complex component 4	protein_coding	Delta_over_HC	1.07912232481787	0.000104380678284454	233.051454728829
ENSG00000105464	GRIN2D	glutamate ionotropic receptor NMDA type subunit 2D	protein_coding	Delta_over_HC	1.26473912146188	0.0134590237963516	14.2671740086053
ENSG00000105967	TFEC	transcription factor EC	protein_coding	Delta_over_HC	1.19729031587795	0.00764889749386097	752.890418631075
ENSG00000106211	HSPB1	heat shock protein family B (small) member 1	protein_coding	Delta_over_HC	1.21105656187122	0.0428635431258556	299.416788071433
ENSG00000106366	SERPINE1	serpin family E member 1	protein_coding	Delta_over_HC	1.56617589994938	0.014985860300978	47.0112829107441
ENSG00000106785	TRIM14	tripartite motif containing 14	protein_coding	Delta_over_HC	1.21127321729012	4.83226243508419e-06	1500.27869690833
ENSG00000107201	DDX58	DExD/H-box helicase 58	protein_coding	Delta_over_HC	1.3425891618398	0.00715448275874246	766.000538800502
ENSG00000108375	RNF43	ring finger protein 43	protein_coding	Delta_over_HC	1.19552826517496	0.0499459240384741	6.259602364749
ENSG00000108387	SEPTIN4	septin 4	protein_coding	Delta_over_HC	2.95133066617971	6.56032996154781e-07	77.3771041707202
ENSG00000108700	CCL8	C-C motif chemokine ligand 8	protein_coding	Delta_over_HC	5.45473499393536	2.36618033994861e-05	20.0718399986935
ENSG00000109805	NCAPG	non-SMC condensin I complex subunit G	protein_coding	Delta_over_HC	1.4404208833608	0.00254843017932486	122.603555117259
ENSG00000110079	MS4A4A	membrane spanning 4-domains A4A	protein_coding	Delta_over_HC	1.49363979062649	0.0158534733882344	87.121057514632
ENSG00000111224	PARP11	poly(ADP-ribose) polymerase family member 11	protein_coding	Delta_over_HC	1.08564049556882	0.000142007306962844	553.95064058131
ENSG00000112773	TENT5A	terminal nucleotidyltransferase 5A	protein_coding	Delta_over_HC	1.16171446846959	0.000572360228599637	804.505612352578
ENSG00000112984	KIF20A	kinesin family member 20A	protein_coding	Delta_over_HC	1.80013902268937	0.002928409093759	15.0495343208617
ENSG00000113494	PRLR	prolactin receptor	protein_coding	Delta_over_HC	1.05819250657577	0.00227420055106138	49.9980843663233
ENSG00000115163	CENPA	centromere protein A	protein_coding	Delta_over_HC	1.47117909416941	0.0111604030747596	9.64422848746607
ENSG00000115267	IFIH1	interferon induced with helicase C domain 1	protein_coding	Delta_over_HC	1.99494132880818	1.59911546005474e-05	1968.42259961843
ENSG00000116663	FBXO6	F-box protein 6	protein_coding	Delta_over_HC	1.47514131679782	0.00162496500211269	246.893169400519
ENSG00000116690	PRG4	proteoglycan 4	protein_coding	Delta_over_HC	1.36034993190886	0.0456599995845946	5.39018035054627
ENSG00000117010	ZNF684	zinc finger protein 684	protein_coding	Delta_over_HC	2.18091984470721	1.86456649628222e-06	98.2379603390967
ENSG00000117226	GBP3	guanylate binding protein 3	protein_coding	Delta_over_HC	1.54351912626243	0.00127971342398821	667.797679843634
ENSG00000117228	GBP1	guanylate binding protein 1	protein_coding	Delta_over_HC	1.7097292599758	0.00160129138475745	3390.55539423526
ENSG00000117399	CDC20	cell division cycle 20	protein_coding	Delta_over_HC	1.71075621854295	0.0207603062295816	24.2256524387334
ENSG00000117724	CENPF	centromere protein F	protein_coding	Delta_over_HC	1.04947132845549	0.0127272003619673	150.921887364867
ENSG00000119917	IFIT3	interferon induced protein with tetratricopeptide repeats 3	protein_coding	Delta_over_HC	2.48546350060206	0.000208625044354822	11543.6041089879
ENSG00000119922	IFIT2	interferon induced protein with tetratricopeptide repeats 2	protein_coding	Delta_over_HC	2.40657912045658	0.000383132226956837	14475.6933667667
ENSG00000121236	TRIM6	tripartite motif containing 6	protein_coding	Delta_over_HC	1.82969461497249	0.00799895501585238	46.1519834197595
ENSG00000121380	BCL2L14	BCL2 like 14	protein_coding	Delta_over_HC	2.79887575680503	0.00167276664359163	7.04640957679973
ENSG00000121797	CCRL2	C-C motif chemokine receptor like 2	protein_coding	Delta_over_HC	1.39904491698395	0.00287995290458332	81.6133339293142
ENSG00000121858	TNFSF10	TNF superfamily member 10	protein_coding	Delta_over_HC	1.39082865403075	0.0148711990220142	4328.53092124418
ENSG00000122643	NT5C3A	5'-nucleotidase, cytosolic IIIA	protein_coding	Delta_over_HC	1.1751223348574	0.000269428720930626	1838.16198726913
ENSG00000122966	CIT	citron rho-interacting serine/threonine kinase	protein_coding	Delta_over_HC	1.13064679864741	9.02764031493608e-06	65.537588313901
ENSG00000124256	ZBP1	Z-DNA binding protein 1	protein_coding	Delta_over_HC	1.91751670849144	1.26668219354556e-05	1386.65311585586
ENSG00000124635	H2BC11	H2B clustered histone 11	protein_coding	Delta_over_HC	1.1058699090564	0.0054407742946847	255.769271457663
ENSG00000124657	OR2B6	olfactory receptor family 2 subfamily B member 6	protein_coding	Delta_over_HC	1.78464551773001	0.0253464842401255	24.0068924571305
ENSG00000124762	CDKN1A	cyclin dependent kinase inhibitor 1A	protein_coding	Delta_over_HC	1.06491980448723	0.00881042660488087	600.845762956837
ENSG00000124920	MYRF	myelin regulatory factor	protein_coding	Delta_over_HC	1.52066151335246	0.00106945230954381	23.3234941383864
ENSG00000128342	LIF	LIF interleukin 6 family cytokine	protein_coding	Delta_over_HC	2.30507867615075	0.00456372301010487	6.3825518623053
ENSG00000129173	E2F8	E2F transcription factor 8	protein_coding	Delta_over_HC	1.82381373379395	0.00181084122274093	17.4065147205713
ENSG00000130303	BST2	bone marrow stromal cell antigen 2	protein_coding	Delta_over_HC	1.50530173888775	5.95286842207479e-05	549.08671747745
ENSG00000130589	HELZ2	helicase with zinc finger 2	protein_coding	Delta_over_HC	1.34033464522891	0.0037513327364914	4102.56077920873
ENSG00000130813	SHFL	shiftless antiviral inhibitor of ribosomal frameshifting	protein_coding	Delta_over_HC	1.28738511850402	1.48764351589684e-05	953.323430421964
ENSG00000131747	TOP2A	DNA topoisomerase II alpha	protein_coding	Delta_over_HC	1.42317562268557	0.000623787378552903	197.591606918491
ENSG00000132256	TRIM5	tripartite motif containing 5	protein_coding	Delta_over_HC	1.42752140064422	5.27188506530162e-05	942.04583788289
ENSG00000132274	TRIM22	tripartite motif containing 22	protein_coding	Delta_over_HC	1.25395518048587	0.00207643799035368	7198.91327206648
ENSG00000132669	RIN2	Ras and Rab interactor 2	protein_coding	Delta_over_HC	2.0015871201315	4.95372505164676e-06	523.851444587605
ENSG00000134716	CYP2J2	cytochrome P450 family 2 subfamily J member 2	protein_coding	Delta_over_HC	1.53485624087628	0.00167964571693217	9.40851620883187
ENSG00000134809	TIMM10	translocase of inner mitochondrial membrane 10	protein_coding	Delta_over_HC	1.88547888651055	6.20971406370737e-06	109.95028880066
ENSG00000135047	CTSL	cathepsin L	protein_coding	Delta_over_HC	1.60105435313458	0.00894679956443682	115.279221620944
ENSG00000135540	NHSL1	NHS like 1	protein_coding	Delta_over_HC	1.38485366646983	0.00305332383370229	48.4867249772321
ENSG00000135903	PAX3	paired box 3	protein_coding	Delta_over_HC	4.51492776360969	0.00128889568833714	2.59810501035928
ENSG00000136147	PHF11	PHD finger protein 11	protein_coding	Delta_over_HC	1.02266740025617	0.000289254870997271	1062.56552727239
ENSG00000136689	IL1RN	interleukin 1 receptor antagonist	protein_coding	Delta_over_HC	1.64955484184343	0.013886744593668	2784.73372363666
ENSG00000136816	TOR1B	torsin family 1 member B	protein_coding	Delta_over_HC	1.30479169380717	0.00168033164412058	710.559843505069
ENSG00000137200	CMTR1	cap methyltransferase 1	protein_coding	Delta_over_HC	1.0867954330622	0.000151339167956846	980.615094484881
ENSG00000137628	DDX60	DExD/H-box helicase 60	protein_coding	Delta_over_HC	2.01041453712694	5.74691367086301e-06	3350.81369557433
ENSG00000138035	PNPT1	polyribonucleotide nucleotidyltransferase 1	protein_coding	Delta_over_HC	1.60417680364245	3.68962243846422e-07	557.777818446868
ENSG00000138119	MYOF	myoferlin	protein_coding	Delta_over_HC	1.07919940539507	0.0214570499652553	653.041974639072
ENSG00000138166	DUSP5	dual specificity phosphatase 5	protein_coding	Delta_over_HC	1.17252958453442	0.00707766366951448	238.098801686278
ENSG00000138180	CEP55	centrosomal protein 55	protein_coding	Delta_over_HC	1.87424337410951	0.000709811317829127	22.6330170260374
ENSG00000138496	PARP9	poly(ADP-ribose) polymerase family member 9	protein_coding	Delta_over_HC	1.17424891898875	0.0150466726549917	5141.11074427104
ENSG00000138646	HERC5	HECT and RLD domain containing E3 ubiquitin protein ligase 5	protein_coding	Delta_over_HC	2.13280271819408	0.00158361233579453	2483.44214241638
ENSG00000138670	RASGEF1B	RasGEF domain family member 1B	protein_coding	Delta_over_HC	1.02282901506398	0.000521749216137238	388.131868885965
ENSG00000139618	BRCA2	BRCA2 DNA repair associated	protein_coding	Delta_over_HC	1.20076046466822	5.99661668927424e-06	294.289170218878
ENSG00000140464	PML	PML nuclear body scaffold	protein_coding	Delta_over_HC	1.55381986724391	0.00033591956811823	2071.63285823024
ENSG00000141664	ZCCHC2	zinc finger CCHC-type containing 2	protein_coding	Delta_over_HC	1.31918652409872	0.000580296261652555	3320.92660061728
ENSG00000141837	CACNA1A	calcium voltage-gated channel subunit alpha1 A	protein_coding	Delta_over_HC	1.46359379294337	0.0459904571521433	22.2966634115933
ENSG00000142089	IFITM3	interferon induced transmembrane protein 3	protein_coding	Delta_over_HC	2.0517242078859	0.00212286430752955	7254.16623825838
ENSG00000143476	DTL	denticleless E3 ubiquitin protein ligase homolog	protein_coding	Delta_over_HC	1.45152063887709	0.000234862739565903	97.7188231735888
ENSG00000143554	SLC27A3	solute carrier family 27 member 3	protein_coding	Delta_over_HC	1.14361355717034	8.72375835166e-05	398.501150502294
ENSG00000143891	GALM	galactose mutarotase	protein_coding	Delta_over_HC	1.69765893984871	0.000291409302830127	283.59558411431
ENSG00000145016	RUBCN	rubicon autophagy regulator	protein_coding	Delta_over_HC	1.07028750525023	9.6296882799195e-06	1637.89270269303
ENSG00000145850	TIMD4	T cell immunoglobulin and mucin domain containing 4	protein_coding	Delta_over_HC	1.02513970152799	0.0093242452151998	15.1391146097807
ENSG00000148773	MKI67	marker of proliferation Ki-67	protein_coding	Delta_over_HC	1.31971996252914	0.000461894272703274	509.469340563531
ENSG00000149131	SERPING1	serpin family G member 1	protein_coding	Delta_over_HC	2.93829697949032	0.000269428720930626	854.337521527798
ENSG00000149554	CHEK1	checkpoint kinase 1	protein_coding	Delta_over_HC	1.05856463868346	0.00443805875828207	51.9518955723013
ENSG00000150594	ADRA2A	adrenoceptor alpha 2A	protein_coding	Delta_over_HC	1.36833622678056	0.0388422008339872	27.9356417218178
ENSG00000152558	TMEM123	transmembrane protein 123	protein_coding	Delta_over_HC	1.15990928168917	7.29008531161358e-05	8782.12630216232
ENSG00000152778	IFIT5	interferon induced protein with tetratricopeptide repeats 5	protein_coding	Delta_over_HC	1.66391878787475	0.000466164290031928	2371.02687611619
ENSG00000155363	MOV10	Mov10 RISC complex RNA helicase	protein_coding	Delta_over_HC	1.83704651624496	1.31426994001915e-08	949.262268126397
ENSG00000156587	UBE2L6	ubiquitin conjugating enzyme E2 L6	protein_coding	Delta_over_HC	1.71023264140054	0.00137275510061335	2170.88002266132
ENSG00000157456	CCNB2	cyclin B2	protein_coding	Delta_over_HC	1.63939002878193	0.00486222334609232	25.4804686742867
ENSG00000158406	H4C8	H4 clustered histone 8	protein_coding	Delta_over_HC	1.05281776908024	4.11705394615203e-07	564.792191972726
ENSG00000160791	CCR5	C-C motif chemokine receptor 5	protein_coding	Delta_over_HC	1.0906203307021	7.41485422731765e-05	429.430882822223
ENSG00000160957	RECQL4	RecQ like helicase 4	protein_coding	Delta_over_HC	1.25895457293966	0.000580296261652555	27.1112297812867
ENSG00000162512	SDC3	syndecan 3	protein_coding	Delta_over_HC	1.66675750257685	0.0114226224205254	79.0232926097559
ENSG00000162654	GBP4	guanylate binding protein 4	protein_coding	Delta_over_HC	1.24130597838919	0.00221071233108371	2342.36436974967
ENSG00000162714	ZNF496	zinc finger protein 496	protein_coding	Delta_over_HC	1.09584617528911	1.3530815528435e-05	422.391100359427
ENSG00000162772	ATF3	activating transcription factor 3	protein_coding	Delta_over_HC	2.07208927413452	0.00212286430752955	64.4399543636128
ENSG00000163016	ALMS1P1	ALMS1 pseudogene 1	transcribed_unprocessed_pseudogene	Delta_over_HC	4.41187784558204	2.07212998605e-06	58.668657034284
ENSG00000164045	CDC25A	cell division cycle 25A	protein_coding	Delta_over_HC	1.88858082175991	0.000745399445757276	15.7318894219864
ENSG00000164054	SHISA5	shisa family member 5	protein_coding	Delta_over_HC	1.22204089857231	0.00927007806974469	6200.971965244
ENSG00000164308	ERAP2	endoplasmic reticulum aminopeptidase 2	protein_coding	Delta_over_HC	1.33676643879016	0.00780848112944417	1276.04121406649
ENSG00000164342	TLR3	toll like receptor 3	protein_coding	Delta_over_HC	1.00747343790513	0.00717806350428742	48.1019155243284
ENSG00000165185	KIAA1958	KIAA1958	protein_coding	Delta_over_HC	1.76036201147439	1.57650873786543e-05	369.77383199503
ENSG00000165891	E2F7	E2F transcription factor 7	protein_coding	Delta_over_HC	1.94686235308949	5.83557858608828e-05	17.3098559746076
ENSG00000166211	SPIC	Spi-C transcription factor	protein_coding	Delta_over_HC	2.70603787864767	0.0308502228420129	7.23810513564895
ENSG00000166750	SLFN5	schlafen family member 5	protein_coding	Delta_over_HC	1.17979435091757	0.00018015973132806	6666.5437833321
ENSG00000166839	ANKDD1A	ankyrin repeat and death domain containing 1A	protein_coding	Delta_over_HC	1.14940442517736	0.0198551549019135	77.3410676876812
ENSG00000168026	TTC21A	tetratricopeptide repeat domain 21A	protein_coding	Delta_over_HC	1.06737830780969	0.0034271986355645	127.231307043675
ENSG00000168062	BATF2	basic leucine zipper ATF-like transcription factor 2	protein_coding	Delta_over_HC	2.30298827756464	0.00110336471522323	193.873787757139
ENSG00000168078	PBK	PDZ binding kinase	protein_coding	Delta_over_HC	2.19971146610958	0.00456994068916875	7.6356202648228
ENSG00000169136	ATF5	activating transcription factor 5	protein_coding	Delta_over_HC	1.06997340053688	0.00511087681340093	194.378681908229
ENSG00000169245	CXCL10	C-X-C motif chemokine ligand 10	protein_coding	Delta_over_HC	3.92991789425201	2.52129488635561e-08	89.2063003970054
ENSG00000169248	CXCL11	C-X-C motif chemokine ligand 11	protein_coding	Delta_over_HC	3.00755070567045	0.00935796210841766	3.00634123967418
ENSG00000169607	CKAP2L	cytoskeleton associated protein 2 like	protein_coding	Delta_over_HC	1.31545912918137	0.0162111995567769	30.4411111722855
ENSG00000170439	METTL7B	methyltransferase like 7B	protein_coding	Delta_over_HC	2.82507335724747	0.00417644771440107	5.07909082099221
ENSG00000170581	STAT2	signal transducer and activator of transcription 2	protein_coding	Delta_over_HC	1.26183388483645	0.000699441353857252	3913.36033865318
ENSG00000171241	SHCBP1	SHC binding and spindle associated 1	protein_coding	Delta_over_HC	1.181787514976	0.0018763510326994	39.1588881181693
ENSG00000171320	ESCO2	establishment of sister chromatid cohesion N-acetyltransferase 2	protein_coding	Delta_over_HC	1.39137315302358	0.00263414118918003	24.3874670911533
ENSG00000171658	NMRAL2P	NmrA like redox sensor 2, pseudogene	transcribed_unprocessed_pseudogene	Delta_over_HC	2.54353310698918	0.00167276664359163	7.50483990361849
ENSG00000173193	PARP14	poly(ADP-ribose) polymerase family member 14	protein_coding	Delta_over_HC	1.04818089515113	0.0125826588411486	8490.69250907167
ENSG00000173369	C1QB	complement C1q B chain	protein_coding	Delta_over_HC	2.20989786484259	0.0496449838785293	57.3053853748701
ENSG00000173786	CNP	2',3'-cyclic nucleotide 3' phosphodiesterase	protein_coding	Delta_over_HC	1.27746002207067	1.26962944804888e-06	762.089700439946
ENSG00000174371	EXO1	exonuclease 1	protein_coding	Delta_over_HC	1.47665817035383	1.86282662342397e-05	26.3684922555169
ENSG00000175063	UBE2C	ubiquitin conjugating enzyme E2 C	protein_coding	Delta_over_HC	1.18737487937232	0.000442185527541699	33.8936798670778
ENSG00000175518	UBQLNL	ubiquilin like	protein_coding	Delta_over_HC	2.11766539417132	0.00251898093066224	14.5083698895142
ENSG00000177335	LINC02904	long intergenic non-protein coding RNA 2904	lncRNA	Delta_over_HC	1.70450113102588	0.00548001237107045	20.39590800269
ENSG00000177359	AC024940.1	ovostatin 2	transcribed_unprocessed_pseudogene	Delta_over_HC	2.79419852359369	0.0178363446424438	33.2190225406645
ENSG00000177409	SAMD9L	sterile alpha motif domain containing 9 like	protein_coding	Delta_over_HC	1.57699089135873	0.00156484307026007	7345.31129659399
ENSG00000177602	HASPIN	histone H3 associated protein kinase	protein_coding	Delta_over_HC	1.35830011389274	0.0112987836559699	16.8632592403923
ENSG00000177989	ODF3B	outer dense fiber of sperm tails 3B	protein_coding	Delta_over_HC	1.11971439517011	0.0392063448697082	499.766240391174
ENSG00000178175	ZNF366	zinc finger protein 366	protein_coding	Delta_over_HC	1.32767651725825	0.010966911336234	38.0468384458647
ENSG00000178685	PARP10	poly(ADP-ribose) polymerase family member 10	protein_coding	Delta_over_HC	1.35586762675106	0.000823439413398112	1607.77320604748
ENSG00000178965	ERICH3	glutamate rich 3	protein_coding	Delta_over_HC	2.89130485473487	0.000694515748804251	17.552202054992
ENSG00000179044	EXOC3L1	exocyst complex component 3 like 1	protein_coding	Delta_over_HC	2.57354976846828	0.00039819015465043	28.183134955755
ENSG00000179750	APOBEC3B	apolipoprotein B mRNA editing enzyme catalytic subunit 3B	protein_coding	Delta_over_HC	2.13873855615787	0.0316235833785152	92.8091669253873
ENSG00000181616	OR52H1	olfactory receptor family 52 subfamily H member 1	protein_coding	Delta_over_HC	1.90418191024873	0.0114226224205254	6.52914578330524
ENSG00000183087	GAS6	growth arrest specific 6	protein_coding	Delta_over_HC	1.19602185930896	0.00127190130897661	62.0522774502429
ENSG00000183486	MX2	MX dynamin like GTPase 2	protein_coding	Delta_over_HC	1.07616381720297	0.0262926325077058	8857.85162539455
ENSG00000184661	CDCA2	cell division cycle associated 2	protein_coding	Delta_over_HC	1.28007862046498	0.00719958507032046	30.5386605202241
ENSG00000185338	SOCS1	suppressor of cytokine signaling 1	protein_coding	Delta_over_HC	1.51334986401172	0.00287192883041135	133.935675370669
ENSG00000185745	IFIT1	interferon induced protein with tetratricopeptide repeats 1	protein_coding	Delta_over_HC	2.85532119687771	0.000352548722132614	7974.94685339693
ENSG00000185880	TRIM69	tripartite motif containing 69	protein_coding	Delta_over_HC	1.04539363623145	0.00159145555350425	992.714254634203
ENSG00000185885	IFITM1	interferon induced transmembrane protein 1	protein_coding	Delta_over_HC	1.22914599619179	0.0452617446496072	3082.58230349844
ENSG00000186407	CD300E	CD300e molecule	protein_coding	Delta_over_HC	1.51114271157085	0.000705766888872353	1405.36860673701
ENSG00000187193	MT1X	metallothionein 1X	protein_coding	Delta_over_HC	1.02449185358677	0.00958012918237407	49.3822005913857
ENSG00000187741	FANCA	FA complementation group A	protein_coding	Delta_over_HC	1.13547703151049	0.00114742548681579	283.698067424577
ENSG00000188313	PLSCR1	phospholipid scramblase 1	protein_coding	Delta_over_HC	1.73262039495771	0.00242935788024486	2583.63508812658
ENSG00000188343	CIBAR1	CBY1 interacting BAR domain containing 1	protein_coding	Delta_over_HC	1.19847615299948	0.0381752029554403	6.18876114195829
ENSG00000189229	AC069277.1	novel transcript	lncRNA	Delta_over_HC	3.505918228155	0.0373601401131789	13.5848800526768
ENSG00000196123	KIAA0895L	KIAA0895 like	protein_coding	Delta_over_HC	1.39815931977016	8.17706461041894e-05	56.0884964608966
ENSG00000196132	MYT1	myelin transcription factor 1	protein_coding	Delta_over_HC	2.14670136564421	0.0431651775184634	2.87598223827221
ENSG00000196664	TLR7	toll like receptor 7	protein_coding	Delta_over_HC	1.13523169860625	0.0031457902448145	501.457142044069
ENSG00000197121	PGAP1	post-GPI attachment to proteins inositol deacylase 1	protein_coding	Delta_over_HC	1.58814038595985	7.27510028554297e-11	205.575833146651
ENSG00000197238	H4C11	H4 clustered histone 11	protein_coding	Delta_over_HC	1.04650567071008	0.019696443707288	18.7511680205239
ENSG00000197272	IL27	interleukin 27	protein_coding	Delta_over_HC	1.8082328430619	0.0301964699591477	13.4751814716802
ENSG00000197646	PDCD1LG2	programmed cell death 1 ligand 2	protein_coding	Delta_over_HC	1.70405990968797	0.0183984935344775	28.1738388648148
ENSG00000198719	DLL1	delta like canonical Notch ligand 1	protein_coding	Delta_over_HC	1.22688261439655	0.000109889827693308	28.3069711175267
ENSG00000198785	GRIN3A	glutamate ionotropic receptor NMDA type subunit 3A	protein_coding	Delta_over_HC	2.46363860527706	0.000714409345916365	19.303181290734
ENSG00000203616	RHOT1P2	ras homolog family member T1 pseudogene 2	processed_pseudogene	Delta_over_HC	2.12313721898651	0.0382592117443661	7.0653138380973
ENSG00000204103	MAFB	MAF bZIP transcription factor B	protein_coding	Delta_over_HC	1.19484694074371	0.0136554257384685	1040.63210501936
ENSG00000204872	NAT8B	N-acetyltransferase 8B (putative, gene/pseudogene)	polymorphic_pseudogene	Delta_over_HC	1.17137528857535	0.022518656976903	25.7201851754101
ENSG00000205413	SAMD9	sterile alpha motif domain containing 9	protein_coding	Delta_over_HC	1.27100478036044	0.00251464959074169	7901.05223359283
ENSG00000209082	MT-TL1	mitochondrially encoded tRNA-Leu (UUA/G) 1	Mt_tRNA	Delta_over_HC	1.50183243012083	0.0492012493930013	45.0674363524605
ENSG00000211642	IGLV10-54	immunoglobulin lambda variable 10-54	IG_V_gene	Delta_over_HC	2.28566562557751	0.027136571492255	25.9222353343264
ENSG00000211904	IGHJ2	immunoglobulin heavy joining 2	IG_J_gene	Delta_over_HC	2.22481228829572	0.0335434589802313	6.10605640596747
ENSG00000211934	IGHV1-2	immunoglobulin heavy variable 1-2	IG_V_gene	Delta_over_HC	2.29953996392041	0.00156305641462044	143.748205269111
ENSG00000211967	IGHV3-53	immunoglobulin heavy variable 3-53	IG_V_gene	Delta_over_HC	3.48599404132912	4.04190109684132e-05	98.0713961204665
ENSG00000211974	IGHV2-70D	immunoglobulin heavy variable 2-70D	IG_V_gene	Delta_over_HC	4.4265552425912	0.0125826588411486	35.7693540085145
ENSG00000213492	NT5C3AP1	NT5C3A pseudogene 1	transcribed_processed_pseudogene	Delta_over_HC	1.81635278841009	0.00287192883041135	6.5361504188527
ENSG00000221955	SLC12A8	solute carrier family 12 member 8	protein_coding	Delta_over_HC	1.92201209823527	0.00348627605497759	8.54623468907204
ENSG00000221963	APOL6	apolipoprotein L6	protein_coding	Delta_over_HC	1.08422094452368	0.00639860837487029	5999.98164697017
ENSG00000223387	LINC02068	long intergenic non-protein coding RNA 2068	lncRNA	Delta_over_HC	4.52236757428332	0.00106129211043898	13.8454367654195
ENSG00000223960	CHROMR	cholesterol induced regulator of metabolism RNA	lncRNA	Delta_over_HC	1.46496244508497	9.5093586973085e-09	237.88610184799
ENSG00000224295	OLFM5P	olfactomedin family member 5, pseudogene	unitary_pseudogene	Delta_over_HC	1.66243929982124	0.0120380537064986	10.9917764601759
ENSG00000224789	AC012363.1	novel transcript	lncRNA	Delta_over_HC	2.27763183612228	0.00570980394221586	16.5211191408547
ENSG00000225101	OR52K3P	olfactory receptor family 52 subfamily K member 3 pseudogene	transcribed_unprocessed_pseudogene	Delta_over_HC	1.11813253603707	0.00840232639739694	471.152517932334
ENSG00000225431	LINC01671	long intergenic non-protein coding RNA 1671	lncRNA	Delta_over_HC	3.15074941645919	0.00237255605397495	3.59748290174081
ENSG00000225492	GBP1P1	guanylate binding protein 1 pseudogene 1	transcribed_unprocessed_pseudogene	Delta_over_HC	3.04404522237655	3.51581054579386e-05	46.2935915416861
ENSG00000226004	LINC02528	long intergenic non-protein coding RNA 2528	lncRNA	Delta_over_HC	2.83605904859543	0.00559135138317754	12.5410746229854
ENSG00000226025	LGALS17A	galectin 14 pseudogene	transcribed_unprocessed_pseudogene	Delta_over_HC	1.6159906824123	0.0125826588411486	3.94682118891843
ENSG00000226758	DISC1-IT1	DISC1 intronic transcript 1	lncRNA	Delta_over_HC	1.1852043779023	0.0485136945520624	19.0039612260507
ENSG00000226822	LINC02785	long intergenic non-protein coding RNA 2785	lncRNA	Delta_over_HC	1.23862195552825	0.0138496111169815	64.8163111571625
ENSG00000227297	AL035541.1	novel transcript	lncRNA	Delta_over_HC	1.88747593212904	0.00348228368960324	14.2942540346356
ENSG00000228318	AP001610.2	novel transcript	lncRNA	Delta_over_HC	3.47411389539766	0.00334688793825559	2.62910626591729
ENSG00000229425	AJ009632.2	novel transcript	lncRNA	Delta_over_HC	1.58910592969381	0.0105504336772968	5.17460019064427
ENSG00000229754	CXCR2P1	C-X-C motif chemokine receptor 2 pseudogene 1	transcribed_unprocessed_pseudogene	Delta_over_HC	1.23725832334339	0.00166777821545609	1306.36672635991
ENSG00000230191	IFITM3P4	IFITM3 pseudogene 4	processed_pseudogene	Delta_over_HC	2.11515594281622	0.0474594494522336	6.15146479054362
ENSG00000230965	SNX18P13	sorting nexin 18 pseudogene 13	processed_pseudogene	Delta_over_HC	2.3592367734796	0.0354561897344938	4.05471503238765
ENSG00000231528	FAM225A	family with sequence similarity 225 member A	lncRNA	Delta_over_HC	2.81405587353048	0.00649144077961628	5.94267710119845
ENSG00000232381	OR52U1P	olfactory receptor family 52 subfamily U member 1 pseudogene	unprocessed_pseudogene	Delta_over_HC	1.34728494100631	0.00239286231450388	27.1963922029088
ENSG00000232504	ST3GAL5-AS1	ST3GAL5 antisense RNA 1 (head to head)	lncRNA	Delta_over_HC	1.43290530834424	0.00252887540578927	9.73268256500171
ENSG00000232884	AF127936.1	novel transcript	lncRNA	Delta_over_HC	2.37576736696404	0.000149393834079636	21.2551853142824
ENSG00000233030	AC243772.2	novel transcript, antisense to FCGR1A	lncRNA	Delta_over_HC	2.14936875041139	0.00324543736624887	60.4394482707275
ENSG00000233822	H2BC15	H2B clustered histone 15	protein_coding	Delta_over_HC	1.04582337086477	0.000958699195656438	165.225038276482
ENSG00000235081	AC245052.3	novel pseudogene	processed_pseudogene	Delta_over_HC	1.3818226683159	0.0222248082694823	8.53570262895382
ENSG00000235513	L3MBTL2-AS1	L3MBTL2 antisense RNA 1	lncRNA	Delta_over_HC	1.2495166861117	0.00704858074021391	18.8027990357964
ENSG00000237989	LINC01679	long intergenic non-protein coding RNA 1679	lncRNA	Delta_over_HC	1.61715405116253	0.013999662307662	14.7033872074339
ENSG00000238015	AC104837.2	ribosomal protein L23 (RPL23) pseudogene	processed_pseudogene	Delta_over_HC	2.96304733839153	0.000450063846363616	21.6616673640524
ENSG00000239920	AC104389.5	novel transcript	protein_coding	Delta_over_HC	1.70735729254774	0.000597676388940072	23.0288984663888
ENSG00000244264	RN7SL597P	RNA, 7SL, cytoplasmic 597, pseudogene	misc_RNA	Delta_over_HC	2.75331989109142	0.0495112990170483	3.36402317521821
ENSG00000244682	FCGR2C	Fc fragment of IgG receptor IIc (gene/pseudogene)	polymorphic_pseudogene	Delta_over_HC	1.09124477018599	0.0288749319796469	479.692330088039
ENSG00000246375	PPM1K-DT	PPM1K divergent transcript	lncRNA	Delta_over_HC	3.03241027976927	0.00028996978310773	5.37841441221041
ENSG00000248553	OR52H2P	olfactory receptor family 52 subfamily H member 2 pseudogene	unitary_pseudogene	Delta_over_HC	1.9512426583721	0.0144638042889824	5.14421547089879
ENSG00000249633	OR52V1P	olfactory receptor family 52 subfamily V member 1 pseudogene	unprocessed_pseudogene	Delta_over_HC	2.78126726760447	0.00106946271117657	4.14605424340245
ENSG00000251301	LINC02384	long intergenic non-protein coding RNA 2384	lncRNA	Delta_over_HC	1.1613215823512	0.00156585469022724	234.218485475126
ENSG00000252206	RNU7-40P	RNA, U7 small nuclear 40 pseudogene	snRNA	Delta_over_HC	1.47085473534325	0.0098271756879154	12.9506873907742
ENSG00000253686	LINC01484	long intergenic non-protein coding RNA 1484	lncRNA	Delta_over_HC	4.13079739382672	0.000484740863922395	2.851184295078
ENSG00000254602	AP000662.1	novel transcript, sense overlapping CLP1	lncRNA	Delta_over_HC	2.96910761351938	0.0258449041768004	3.40700022395705
ENSG00000255337	TMEM123-DT	TMEM123 divergent transcript	lncRNA	Delta_over_HC	2.76819094645037	0.027491665993179	2.42989840743307
ENSG00000256356	HSPA8P5	heat shock protein family A (Hsp70) member 8 pseudogene 5	processed_pseudogene	Delta_over_HC	1.4201412769837	0.0136554257384685	14.0368822483066
ENSG00000258159	IMMP1LP2	inner mitochondrial membrane peptidase subunit 1 pseudogene 2	processed_pseudogene	Delta_over_HC	2.31984535955937	0.00609969327772022	4.85832942394196
ENSG00000258659	TRIM34	tripartite motif containing 34	protein_coding	Delta_over_HC	1.24543824731239	0.0197488071463899	5.9539317338213
ENSG00000258872	FDPSP3	farnesyl diphosphate synthase pseudogene 3	transcribed_processed_pseudogene	Delta_over_HC	1.21690740285899	0.0346715118063516	18.499041682233
ENSG00000261889	AC108134.2	novel transcript	lncRNA	Delta_over_HC	1.68989487671468	0.00674702922476022	4.94762400215861
ENSG00000262877	AC110285.2	novel transcript	lncRNA	Delta_over_HC	1.13887358073884	0.00424275664506437	14.1612930152099
ENSG00000263766	KPNB1-DT	KPNB1 divergent transcript	lncRNA	Delta_over_HC	1.09798099645824	0.0123948882385573	99.1012456419193
ENSG00000264370	MIR3125	microRNA 3125	miRNA	Delta_over_HC	2.42409054468511	0.0164731821598729	2.39925184793663
ENSG00000267102	AC060766.1	RAB32, member RAS oncogene family (RAB32) pseudogene	transcribed_processed_pseudogene	Delta_over_HC	1.04287613965861	0.0121644034884256	33.1112720319727
ENSG00000267666	AC004156.1	novel transcript	lncRNA	Delta_over_HC	2.12004624089603	0.0168701632992696	2.41705622502573
ENSG00000271207	MTCO1P22	MT-CO1 pseudogene 22	processed_pseudogene	Delta_over_HC	1.565470622656	0.0373992100456637	7.04144485463963
ENSG00000272666	KLHDC7B-DT	KLHDC7B divergent transcript	lncRNA	Delta_over_HC	1.67128135117989	0.0147024186307552	17.0021084657043
ENSG00000273802	H2BC8	H2B clustered histone 8	protein_coding	Delta_over_HC	1.16623870389659	0.00480211980502607	215.428565277581
ENSG00000273824	AC008033.3	novel transcript	lncRNA	Delta_over_HC	1.07934496504213	0.0219048212481222	67.9368860003584
ENSG00000274290	H2BC6	H2B clustered histone 6	protein_coding	Delta_over_HC	1.2967602896821	3.48772153923808e-09	252.187098886664
ENSG00000274602	PI4KAP1	phosphatidylinositol 4-kinase alpha pseudogene 1	transcribed_unprocessed_pseudogene	Delta_over_HC	1.27976603338405	0.0497232876363795	71.2980118277447
ENSG00000274618	H4C6	H4 clustered histone 6	protein_coding	Delta_over_HC	1.0578270299163	1.3796669554987e-05	350.934251441264
ENSG00000275832	ARHGAP23	Rho GTPase activating protein 23	protein_coding	Delta_over_HC	1.05992196775193	0.00806499316175063	20.9694996577587
ENSG00000276180	H4C9	H4 clustered histone 9	protein_coding	Delta_over_HC	1.34767147550029	0.000145090874759608	86.0187607858886
ENSG00000277157	H4C4	H4 clustered histone 4	protein_coding	Delta_over_HC	1.43145564568298	9.70405697167368e-08	217.555467472223
ENSG00000277511	AC116407.2	novel transcript	lncRNA	Delta_over_HC	2.07115135672196	9.2122178832775e-05	35.7400084502012
ENSG00000278677	H2AC17	H2A clustered histone 17	protein_coding	Delta_over_HC	1.31834615791651	0.0287819250241774	5.45180221706364
ENSG00000279236	AC064801.2	novel transcript	TEC	Delta_over_HC	1.23328163650642	0.00277226134693588	92.9234232492234
ENSG00000280270	AC068299.2	TEC	TEC	Delta_over_HC	2.87615066662886	0.000158725342003706	14.7925636245006
ENSG00000281406	BLACAT1	bladder cancer associated transcript 1	protein_coding	Delta_over_HC	1.72031880150363	0.00184961740401224	5.76687746416791
ENSG00000282851	BISPR	BST2 interferon stimulated positive regulator	lncRNA	Delta_over_HC	1.28036717659175	2.834379952508e-05	292.871274076267
ENSG00000282988	AL031777.2	novel protein	protein_coding	Delta_over_HC	1.43364393462336	0.0083343073651912	80.5557209121419
ENSG00000284194	SCO2	synthesis of cytochrome C oxidase 2	protein_coding	Delta_over_HC	1.24297122665276	0.0299649584680946	323.596910583712
ENSG00000286122	AC016074.2	novel transcript	lncRNA	Delta_over_HC	1.02655523718546	0.0373992100456637	40.1715984509201
ENSG00000286427	AC009486.2	novel transcript	lncRNA	Delta_over_HC	2.19162332844336	0.000597676388940072	7.49663023430843
ENSG00000287181	AC107067.2	novel transcript	lncRNA	Delta_over_HC	3.78828836063352	0.00100995207018117	3.35008767161528
ENSG00000287188	AC068989.1	novel transcript, antisense to ANXA10	lncRNA	Delta_over_HC	1.97646586798384	0.00485325972616886	11.0356632885958
ENSG00000287216	AC106865.2	novel transcript, antisense to KIAA0922	lncRNA	Delta_over_HC	2.20273662098735	0.0495112990170483	3.75450558535414
ENSG00000288560	AL360015.1	novel transcript	lncRNA	Delta_over_HC	2.51848211244008	0.0305597376669187	3.24672248649557
ENSG00000288738		novel transcript	lncRNA	Delta_over_HC	1.0758126375883	0.0465808711357759	9.08316766776115
ENSG00000289581		novel transcript, sense intronic to RGL1	lncRNA	Delta_over_HC	1.75661173471612	0.0305321632049318	3.15055165051972
