# Supplementary material for: Differential Type-I Interferon Response in Buffy Coat Transcriptome of Individuals Infected with SARS-CoV-2 Gamma and Delta Variants
Source: Int J Mol Sci. 2023 Aug 24;24(17):13146. doi: 10.3390/ijms241713146 (PMC10487928; doi:10.3390/ijms241713146)
Supplement: Supplementary file 1 [file ijms-24-13146-s001.zip › Supplementary table 4.xlsx]

## Sheet: Delta down
Supplementary Table 4. Downregulated differentially expressed genes in Delta transcriptome.				Expression
id ensembl	Gene name	Description	Gene Type	Contrast	log2fc	padj	abundance
ENSG00000007866	TEAD3	TEA domain transcription factor 3	protein_coding	Delta_over_HC	-1.532198095824	0.170282516327649	2.92808857116376
ENSG00000011201	ANOS1	anosmin 1	protein_coding	Delta_over_HC	-2.36533666266782	0.0792747303366476	3.5404028613319
ENSG00000041515	MYO16	myosin XVI	protein_coding	Delta_over_HC	-1.43429391199308	0.265733581041634	8.01024459335708
ENSG00000068615	REEP1	receptor accessory protein 1	protein_coding	Delta_over_HC	-1.71298981399865	0.255649310962496	11.6091730612085
ENSG00000072133	RPS6KA6	ribosomal protein S6 kinase A6	protein_coding	Delta_over_HC	-1.15202474876742	0.4380050215597	2.70869970822613
ENSG00000073150	PANX2	pannexin 2	protein_coding	Delta_over_HC	-1.03769608642038	0.0666580999066298	252.860120650323
ENSG00000078399	HOXA9	homeobox A9	protein_coding	Delta_over_HC	-1.03515494039653	0.309488401136076	4.16341400921046
ENSG00000086967	MYBPC2	myosin binding protein C2	protein_coding	Delta_over_HC	-1.05086105360586	0.400473465133111	5.74238892384199
ENSG00000089472	HEPH	hephaestin	protein_coding	Delta_over_HC	-1.22914731448885	0.652585654513215	5.19494290187452
ENSG00000091181	IL5RA	interleukin 5 receptor subunit alpha	protein_coding	Delta_over_HC	-1.3696782335134	0.23154357196084	293.318218045753
ENSG00000092200	RPGRIP1	RPGR interacting protein 1	protein_coding	Delta_over_HC	-1.00236093035527	0.0524103818231997	78.186737178057
ENSG00000099866	MADCAM1	mucosal vascular addressin cell adhesion molecule 1	protein_coding	Delta_over_HC	-1.10665805920983	0.225480684984204	10.7037160642676
ENSG00000099998	GGT5	gamma-glutamyltransferase 5	protein_coding	Delta_over_HC	-1.68751034884643	0.16201620246826	7.52592953643146
ENSG00000100473	COCH	cochlin	protein_coding	Delta_over_HC	-1.13915196367963	0.15750285599779	27.3377404053559
ENSG00000100558	PLEK2	pleckstrin 2	protein_coding	Delta_over_HC	-1.03364459148756	0.0909465123732758	91.4698504482027
ENSG00000101292	PROKR2	prokineticin receptor 2	protein_coding	Delta_over_HC	-2.7560784242902	0.0687030787414258	2.71744939164274
ENSG00000102837	OLFM4	olfactomedin 4	protein_coding	Delta_over_HC	-1.42448650595278	0.16621705176417	38.6505546567043
ENSG00000102904	TSNAXIP1	translin associated factor X interacting protein 1	protein_coding	Delta_over_HC	-1.20131731602865	0.193383338201749	3.37856319147806
ENSG00000104522	GFUS	GDP-L-fucose synthase	protein_coding	Delta_over_HC	-1.00868549800546	0.063924180667393	389.370210975977
ENSG00000104941	RSPH6A	radial spoke head 6 homolog A	protein_coding	Delta_over_HC	-1.14288532492498	0.419939706810911	2.48729603225771
ENSG00000105609	LILRB5	leukocyte immunoglobulin like receptor B5	protein_coding	Delta_over_HC	-1.33619582570978	0.234421573379406	32.9936692080645
ENSG00000112183	RBM24	RNA binding motif protein 24	protein_coding	Delta_over_HC	-1.40118535529808	0.403051849417801	2.51744811335834
ENSG00000114204	SERPINI2	serpin family I member 2	protein_coding	Delta_over_HC	-1.12222410021836	0.250720591383045	3.441369947903
ENSG00000115457	IGFBP2	insulin like growth factor binding protein 2	protein_coding	Delta_over_HC	-1.81101337262297	0.296596118704499	5.88673860844213
ENSG00000116014	KISS1R	KISS1 receptor	protein_coding	Delta_over_HC	-2.2071723553811	0.100183119719611	2.74186351823884
ENSG00000116117	PARD3B	par-3 family cell polarity regulator beta	protein_coding	Delta_over_HC	-1.64854356661929	0.0805310801626836	10.5447421096378
ENSG00000117791	MTARC2	mitochondrial amidoxime reducing component 2	protein_coding	Delta_over_HC	-1.01764976808976	0.451502172175298	3.5672318611168
ENSG00000118520	ARG1	arginase 1	protein_coding	Delta_over_HC	-1.10838670531145	0.211481434966637	105.924239908595
ENSG00000118523	CCN2	cellular communication network factor 2	protein_coding	Delta_over_HC	-1.39603092116476	0.39756961954781	2.50224442196048
ENSG00000118898	PPL	periplakin	protein_coding	Delta_over_HC	-1.22133136915154	0.431130661491027	3.20525721463339
ENSG00000120659	TNFSF11	TNF superfamily member 11	protein_coding	Delta_over_HC	-2.04327240997304	0.0717981898402397	3.62394807740526
ENSG00000121690	DEPDC7	DEP domain containing 7	protein_coding	Delta_over_HC	-1.04837672629512	0.112527737354553	7.19813394694514
ENSG00000121742	GJB6	gap junction protein beta 6	protein_coding	Delta_over_HC	-1.29294665778934	0.232514228826051	13.2692397633995
ENSG00000122861	PLAU	plasminogen activator, urokinase	protein_coding	Delta_over_HC	-1.15641585360959	0.180225639778818	9.73149165854303
ENSG00000123119	NECAB1	N-terminal EF-hand calcium binding protein 1	protein_coding	Delta_over_HC	-1.90491743508219	0.382068109438279	2.90200341529784
ENSG00000124233	SEMG1	semenogelin 1	protein_coding	Delta_over_HC	-1.74166772630588	0.126053250073298	5.04521343053962
ENSG00000124875	CXCL6	C-X-C motif chemokine ligand 6	protein_coding	Delta_over_HC	-1.00208700185896	0.192752409460117	12.1137750671573
ENSG00000125804	FAM182A	family with sequence similarity 182 member A	lncRNA	Delta_over_HC	-1.59981322950512	0.293517999576003	3.86151390644601
ENSG00000126266	FFAR1	free fatty acid receptor 1	protein_coding	Delta_over_HC	-2.59382812468439	0.0756089647210941	3.26187605186564
ENSG00000129038	LOXL1	lysyl oxidase like 1	protein_coding	Delta_over_HC	-1.02787913986639	0.294101837766958	14.5681056859505
ENSG00000132563	REEP2	receptor accessory protein 2	protein_coding	Delta_over_HC	-1.95604335477585	0.0637669373038832	2.86320541640462
ENSG00000133055	MYBPH	myosin binding protein H	protein_coding	Delta_over_HC	-1.66544889075825	0.0840891199751805	12.592481984879
ENSG00000133169	BEX1	brain expressed X-linked 1	protein_coding	Delta_over_HC	-1.85596223561142	0.184352108874602	2.55199335311065
ENSG00000133454	MYO18B	myosin XVIIIB	protein_coding	Delta_over_HC	-1.3244321769604	0.38566519882357	5.41520455999427
ENSG00000133742	CA1	carbonic anhydrase 1	protein_coding	Delta_over_HC	-1.40024896703471	0.052228959359254	677.722802909743
ENSG00000134121	CHL1	cell adhesion molecule L1 like	protein_coding	Delta_over_HC	-1.20529717357936	0.177726329487771	9.78153711862017
ENSG00000134138	MEIS2	Meis homeobox 2	protein_coding	Delta_over_HC	-1.2800468714715	0.285002586715418	3.59575605738074
ENSG00000134184	GSTM1	glutathione S-transferase mu 1	protein_coding	Delta_over_HC	-1.80016347921192	0.533126529740378	57.9643124957259
ENSG00000134201	GSTM5	glutathione S-transferase mu 5	protein_coding	Delta_over_HC	-1.48352569063698	0.265540748701047	2.42195149506179
ENSG00000134463	ECHDC3	enoyl-CoA hydratase domain containing 3	protein_coding	Delta_over_HC	-1.01360849554571	0.106130512942207	27.0487411604601
ENSG00000134489	HRH4	histamine receptor H4	protein_coding	Delta_over_HC	-1.0617831320138	0.118728277870473	113.440143896998
ENSG00000134755	DSC2	desmocollin 2	protein_coding	Delta_over_HC	-1.67441433731795	0.0993028801214767	607.767999309043
ENSG00000136999	CCN3	cellular communication network factor 3	protein_coding	Delta_over_HC	-1.0862313418829	0.20117960998193	100.433737215988
ENSG00000137225	CAPN11	calpain 11	protein_coding	Delta_over_HC	-1.48916259383643	0.202332063880147	2.49773231272662
ENSG00000138115	CYP2C8	cytochrome P450 family 2 subfamily C member 8	protein_coding	Delta_over_HC	-1.03166918774543	0.456009185808342	3.06613342388396
ENSG00000140009	ESR2	estrogen receptor 2	protein_coding	Delta_over_HC	-1.16431988951674	0.162155741347697	6.0077509372622
ENSG00000140057	AK7	adenylate kinase 7	protein_coding	Delta_over_HC	-1.6816381072636	0.250668460286367	2.49747218145756
ENSG00000140932	CMTM2	CKLF like MARVEL transmembrane domain containing 2	protein_coding	Delta_over_HC	-1.11654169197246	0.0683433619122948	217.96674236957
ENSG00000141096	DPEP3	dipeptidase 3	protein_coding	Delta_over_HC	-1.02534729530473	0.101581811466294	68.2197257222928
ENSG00000142408	CACNG8	calcium voltage-gated channel auxiliary subunit gamma 8	protein_coding	Delta_over_HC	-1.20041405758831	0.204842108147936	24.4628311739252
ENSG00000143452	HORMAD1	HORMA domain containing 1	protein_coding	Delta_over_HC	-1.00392349001505	0.0672330117044207	63.0594762988827
ENSG00000145244	CORIN	corin, serine peptidase	protein_coding	Delta_over_HC	-1.26374600276662	0.157389848953766	11.1546666421612
ENSG00000146205	ANO7	anoctamin 7	protein_coding	Delta_over_HC	-1.54154180613539	0.207367954406384	3.27485380722525
ENSG00000146592	CREB5	cAMP responsive element binding protein 5	protein_coding	Delta_over_HC	-1.06009326819101	0.0883770989096586	3404.28693024705
ENSG00000147642	SYBU	syntabulin	protein_coding	Delta_over_HC	-2.5153902278282	0.0630302268452496	2.82752303364806
ENSG00000148344	PTGES	prostaglandin E synthase	protein_coding	Delta_over_HC	-1.71497116771824	0.291639514925422	3.05282410930998
ENSG00000150556	LYPD6B	LY6/PLAUR domain containing 6B	protein_coding	Delta_over_HC	-1.22205464206412	0.329446662601847	3.56545547975839
ENSG00000150764	DIXDC1	DIX domain containing 1	protein_coding	Delta_over_HC	-1.045219027937	0.141396715933671	27.5242468217824
ENSG00000152767	FARP1	FERM, ARH/RhoGEF and pleckstrin domain protein 1	protein_coding	Delta_over_HC	-1.62878351718767	0.0706989396943105	3.22640288801352
ENSG00000152785	BMP3	bone morphogenetic protein 3	protein_coding	Delta_over_HC	-1.04023525526986	0.374268399187465	9.33963916227411
ENSG00000152932	RAB3C	RAB3C, member RAS oncogene family	protein_coding	Delta_over_HC	-1.35048771860707	0.0701429995730348	5.16312452472024
ENSG00000154319	FAM167A	family with sequence similarity 167 member A	protein_coding	Delta_over_HC	-1.28344674765275	0.200169035382993	22.0525599073114
ENSG00000154330	PGM5	phosphoglucomutase 5	protein_coding	Delta_over_HC	-1.87149018392651	0.0807352406538999	55.6215327272828
ENSG00000154380	ENAH	ENAH actin regulator	protein_coding	Delta_over_HC	-1.06799187795934	0.0533980914192053	8.8826309362656
ENSG00000155659	VSIG4	V-set and immunoglobulin domain containing 4	protein_coding	Delta_over_HC	-1.0208679801469	0.445670037755807	14.4083935541571
ENSG00000158482	SNX29P1	sorting nexin 29 pseudogene 1	unprocessed_pseudogene	Delta_over_HC	-1.09514911345908	0.145790768565673	10.4394041793094
ENSG00000159556	ISL2	ISL LIM homeobox 2	protein_coding	Delta_over_HC	-1.05798665608184	0.184442227988946	21.8615680662876
ENSG00000159625	DRC7	dynein regulatory complex subunit 7	protein_coding	Delta_over_HC	-1.09424350494362	0.0870672370397453	10.6647248830487
ENSG00000160180	TFF3	trefoil factor 3	protein_coding	Delta_over_HC	-1.00783185308822	0.593397625156077	3.08103110679483
ENSG00000160201	U2AF1	U2 small nuclear RNA auxiliary factor 1	protein_coding	Delta_over_HC	-1.01642817812025	0.480271352427061	109.27465839261
ENSG00000160221	GATD3A	glutamine amidotransferase class 1 domain containing 3A	protein_coding	Delta_over_HC	-1.92566636970718	0.390925967231988	15.2073084933156
ENSG00000161055	SCGB3A1	secretoglobin family 3A member 1	protein_coding	Delta_over_HC	-2.98798320193024	0.0655468779027046	6.14268240226821
ENSG00000161905	ALOX15	arachidonate 15-lipoxygenase	protein_coding	Delta_over_HC	-1.21615004203354	0.52494352271435	281.184567210302
ENSG00000162551	ALPL	alkaline phosphatase, biomineralization associated	protein_coding	Delta_over_HC	-1.56992922982285	0.206075338707759	3318.00153284907
ENSG00000162631	NTNG1	netrin G1	protein_coding	Delta_over_HC	-1.38174978993058	0.237275256321818	3.06324246693058
ENSG00000163083	INHBB	inhibin subunit beta B	protein_coding	Delta_over_HC	-1.62749289383231	0.203277838225857	9.4420263180711
ENSG00000163221	S100A12	S100 calcium binding protein A12	protein_coding	Delta_over_HC	-1.29742202519159	0.109010804230873	938.112671652961
ENSG00000163827	LRRC2	leucine rich repeat containing 2	protein_coding	Delta_over_HC	-1.52179539629993	0.0791754708342372	8.36417366628238
ENSG00000163958	ZDHHC19	zinc finger DHHC-type palmitoyltransferase 19	protein_coding	Delta_over_HC	-1.84247394811775	0.091975624023205	16.8452036870825
ENSG00000163993	S100P	S100 calcium binding protein P	protein_coding	Delta_over_HC	-1.30677928671747	0.259994097374975	295.150229138114
ENSG00000164929	BAALC	BAALC binder of MAP3K1 and KLF4	protein_coding	Delta_over_HC	-1.08200579124277	0.544473545123422	3.50664593242496
ENSG00000165626	BEND7	BEN domain containing 7	protein_coding	Delta_over_HC	-1.19946886658026	0.176584613397332	30.0131303362276
ENSG00000165868	HSPA12A	heat shock protein family A (Hsp70) member 12A	protein_coding	Delta_over_HC	-1.20862912449537	0.068066661581303	13.4628346438203
ENSG00000166033	HTRA1	HtrA serine peptidase 1	protein_coding	Delta_over_HC	-1.08862124034832	0.412096576279096	4.7574919520738
ENSG00000166736	HTR3A	5-hydroxytryptamine receptor 3A	protein_coding	Delta_over_HC	-2.37300056627648	0.107780066194491	2.54737261487014
ENSG00000166947	EPB42	erythrocyte membrane protein band 4.2	protein_coding	Delta_over_HC	-1.31181824120292	0.0598146950846919	521.675286620957
ENSG00000167306	MYO5B	myosin VB	protein_coding	Delta_over_HC	-1.26923688583062	0.274554265695726	4.12272603809016
ENSG00000167992	VWCE	von Willebrand factor C and EGF domains	protein_coding	Delta_over_HC	-1.03336650972171	0.378955720806416	159.895254083383
ENSG00000168004	PLAAT5	phospholipase A and acyltransferase 5	protein_coding	Delta_over_HC	-1.01072867871518	0.381575701484345	11.764926107177
ENSG00000168386	FILIP1L	filamin A interacting protein 1 like	protein_coding	Delta_over_HC	-1.39157793947277	0.0593206529343727	4.2576498538797
ENSG00000169902	TPST1	tyrosylprotein sulfotransferase 1	protein_coding	Delta_over_HC	-1.16588789066703	0.111765246563588	128.973364516847
ENSG00000171798	KNDC1	kinase non-catalytic C-lobe domain containing 1	protein_coding	Delta_over_HC	-1.04559257287264	0.324720559141663	29.331081721968
ENSG00000172014	ANKRD20A4P	ankyrin repeat domain 20 family member A4, pseudogene	protein_coding	Delta_over_HC	-1.12448131297978	0.465160237557863	3.44802722847716
ENSG00000172367	PDZD3	PDZ domain containing 3	protein_coding	Delta_over_HC	-1.23293332630836	0.0847549004636659	10.9452577741752
ENSG00000174326	SLC16A11	solute carrier family 16 member 11	protein_coding	Delta_over_HC	-1.02713324772908	0.157634710139027	8.40599387710594
ENSG00000175445	LPL	lipoprotein lipase	protein_coding	Delta_over_HC	-1.51028807358375	0.210814558249232	11.9369755711004
ENSG00000175874	CREG2	cellular repressor of E1A stimulated genes 2	protein_coding	Delta_over_HC	-1.82698832888422	0.0806083766664756	3.14312847636148
ENSG00000176788	BASP1	brain abundant membrane attached signal protein 1	protein_coding	Delta_over_HC	-1.15852544087296	0.105417736464153	2560.90672988158
ENSG00000177590	GIMAP3P	GTPase, IMAP family member 3 pseudogene	processed_pseudogene	Delta_over_HC	-1.01977610405394	0.633647181404672	2.47447393091669
ENSG00000177807	KCNJ10	potassium inwardly rectifying channel subfamily J member 10	protein_coding	Delta_over_HC	-1.42862063984617	0.582153036156429	3.03492659659884
ENSG00000178429	RPS3AP5	RPS3A pseudogene 5	processed_pseudogene	Delta_over_HC	-1.0841150649735	0.19842614710547	10.8485717898805
ENSG00000178458	H3P16	H3 histone pseudogene 16	processed_pseudogene	Delta_over_HC	-1.08317736718496	0.104163253450998	10.0409868662395
ENSG00000178752	ERFE	erythroferrone	protein_coding	Delta_over_HC	-1.30851811989323	0.411439181459756	4.03183414788183
ENSG00000179097	HTR1F	5-hydroxytryptamine receptor 1F	protein_coding	Delta_over_HC	-1.6216458841863	0.13192953779869	2.8137140397293
ENSG00000179299	NSUN7	NOP2/Sun RNA methyltransferase family member 7	protein_coding	Delta_over_HC	-1.03593096609213	0.0646463935141481	104.8651913089
ENSG00000180209	MYLPF	myosin light chain, phosphorylatable, fast skeletal muscle	protein_coding	Delta_over_HC	-1.07363292762831	0.267921976110763	3.27879661552569
ENSG00000180409	OR10AA1P	olfactory receptor family 10 subfamily AA member 1 pseudogene	unprocessed_pseudogene	Delta_over_HC	-1.01842548736778	0.34849465410165	3.84637659663849
ENSG00000180581	SRP9P1	signal recognition particle 9 pseudogene 1	processed_pseudogene	Delta_over_HC	-1.11303339305257	0.265210987133873	2.84384506921938
ENSG00000180730	SHISA2	shisa family member 2	protein_coding	Delta_over_HC	-1.71162990787984	0.168227082053143	4.34503790975122
ENSG00000181143	MUC16	mucin 16, cell surface associated	protein_coding	Delta_over_HC	-1.47128032321874	0.150470557357992	9.55630571773442
ENSG00000181409	AATK	apoptosis associated tyrosine kinase	protein_coding	Delta_over_HC	-1.00591876743544	0.127511887763336	1216.33840776305
ENSG00000182389	CACNB4	calcium voltage-gated channel auxiliary subunit beta 4	protein_coding	Delta_over_HC	-1.22762037924574	0.119450790348844	111.759881336425
ENSG00000182512	GLRX5	glutaredoxin 5	protein_coding	Delta_over_HC	-1.08782565229045	0.0521757748666233	1009.88548148216
ENSG00000182580	EPHB3	EPH receptor B3	protein_coding	Delta_over_HC	-1.02828242621762	0.305064687494584	11.4354923725106
ENSG00000182809	CRIP2	cysteine rich protein 2	protein_coding	Delta_over_HC	-1.05845939758157	0.0798880413814737	38.8313753061306
ENSG00000182885	ADGRG3	adhesion G protein-coupled receptor G3	protein_coding	Delta_over_HC	-1.0351838350828	0.141136129853057	1611.86256444551
ENSG00000183018	SPNS2	sphingolipid transporter 2	protein_coding	Delta_over_HC	-1.13758340875612	0.0573761435080519	13.9618572656987
ENSG00000183298	RPSAP19	ribosomal protein SA pseudogene 19	processed_pseudogene	Delta_over_HC	-1.36725587631063	0.359874050279275	10.095980607181
ENSG00000183762	KREMEN1	kringle containing transmembrane protein 1	protein_coding	Delta_over_HC	-1.84141029220872	0.0534562918441018	630.158755219653
ENSG00000183960	KCNH8	potassium voltage-gated channel subfamily H member 8	protein_coding	Delta_over_HC	-1.14056444695831	0.109619752524424	33.915079961562
ENSG00000184106	TREML3P	triggering receptor expressed on myeloid cells like 3, pseudogene	transcribed_unprocessed_pseudogene	Delta_over_HC	-1.38656875444387	0.0560292137463005	56.1141596515079
ENSG00000184292	TACSTD2	tumor associated calcium signal transducer 2	protein_coding	Delta_over_HC	-1.37089103687612	0.282278203185622	9.7609604157254
ENSG00000184612	RPL7P26	ribosomal protein L7 pseudogene 26	processed_pseudogene	Delta_over_HC	-1.57317335687614	0.307472982004906	2.54552916563673
ENSG00000184792	OSBP2	oxysterol binding protein 2	protein_coding	Delta_over_HC	-1.01459010202011	0.20117960998193	882.291641290735
ENSG00000185483	ROR1	receptor tyrosine kinase like orphan receptor 1	protein_coding	Delta_over_HC	-1.03959262017031	0.433855891649301	3.97447862584647
ENSG00000185666	SYN3	synapsin III	protein_coding	Delta_over_HC	-1.13625840478702	0.243291834155032	7.1521376600167
ENSG00000185736	ADARB2	adenosine deaminase RNA specific B2 (inactive)	protein_coding	Delta_over_HC	-1.46347644335845	0.706515485694104	28.8412700865174
ENSG00000188396	DYNLT4	dynein light chain Tctex-type 4	protein_coding	Delta_over_HC	-1.45214722849594	0.0608377184874588	9.28688990015447
ENSG00000188459	WASF4P	WASP family member 4, pseudogene	processed_pseudogene	Delta_over_HC	-1.34019793090583	0.196200717620822	3.76864875538526
ENSG00000188659	SAXO2	stabilizer of axonemal microtubules 2	protein_coding	Delta_over_HC	-2.40773978647441	0.111241473194746	18.8077069303902
ENSG00000189337	KAZN	kazrin, periplakin interacting protein	protein_coding	Delta_over_HC	-1.63179710764729	0.0562056555970893	82.9819040814285
ENSG00000189410	SH2D5	SH2 domain containing 5	protein_coding	Delta_over_HC	-1.02717806655793	0.239051772231769	4.12626017275732
ENSG00000196549	MME	membrane metalloendopeptidase	protein_coding	Delta_over_HC	-1.06911048524674	0.0830677647356545	4495.13813956162
ENSG00000196632	WNK3	WNK lysine deficient protein kinase 3	protein_coding	Delta_over_HC	-1.28209478616061	0.214986324183673	2.72814438539593
ENSG00000197454	OR2L5	olfactory receptor family 2 subfamily L member 5	protein_coding	Delta_over_HC	-1.21566241839998	0.359157978805631	2.868142055298
ENSG00000197582	GPX1P1	glutathione peroxidase pseudogene 1	processed_pseudogene	Delta_over_HC	-1.11376364185315	0.56278693229313	32.5067152837885
ENSG00000197888	UGT2B17	UDP glucuronosyltransferase family 2 member B17	protein_coding	Delta_over_HC	-1.79372957521232	0.19725956452419	4.76382709788571
ENSG00000198216	CACNA1E	calcium voltage-gated channel subunit alpha1 E	protein_coding	Delta_over_HC	-1.2393312349715	0.247753369297295	179.403374956091
ENSG00000198237	GUSBP13	GUSB pseudogene 13	unprocessed_pseudogene	Delta_over_HC	-1.41963943532284	0.225057240212191	3.10439464785434
ENSG00000198795	ZNF521	zinc finger protein 521	protein_coding	Delta_over_HC	-1.01570488924013	0.374268399187465	5.64544677542199
ENSG00000199090	MIR326	microRNA 326	miRNA	Delta_over_HC	-1.05209398241336	0.286083875323369	4.05217923955462
ENSG00000199562	RNU6-37P	RNA, U6 small nuclear 37, pseudogene	snRNA	Delta_over_HC	-1.09154916551053	0.310305088013645	2.56069052503733
ENSG00000200164	Y_RNA	Y RNA	misc_RNA	Delta_over_HC	-1.64767235990609	0.084416772947754	3.2607475887405
ENSG00000201077	RNU6-188P	RNA, U6 small nuclear 188, pseudogene	snRNA	Delta_over_HC	-1.00729101821771	0.215720235881137	4.53604284642391
ENSG00000201367	RNU6-522P	RNA, U6 small nuclear 522, pseudogene	snRNA	Delta_over_HC	-1.13111379489594	0.125302287199442	9.93836035168438
ENSG00000201498	Y_RNA	Y RNA	misc_RNA	Delta_over_HC	-1.30521549312868	0.261873168847233	8.80295986840819
ENSG00000203395	AC015969.1	novel transcript, antisense to PLEK	lncRNA	Delta_over_HC	-1.49493765175864	0.195117663630509	2.70498859352329
ENSG00000203710	CR1	complement C3b/C4b receptor 1 (Knops blood group)	protein_coding	Delta_over_HC	-1.1169122827008	0.0559157186451702	2693.90808443711
ENSG00000204283	LINC01973	long intergenic non-protein coding RNA 1973	lncRNA	Delta_over_HC	-1.53134175145422	0.0914071623099006	11.5010342776137
ENSG00000204345	CD300LD	CD300 molecule like family member d	protein_coding	Delta_over_HC	-2.36408336134089	0.0506154860453677	11.6298119179658
ENSG00000204625	HCG9	HLA complex group 9	lncRNA	Delta_over_HC	-1.1965640308481	0.282278203185622	5.60236331438801
ENSG00000204644	ZFP57	ZFP57 zinc finger protein	protein_coding	Delta_over_HC	-3.11273745555642	0.451502172175298	12.0027880047379
ENSG00000205871	RPS3AP47	RPS3A pseudogene 47	processed_pseudogene	Delta_over_HC	-1.4365353891437	0.165808010639895	5.7681796943398
ENSG00000206775	SNORD37	small nucleolar RNA, C/D box 37	snoRNA	Delta_over_HC	-1.14049571716945	0.552663848280861	2.94758578648407
ENSG00000207561	MIR635	microRNA 635	miRNA	Delta_over_HC	-1.63777061751296	0.0908379634896962	2.54587689625164
ENSG00000207736	MIR657	microRNA 657	miRNA	Delta_over_HC	-1.08186619855236	0.229694276018493	7.66804437742329
ENSG00000207763	MIR617	microRNA 617	miRNA	Delta_over_HC	-1.03442625342599	0.377694363037911	3.26352192754682
ENSG00000208022	MIR618	microRNA 618	miRNA	Delta_over_HC	-1.52369416625204	0.164969399486361	2.91316045852038
ENSG00000211813	TRAV34	T cell receptor alpha variable 34	TR_V_gene	Delta_over_HC	-1.092964117029	0.403082077705101	2.93787510503336
ENSG00000211930	IGHD3-3	immunoglobulin heavy diversity 3-3	IG_D_gene	Delta_over_HC	-1.96574192490606	0.172905058479673	2.60399688453326
ENSG00000211935	IGHV1-3	immunoglobulin heavy variable 1-3	IG_V_gene	Delta_over_HC	-1.59246155348533	0.253053453861017	58.0496367404965
ENSG00000211978	IGHV5-78	immunoglobulin heavy variable 5-78 (pseudogene)	IG_V_pseudogene	Delta_over_HC	-1.33444502686786	0.153462605027682	5.94091381125862
ENSG00000212549	RNA5SP354	RNA, 5S ribosomal pseudogene 354	rRNA_pseudogene	Delta_over_HC	-1.10668212929128	0.289319349381784	2.52686445609584
ENSG00000212567	AC008810.1		snoRNA	Delta_over_HC	-1.17976986694672	0.106041319887252	4.88102541101368
ENSG00000213280	AC090114.1	ribosomal protein S10 (RPS10) pseudogene	processed_pseudogene	Delta_over_HC	-1.11791616523596	0.366017356813353	2.52522476376629
ENSG00000213386	AC022217.1	family with sequence similarity 58, member A (FAM58A) pseudogene	processed_pseudogene	Delta_over_HC	-1.14343277316204	0.111513239639397	4.5730890651959
ENSG00000213757	RPS3AP20	RPS3A pseudogene 20	processed_pseudogene	Delta_over_HC	-1.38731583412726	0.329232541247856	5.36578378439729
ENSG00000213772	EIF1P7	eukaryotic translation initiation factor 1 pseudogene 7	processed_pseudogene	Delta_over_HC	-1.13618534356591	0.176479952761753	5.15394783722456
ENSG00000214203	RPS4XP1	ribosomal protein S4X pseudogene 1	processed_pseudogene	Delta_over_HC	-1.13824106321054	0.0637898971808635	6.22464659535386
ENSG00000214548	MEG3	maternally expressed 3	lncRNA	Delta_over_HC	-2.33250120522864	0.0586143192457321	3.98457322873792
ENSG00000214784	RPS3AP21	RPS3A pseudogene 21	processed_pseudogene	Delta_over_HC	-1.02122866787642	0.265718048438567	8.12528558468743
ENSG00000214892	USP8P1	USP8 pseudogene 1	processed_pseudogene	Delta_over_HC	-1.07603484976026	0.300059508319544	2.77583243258273
ENSG00000215196	BASP1-AS1	BASP1 antisense RNA 1	lncRNA	Delta_over_HC	-1.24745058261031	0.218432882618677	43.9560996791412
ENSG00000217416	ISCA1P1	iron-sulfur cluster assembly 1 pseudogene 1	processed_pseudogene	Delta_over_HC	-1.55765742808048	0.174665965845472	2.39922437727572
ENSG00000219133	AL592114.1	ribosomal protein L21 (RPL21) pseudogene	processed_pseudogene	Delta_over_HC	-1.00867023207103	0.222744233236175	4.7786517965815
ENSG00000221882	OR3A2	olfactory receptor family 3 subfamily A member 2	protein_coding	Delta_over_HC	-1.73004648906851	0.143299311826183	4.37855565822512
ENSG00000222014	RAB6C	RAB6C, member RAS oncogene family	protein_coding	Delta_over_HC	-2.48867201757771	0.27824100903851	2.91267497272662
ENSG00000224388	BACE2-IT1	BACE2 intronic transcript 1	lncRNA	Delta_over_HC	-1.31725237701856	0.0990738351979862	5.04624789723212
ENSG00000224606	TGFA-IT1	TGFA intronic transcript 1	lncRNA	Delta_over_HC	-1.14684805153496	0.231339927947869	4.03729775944102
ENSG00000224769	MUC20P1	mucin 20, cell surface associated pseudogene 1	unprocessed_pseudogene	Delta_over_HC	-1.12339922150628	0.310557608994799	6.65163238504423
ENSG00000224977	LINC02776	long intergenic non-protein coding RNA 2776	lncRNA	Delta_over_HC	-1.56970558234242	0.131689774529535	3.96185274024902
ENSG00000225031	EIF4BP7	eukaryotic translation initiation factor 4B pseudogene 7	processed_pseudogene	Delta_over_HC	-1.04496534029348	0.0950203295219045	9.50404992589282
ENSG00000225313	AL513327.1	novel transcript	lncRNA	Delta_over_HC	-1.21770301691332	0.345258696955676	2.95467834288603
ENSG00000225422	RBMS1P1	RNA binding motif single stranded interacting protein 1 pseudogene 1	processed_pseudogene	Delta_over_HC	-1.1726957009111	0.0928703769884246	4.7565116890707
ENSG00000225544	AC245452.1	pseudogene similar to part of metallophosphoesterase 1 (MPPE1)	processed_pseudogene	Delta_over_HC	-2.39036422792488	0.116812796803023	4.04485608926271
ENSG00000225698	IGHV3-72	immunoglobulin heavy variable 3-72	IG_V_gene	Delta_over_HC	-1.05557893955473	0.506785543269071	41.0512304815539
ENSG00000225726	AC007000.3	pseudogene similar to part of SWI/SNF related, matrix associated, actin dependent regulator of chromatin, subfamily a, member 1 SMARCA1	processed_pseudogene	Delta_over_HC	-1.20428749720643	0.0808155595274192	5.79186605703076
ENSG00000225850	AL355490.1	novel transcript	lncRNA	Delta_over_HC	-1.13508216478418	0.379178187050067	4.64145679006539
ENSG00000226026	AC092802.1	novel transcript	lncRNA	Delta_over_HC	-1.1980956237113	0.202332063880147	3.35550496586459
ENSG00000226117	AC090844.1	ribosomal protein L39 (RPL39) pseudogene	processed_pseudogene	Delta_over_HC	-1.00997926482776	0.435769943437006	2.92219992667164
ENSG00000226320	LINC01811	long intergenic non-protein coding RNA 1811	lncRNA	Delta_over_HC	-1.09186032670009	0.320498910623743	6.60677965158399
ENSG00000226337	TMEM252-DT	TMEM252 divergent transcript	lncRNA	Delta_over_HC	-1.07402696935402	0.209378956503271	6.05508164785469
ENSG00000226436	H3P43	H3 histone pseudogene 43	processed_pseudogene	Delta_over_HC	-1.12482246484723	0.304060075766617	2.66788967937353
ENSG00000226839	MTND6P11	MT-ND6 pseudogene 11	processed_pseudogene	Delta_over_HC	-1.53754100559077	0.119157554406388	6.9508162336019
ENSG00000226918	AC010086.1	RNA binding motif protein, Y-linked, family 1, member A1 (RBMY1A1) pseudogene	unprocessed_pseudogene	Delta_over_HC	-1.08810275165577	0.602329727122368	3.35782552990893
ENSG00000227331	RPL7AP22	ribosomal protein L7a pseudogene 22	processed_pseudogene	Delta_over_HC	-1.19903927439545	0.349793414495689	3.38907710210051
ENSG00000228252	COL6A4P2	collagen type VI alpha 4 pseudogene 2	transcribed_unitary_pseudogene	Delta_over_HC	-1.29329680977688	0.191407776588716	2.89534589063044
ENSG00000229093	OR51AB1P	olfactory receptor family 51 subfamily AB member 1 pseudogene	unprocessed_pseudogene	Delta_over_HC	-1.42798905919918	0.214942359103675	3.20031082518401
ENSG00000229162	RUNX3-AS1	RUNX3 antisense RNA 1	lncRNA	Delta_over_HC	-1.8049749428429	0.128257662658112	2.81893049110312
ENSG00000229271	AC091493.1	novel transcript	lncRNA	Delta_over_HC	-2.51369856938491	0.0579970386457149	3.33044242586255
ENSG00000229453	SPINK8	serine peptidase inhibitor Kazal type 8 (putative)	protein_coding	Delta_over_HC	-1.19557761894493	0.30183010858596	4.68883293554275
ENSG00000230910	AL391807.1	novel transcript	lncRNA	Delta_over_HC	-1.237393457518	0.404355277111928	4.49008943944831
ENSG00000231313	CLIC1P1	chloride intracellular channel 1 pseudogene 1	processed_pseudogene	Delta_over_HC	-1.03549776408492	0.494590667477288	2.65060404426898
ENSG00000231362	AC069271.1	ribosomal protein L39 (RPL39) pseudogene	processed_pseudogene	Delta_over_HC	-1.2096290164992	0.267921976110763	2.66632860758189
ENSG00000231767	RPS27AP5	ribosomal protein S27a pseudogene 5	protein_coding	Delta_over_HC	-1.27951413632573	0.431765781679791	2.93444795629201
ENSG00000232254	CSF2RBP1	CSF2RB pseudogene 1	unprocessed_pseudogene	Delta_over_HC	-1.00098676055741	0.27024226462345	30.3956708100322
ENSG00000232300	FAM215B	family with sequence similarity 215 member B	lncRNA	Delta_over_HC	-1.18651834751342	0.610399040214353	5.18910078224242
ENSG00000232341	RPL4P2	ribosomal protein L4 pseudogene 2	processed_pseudogene	Delta_over_HC	-1.20276312529923	0.419799978727718	3.45919230142101
ENSG00000233013	FAM157B	family with sequence similarity 157 member B	transcribed_unprocessed_pseudogene	Delta_over_HC	-1.05923685329054	0.117808320102865	58.4054897017134
ENSG00000233098	CCDC144NL-AS1	CCDC144NL antisense RNA 1	lncRNA	Delta_over_HC	-1.49442840867914	0.176479952761753	3.61394198089822
ENSG00000233431	LINC02596	long intergenic non-protein coding RNA 2596	lncRNA	Delta_over_HC	-1.42342398848793	0.0970489050874119	44.7509731466516
ENSG00000233448	PMS2P9	PMS1 homolog 2, mismatch repair system component pseudogene 9	transcribed_unprocessed_pseudogene	Delta_over_HC	-1.14563957269435	0.325247636770026	3.36544380496401
ENSG00000233585	AC231533.2	acetyl-Coenzyme A acyltransferase 2 (mitochondrial 3-oxoacyl-Coenzyme A thiolase) (ACAA2) pseudogene	transcribed_processed_pseudogene	Delta_over_HC	-1.25427995950394	0.124640883741824	5.29534438886878
ENSG00000233828	MIR4280HG	MIR4280 host gene	lncRNA	Delta_over_HC	-1.24822678662265	0.338992813022666	3.01108268305628
ENSG00000233873	RPL7P44	ribosomal protein L7 pseudogene 44	processed_pseudogene	Delta_over_HC	-1.13269742006189	0.431710560143634	2.4594449676776
ENSG00000234337	AC026462.1	tropomyosin 1 (alpha) (TPM1) pseudogene	processed_pseudogene	Delta_over_HC	-1.02049851240657	0.458818072077064	3.15198054977033
ENSG00000234457	AC006960.1	ribosomal protein L39 (RPL39) pseudogene	processed_pseudogene	Delta_over_HC	-1.0787045530444	0.16303405674049	5.13994890134886
ENSG00000234648	AL162151.2	pseudogene similar to part of ribosomal protein L3 (RPL3)	processed_pseudogene	Delta_over_HC	-1.04742229720805	0.164041536938878	11.4336583091575
ENSG00000234785	EEF1GP5	eukaryotic translation elongation factor 1 gamma pseudogene 5	processed_pseudogene	Delta_over_HC	-1.00823067630866	0.432080077268354	3.31584030603104
ENSG00000234902	AC007879.3	novel transcript	lncRNA	Delta_over_HC	-1.29061336077419	0.104184590304783	7.46882299313856
ENSG00000234965	SHISA8	shisa family member 8	protein_coding	Delta_over_HC	-1.00285596822344	0.408395898649179	5.39341920399525
ENSG00000235105	AL356968.2	amyotrophic lateral sclerosis 2 (juvenile) chromosome region, candidate 2 (ALS2CR2) pseudogene	processed_pseudogene	Delta_over_HC	-1.34344773853231	0.106785812243924	15.7124662771729
ENSG00000235297	FAUP1	FAU pseudogene 1	processed_pseudogene	Delta_over_HC	-1.1739881518556	0.249526215965115	5.26368468405288
ENSG00000236242	MYO16-AS1	MYO16 antisense RNA 1	lncRNA	Delta_over_HC	-1.96003382920266	0.22424364877509	3.67893766169565
ENSG00000236411	NDUFAF4P3	NADH:ubiquinone oxidoreductase complex assembly factor 4 pseudogene 3	processed_pseudogene	Delta_over_HC	-1.17156988567869	0.0894648137653994	3.93289126262648
ENSG00000236512	AL390026.1	ribosomal protein L29 (RPL29) pseudogene	processed_pseudogene	Delta_over_HC	-1.05017150522441	0.443231984689708	3.56351587979015
ENSG00000237004	ZNRF2P1	zinc and ring finger 2 pseudogene 1	transcribed_processed_pseudogene	Delta_over_HC	-1.2288241633739	0.264315010477919	8.40955922256496
ENSG00000238009	AL627309.1	novel transcript	lncRNA	Delta_over_HC	-1.89496965845093	0.0951489268501084	10.0811233158738
ENSG00000238063	LINC01685	long intergenic non-protein coding RNA 1685	lncRNA	Delta_over_HC	-1.18785165314869	0.186555909395427	4.40462755148483
ENSG00000238269	PAGE2B	PAGE family member 2B	protein_coding	Delta_over_HC	-1.04476950543936	0.339124077235862	13.720257824389
ENSG00000240106	RN7SL146P	RNA, 7SL, cytoplasmic 146, pseudogene	misc_RNA	Delta_over_HC	-1.08122945694112	0.1753733486342	5.24415455477335
ENSG00000240540	RPL3P9	ribosomal protein L3 pseudogene 9	processed_pseudogene	Delta_over_HC	-1.05983057642223	0.365193278865272	3.93332761049309
ENSG00000242262	AC092597.1	ribosomal protein L15 (RPL15) pseudogene	processed_pseudogene	Delta_over_HC	-1.03496700171702	0.511841694508559	2.52837686886188
ENSG00000242611	AC093627.6	novel transcript	lncRNA	Delta_over_HC	-1.31923910244526	0.442035724465431	2.76420703031595
ENSG00000242766	IGKV1D-17	immunoglobulin kappa variable 1D-17	IG_V_gene	Delta_over_HC	-2.16596297842375	0.608180626728189	10.7701247367028
ENSG00000243064	ABCC13	ATP binding cassette subfamily C member 13 (pseudogene)	transcribed_unprocessed_pseudogene	Delta_over_HC	-1.00117078471666	0.0815021422481354	109.330748064014
ENSG00000243066	RN7SL842P	RNA, 7SL, cytoplasmic 842, pseudogene	misc_RNA	Delta_over_HC	-1.41624296968904	0.45772220320584	2.36578181492773
ENSG00000243438	LARP1BP2	LARP1B pseudogene 2	processed_pseudogene	Delta_over_HC	-1.06509419070121	0.360036139784441	4.61297848217904
ENSG00000244265	SIAH2-AS1	SIAH2 antisense RNA 1	lncRNA	Delta_over_HC	-1.41493584503227	0.374391150852453	2.98018980032732
ENSG00000245205	EEF1A1P4	eukaryotic translation elongation factor 1 alpha 1 pseudogene 4	processed_pseudogene	Delta_over_HC	-1.02957171399528	0.300339292948699	25.7227631582323
ENSG00000245812	LINC02202	long intergenic non-protein coding RNA 2202	lncRNA	Delta_over_HC	-1.35836899963642	0.249265339935233	3.39285763300651
ENSG00000247081	BAALC-AS1	BAALC antisense RNA 1	lncRNA	Delta_over_HC	-1.10011005850553	0.101501037952788	6.78884066264745
ENSG00000248546	ANP32C	acidic nuclear phosphoprotein 32 family member C	processed_pseudogene	Delta_over_HC	-1.1910336015578	0.57342722223645	2.47877140672606
ENSG00000248712	CCDC153	coiled-coil domain containing 153	protein_coding	Delta_over_HC	-1.03065777719055	0.196200717620822	14.6274047384358
ENSG00000248780	ARL4AP2	ADP ribosylation factor like GTPase 4A pseudogene 2	processed_pseudogene	Delta_over_HC	-1.26777715831046	0.301478123798608	2.95510555713185
ENSG00000249215	NCOA4P4	nuclear receptor coactivator 4 pseudogene 4	processed_pseudogene	Delta_over_HC	-1.18765126354734	0.248277785899065	5.55635192109888
ENSG00000249245	NCOA4P3	nuclear receptor coactivator 4 pseudogene 3	processed_pseudogene	Delta_over_HC	-1.36711581943708	0.163508951979165	3.5910667195788
ENSG00000250182	EEF1A1P13	eukaryotic translation elongation factor 1 alpha 1 pseudogene 13	processed_pseudogene	Delta_over_HC	-1.13648499706699	0.0996245830401136	58.2858203944843
ENSG00000250950	AC093752.2	novel transcript	lncRNA	Delta_over_HC	-1.07740070481309	0.0506154860453677	21.6936169567545
ENSG00000251039	IGKV2D-40	immunoglobulin kappa variable 2D-40	IG_V_gene	Delta_over_HC	-1.19770179719315	0.392566875079326	2.40018646344137
ENSG00000251093	AC093281.2	novel transcript	lncRNA	Delta_over_HC	-1.0109833247422	0.145790768565673	14.2093359589531
ENSG00000251127	AC091173.1	novel transcript	lncRNA	Delta_over_HC	-1.61058143657623	0.265703660231304	2.37670703207581
ENSG00000251333	RTN3P1	reticulon 3 pseudogene 1	processed_pseudogene	Delta_over_HC	-1.50977971364599	0.243291834155032	2.44665883576928
ENSG00000251348	HSPD1P11	heat shock protein family D (Hsp60) member 1 pseudogene 11	processed_pseudogene	Delta_over_HC	-1.14195898738095	0.246164297048589	5.28501129403643
ENSG00000252464	RN7SKP70	RN7SK pseudogene 70	misc_RNA	Delta_over_HC	-1.0138099113839	0.222703929599808	7.96853261749759
ENSG00000253005	RNU6-176P	RNA, U6 small nuclear 176, pseudogene	snRNA	Delta_over_HC	-1.08154412591565	0.0799397118300089	7.60991936471623
ENSG00000253008	MIR2355	microRNA 2355	miRNA	Delta_over_HC	-1.01081440874718	0.134403036474818	6.2358370794563
ENSG00000253559	OSGEPL1-AS1	OSGEPL1 antisense RNA 1	lncRNA	Delta_over_HC	-1.20639907160599	0.0817838198961253	4.86138346966076
ENSG00000253590	IGLV3-13	immunoglobulin lambda variable 3-13 (pseudogene)	IG_V_pseudogene	Delta_over_HC	-1.38216421616915	0.310136254525775	3.97955245691091
ENSG00000253616	AC107959.3	novel transcript	lncRNA	Delta_over_HC	-1.0396917787199	0.0539566303804629	47.0591849420147
ENSG00000254295	AC008429.3	novel transcript	lncRNA	Delta_over_HC	-1.04111619129872	0.0801554191381312	10.2532142262208
ENSG00000254349	MIR2052HG	MIR2052 host gene	lncRNA	Delta_over_HC	-1.65015794984169	0.615129979578865	2.71168044707922
ENSG00000254983	AC025300.1	novel transcript	lncRNA	Delta_over_HC	-1.20571275696862	0.403214440408435	2.48056244529047
ENSG00000255002	LINC02324	long intergenic non-protein coding RNA 2324	lncRNA	Delta_over_HC	-1.46490961777164	0.0717989206891778	9.22793947732952
ENSG00000255443	CD44-AS1	CD44 antisense RNA 1	lncRNA	Delta_over_HC	-1.16783045436564	0.343198495305932	2.63519544627703
ENSG00000257258	AC012150.1	novel transcript	lncRNA	Delta_over_HC	-1.27944402073428	0.229871029747869	3.47140468582249
ENSG00000257335	MGAM	maltase-glucoamylase	protein_coding	Delta_over_HC	-1.25027585263694	0.0573761435080519	4050.85161554496
ENSG00000257599	OVCH1-AS1	OVCH1 antisense RNA 1	lncRNA	Delta_over_HC	-1.00013479367161	0.268383922908646	63.9804044454957
ENSG00000258473	AC007686.2	novel transcript	lncRNA	Delta_over_HC	-2.60992963234781	0.0734749547088383	2.61570627776731
ENSG00000258476	LINC02207	long intergenic non-protein coding RNA 2207	lncRNA	Delta_over_HC	-1.28088719497484	0.0753597620689786	68.4058835114123
ENSG00000258791	LINC00520	long intergenic non-protein coding RNA 520	lncRNA	Delta_over_HC	-2.30341160310972	0.168260076753362	2.43318125407639
ENSG00000258831	AC103996.2	novel transcript	lncRNA	Delta_over_HC	-1.00515774563395	0.427486195404013	10.2306060341927
ENSG00000258976	AC013451.2	novel transcript	lncRNA	Delta_over_HC	-1.12158368135497	0.171524919571923	3.65085081838612
ENSG00000259070	LINC00639	long intergenic non-protein coding RNA 639	lncRNA	Delta_over_HC	-1.10053190968906	0.309875381373819	17.1627433142481
ENSG00000259225	LINC02345	long intergenic non-protein coding RNA 2345	lncRNA	Delta_over_HC	-1.69428708671494	0.10007408680983	3.63965379421021
ENSG00000259304	AC090888.2	5-azacytidine induced 2 (AZI2) pseudogene	processed_pseudogene	Delta_over_HC	-1.05423928263696	0.369356746254993	2.41737322809264
ENSG00000259332	ST20-MTHFS	ST20-MTHFS readthrough	protein_coding	Delta_over_HC	-1.0206330989255	0.218069298180196	15.8573569202491
ENSG00000259392	AC090877.1	microtubule-associated protein 1 light chain 3 beta 2 (MAP1LC3B2) pseudogene	transcribed_processed_pseudogene	Delta_over_HC	-2.64029313482736	0.0616658475783643	2.39536755256264
ENSG00000259520	SLC28A2-AS1	SLC28A2 antisense RNA 1	lncRNA	Delta_over_HC	-1.06068467103224	0.379090606308661	4.08336899097906
ENSG00000260549	MT1L	metallothionein 1L, pseudogene	transcribed_unprocessed_pseudogene	Delta_over_HC	-2.27590512064129	0.0559519905598305	8.84161855842453
ENSG00000260859	AC025280.1	novel transcript, sense intronic to CRISPLD2	lncRNA	Delta_over_HC	-1.26841027033936	0.167894166234908	7.73386208206914
ENSG00000261202	TNRC6B-DT	TNRC6B divergent transcript	lncRNA	Delta_over_HC	-1.18523174969556	0.113772243405282	5.43072339693167
ENSG00000261367	AC012645.2	novel transcript, antisense to GDPD3	lncRNA	Delta_over_HC	-1.27734127820609	0.0580972144275994	5.27573341574029
ENSG00000261407	AC013565.3	novel transcript, antisense to ABHD2	lncRNA	Delta_over_HC	-1.20836193640177	0.11664623830638	5.73745711343818
ENSG00000261449	AC103724.3	novel transcript, antisense to AP3M2	lncRNA	Delta_over_HC	-1.7181686573943	0.0637669373038832	16.051670169551
ENSG00000262898	AC139099.2	novel transcript	lncRNA	Delta_over_HC	-1.000735118414	0.326299186354809	3.87655308518423
ENSG00000263642	MIR4802	microRNA 4802	miRNA	Delta_over_HC	-1.15421100547929	0.0990738351979862	8.38583408168982
ENSG00000264160	MIR4762	microRNA 4762	miRNA	Delta_over_HC	-1.05838216430137	0.362436826462087	2.85856841208648
ENSG00000264204	AGAP7P	ArfGAP with GTPase domain, ankyrin repeat and PH domain 7, pseudogene	unprocessed_pseudogene	Delta_over_HC	-1.01200550465058	0.324995241715426	37.4188375246058
ENSG00000265218	AC103810.2	novel transcript, antisense to LRRC37A3	lncRNA	Delta_over_HC	-1.8060987085287	0.261301248831411	5.89689255989681
ENSG00000265888	DSCAS	DSC1/DSC2 antisense RNA	lncRNA	Delta_over_HC	-1.03363517587507	0.498718453743905	3.01857549419035
ENSG00000265929	MIR5195	microRNA 5195	miRNA	Delta_over_HC	-1.1511637333145	0.186532952429467	6.08693435471387
ENSG00000266458	MIR4259	microRNA 4259	miRNA	Delta_over_HC	-1.33745252553119	0.305607479427374	3.95960544701333
ENSG00000266718	AC079336.5	novel transcript, antisense MYO1D	lncRNA	Delta_over_HC	-1.54613940460799	0.329244517216836	2.61210517129087
ENSG00000266805	AP005432.1	novel transcript, sense intronic to RALBP1	lncRNA	Delta_over_HC	-1.02740338622273	0.0511805200894468	16.6072955784
ENSG00000267198	AC091132.4	novel transcript	lncRNA	Delta_over_HC	-1.38627429153695	0.370157179648915	3.2226734204421
ENSG00000267412	AC092068.2	novel transcript, sense intronic to GNG7	lncRNA	Delta_over_HC	-1.04446021811058	0.163535248836951	11.9044454337611
ENSG00000267453	CLEC4OP	C-type lectin domain family 4 member O, pseudogene	transcribed_unprocessed_pseudogene	Delta_over_HC	-1.295448967028	0.528765875557948	2.73042747925607
ENSG00000267769	AC011498.6	novel transcript, antisense to UBX6	lncRNA	Delta_over_HC	-1.27101641596453	0.0784920238623626	6.23884044387025
ENSG00000267892	AC022144.1	novel transcript, antisense to CAPN12	lncRNA	Delta_over_HC	-1.15390143563041	0.215780490325643	3.54079507795302
ENSG00000268170	AC073342.2	novel transcript, antisense to TAS2R40	lncRNA	Delta_over_HC	-1.23100448414807	0.207367954406384	34.1917418084739
ENSG00000268615	AL353803.5	novel transcript	lncRNA	Delta_over_HC	-1.03552278352415	0.358377675405216	3.25779216350533
ENSG00000268869	ESPNP	espin pseudogene	transcribed_unprocessed_pseudogene	Delta_over_HC	-1.61284764701117	0.220000911133022	2.97269876361212
ENSG00000270264	NDUFB8P2	NADH:ubiquinone oxidoreductase subunit B8 pseudogene 2	processed_pseudogene	Delta_over_HC	-1.44950225603813	0.178687531785715	3.4403912144285
ENSG00000270281	AC020910.3	zinc finger protein 134 pseudogene	processed_pseudogene	Delta_over_HC	-1.05472829487762	0.370157179648915	3.34928607414436
ENSG00000271344	AC018638.6	novel transcript	lncRNA	Delta_over_HC	-1.48947887927734	0.0989907245728127	3.22223331803725
ENSG00000271361	HTATSF1P2	HIV-1 Tat specific factor 1 pseudogene 2	processed_pseudogene	Delta_over_HC	-1.18443512612306	0.179294989254271	56.2260316269362
ENSG00000271806	AL590822.2	novel transcript, antisense PRKCZ	lncRNA	Delta_over_HC	-1.08990648983807	0.293667120951916	4.82912411844911
ENSG00000272186	VPS11-DT	VPS11 divergent transcript	lncRNA	Delta_over_HC	-1.02033677142205	0.486378739136341	2.39648265315007
ENSG00000272323	TTC23L-AS1	TTC23L antisense RNA 1	lncRNA	Delta_over_HC	-1.23680489147889	0.350786077443089	2.73565475798978
ENSG00000273203	AC006946.2	novel transcript	lncRNA	Delta_over_HC	-1.18522591256863	0.0901958388162073	6.75709296850019
ENSG00000273472	AC096733.2	novel transcript	lncRNA	Delta_over_HC	-1.17495576721478	0.0830724503251335	8.76448092046543
ENSG00000274051	AC005837.3		misc_RNA	Delta_over_HC	-1.02820789844845	0.1750096534873	9.04787486259917
ENSG00000274380	MIR6801	microRNA 6801	miRNA	Delta_over_HC	-1.04995947928759	0.427749603633954	2.59905747682683
ENSG00000275278	AC012150.2	novel transcript, antisense to FAR2	lncRNA	Delta_over_HC	-2.04163469006654	0.0563787128995863	3.28051694348265
ENSG00000275373	MIR6124	microRNA 6124	miRNA	Delta_over_HC	-1.089200901165	0.109577898270882	6.23041086225065
ENSG00000275519	MIR6804	microRNA 6804	miRNA	Delta_over_HC	-1.34424094666832	0.20117960998193	2.76031996485482
ENSG00000275772	AC244157.2	CMT1A duplicated region transcript 15-like 2 (CDRT15L2) pseudogene	processed_pseudogene	Delta_over_HC	-1.11367492269361	0.415986488584701	2.97522224371921
ENSG00000276105	AC021424.3		misc_RNA	Delta_over_HC	-1.05278018440936	0.0700663243185913	7.0237741342707
ENSG00000276386	CNTNAP3P2	CNTNAP3 pseudogene 2	unprocessed_pseudogene	Delta_over_HC	-3.53598416795005	0.24726659571365	5.07294819365208
ENSG00000276700	RNA5-8SN4	RNA, 5.8S ribosomal N4	rRNA	Delta_over_HC	-1.78222500760245	0.252190470141947	10.1391459561498
ENSG00000277117	FP565260.3	novel protein, similar to inducible T-cell co-stimulator ligand ICOSLG	protein_coding	Delta_over_HC	-1.70301878815186	0.0594382522157975	9.78739329283981
ENSG00000277654	AC087633.2	glioma tumor suppressor candidate region gene 2 (GLTSCR2) pseudogene	transcribed_processed_pseudogene	Delta_over_HC	-1.16352513952705	0.499690610886129	5.51656572983735
ENSG00000279057	AC141586.4	tec	TEC	Delta_over_HC	-1.17113872427105	0.371552320116005	3.49477766963644
ENSG00000279164	AL118508.2	TEC	TEC	Delta_over_HC	-1.40608792084964	0.0845608478333671	4.98772611832898
ENSG00000279204	AC134043.3	TEC	TEC	Delta_over_HC	-1.17867601624978	0.30183010858596	3.36657310109408
ENSG00000279208	CR381653.2	ankyrin repeat domain 18A (ANKRD18A) pseudogene	unprocessed_pseudogene	Delta_over_HC	-2.10628214332796	0.346307927255052	3.06175684751833
ENSG00000279518	AC083843.3	TEC	TEC	Delta_over_HC	-1.16477720581749	0.223491808272862	2.77455447690072
ENSG00000280136	AC240565.1	novel transcript	lncRNA	Delta_over_HC	-1.46294520802446	0.503386795058519	2.56783201952356
ENSG00000280159	AC016583.1	tec	TEC	Delta_over_HC	-1.16655908711222	0.072041256867864	5.86120340916678
ENSG00000281969	AL592158.1	TEC	TEC	Delta_over_HC	-2.03501688221509	0.366451998014392	5.50418481156567
ENSG00000282021	AC100810.3	novel transcript	lncRNA	Delta_over_HC	-1.06379583831528	0.346392208298473	2.78654897271978
ENSG00000282508	LINC01002	long intergenic non-protein coding RNA 1002	lncRNA	Delta_over_HC	-1.00402726878813	0.109327331595878	234.794056759801
ENSG00000282639	IGHV3-64D	immunoglobulin heavy variable 3-64D	IG_V_gene	Delta_over_HC	-2.57617162726301	0.13193444915015	25.4626602606516
ENSG00000283312	AC017104.3	GTF2I repeat domain containing 2(GTF2IRD2) pseudogene	processed_pseudogene	Delta_over_HC	-1.03125156625775	0.486475804215972	2.50603650761874
ENSG00000283399	AC004381.3	novel acyl-CoA synthetase medium-chain family member pseudogene	unprocessed_pseudogene	Delta_over_HC	-1.17904759419012	0.0629158410625457	19.4298877371956
ENSG00000283683	MYOCOS	myocilin opposite strand	protein_coding	Delta_over_HC	-1.06440828655384	0.454836918426629	2.67700495459317
ENSG00000284461	AC027644.4	novel transcript	protein_coding	Delta_over_HC	-2.06915274622211	0.237275256321818	2.45034913457292
ENSG00000285618	AC074132.1	novel transcript, antisense to ADGRV1	lncRNA	Delta_over_HC	-1.14656803963688	0.164041536938878	6.2659761352265
ENSG00000285897	AC004687.2	novel transcript	protein_coding	Delta_over_HC	-1.01776831063775	0.104244060537816	7.20348816392228
ENSG00000286186	AC018445.5	novel transcript, antisense to NFATC1	lncRNA	Delta_over_HC	-1.60315628644242	0.106945469091498	4.05154985528983
ENSG00000286379	AL591845.1	novel transcript	lncRNA	Delta_over_HC	-1.05941422754194	0.336814360008997	2.90092819390173
ENSG00000286533	AL078604.4	novel transcript	lncRNA	Delta_over_HC	-1.3298789815988	0.311742854545817	3.18534428711488
ENSG00000286546	AL079338.1	novel transcript, antisense to MACROD2	lncRNA	Delta_over_HC	-1.20823601509858	0.228606355205903	6.87087727056474
ENSG00000286705	AC079140.6	novel transcript	lncRNA	Delta_over_HC	-1.06287128951508	0.486046830305754	3.05920205775841
ENSG00000286887	AL355881.1	novel transcript, antisense to SGK1	lncRNA	Delta_over_HC	-1.27219977849678	0.198910466495963	6.75208583067396
ENSG00000286952	AC093928.1	novel transcript, antisense to DNAH12	lncRNA	Delta_over_HC	-1.03566858587591	0.342430293204344	2.74114135878731
ENSG00000287043	AL392083.2	novel transcript, sense intronic to ADARB2	lncRNA	Delta_over_HC	-1.26552542571108	0.725234190958907	2.45227178219279
ENSG00000287312	AC127526.4	novel transcript	lncRNA	Delta_over_HC	-1.20624180963648	0.292456849299193	3.33385471238472
ENSG00000287684	AL392172.1	novel transcript, antisense to FAM177B	lncRNA	Delta_over_HC	-1.36627602616592	0.112527737354553	5.67778639150626
ENSG00000288076	AC018398.1	novel transcript, antisense to MCPH1	lncRNA	Delta_over_HC	-1.13924803385284	0.454747676122922	2.89444692833465
ENSG00000288737		novel transcript	lncRNA	Delta_over_HC	-1.16082943430183	0.0777273587989963	23.9155099998324
ENSG00000288875		novel transcript	lncRNA	Delta_over_HC	-1.13893903345097	0.0588844435419433	184.727077423111
ENSG00000288885		novel transcript, antisense to SLC19A1	lncRNA	Delta_over_HC	-1.28866458634879	0.14321950197283	3.87404961746002
ENSG00000289013		novel transcript, sense intronic to SLC8A1	lncRNA	Delta_over_HC	-1.17549276450795	0.0923015718890312	107.169206861607
ENSG00000289062		novel transcript, antisense to IVL	lncRNA	Delta_over_HC	-1.29082066115337	0.420675063301503	5.27845242730329
ENSG00000289071		novel transcript	lncRNA	Delta_over_HC	-1.27842094633077	0.387825383498002	2.91145814347584
ENSG00000289074		novel transcript	lncRNA	Delta_over_HC	-1.17835390708022	0.0611864316226792	7.43744399930439
ENSG00000289164		novel transcript, sense intronic to RANBP10	lncRNA	Delta_over_HC	-1.06072084900402	0.0572756048358583	24.9590466876061
ENSG00000289167		novel transcript	lncRNA	Delta_over_HC	-1.1391328658183	0.417967377030753	2.96449270796934
ENSG00000289169		novel transcript	lncRNA	Delta_over_HC	-1.0060690179006	0.374268399187465	2.93713489237977
ENSG00000289259		novel transcript	lncRNA	Delta_over_HC	-1.34835849414965	0.0631456834335845	13.1487741979442
ENSG00000289298		novel transcript	lncRNA	Delta_over_HC	-1.1019853863366	0.0667912515166158	20.8056087429027
ENSG00000289383		novel transcript, antisense to CARD18	lncRNA	Delta_over_HC	-1.27133361105635	0.257045711526882	3.52036715060015
ENSG00000289636		novel transcript	lncRNA	Delta_over_HC	-2.03481424187231	0.211355895868265	3.33519851323677
