# Supplementary material for: Differential Type-I Interferon Response in Buffy Coat Transcriptome of Individuals Infected with SARS-CoV-2 Gamma and Delta Variants
Source: Int J Mol Sci. 2023 Aug 24;24(17):13146. doi: 10.3390/ijms241713146 (PMC10487928; doi:10.3390/ijms241713146)
Supplement: Supplementary file 1 [file ijms-24-13146-s001.zip › Supplementary table 5.xlsx]

## Sheet: Gamma up
Supplementary Table 5. Upregulated differentially expressed genes in Gamma transcriptome.				Expression
id ensembl	Gene name	Description	Gene Type	Contrast	log2fc	padj	abundance
ENSG00000211459	MT-RNR1	mitochondrially encoded 12S rRNA	Mt_rRNA	P1_over_HC	4.60437434377166	0.00118469941339149	620.624387665722
ENSG00000253818	IGLV1-41	immunoglobulin lambda variable 1-41 (pseudogene)	IG_V_pseudogene	P1_over_HC	3.51671758261371	0.0119949603139445	5.40422411966267
ENSG00000207175	RNU1-67P	RNA, U1 small nuclear 67, pseudogene	snRNA	P1_over_HC	3.38651845391156	0.0102503137815906	12.5486230317216
ENSG00000049247	UTS2	urotensin 2	protein_coding	P1_over_HC	3.28547135133921	0.00022422111995359	22.7582918985472
ENSG00000198732	SMOC1	SPARC related modular calcium binding 1	protein_coding	P1_over_HC	3.15979327322088	0.0028429988120197	4.3318023186168
ENSG00000238531	SNORD105B	small nucleolar RNA, C/D box 105B	snoRNA	P1_over_HC	2.69263348534739	0.0310359555127487	8.16063049900449
ENSG00000179593	ALOX15B	arachidonate 15-lipoxygenase type B	protein_coding	P1_over_HC	2.59671524179879	0.00246880790144415	14.2112109936566
ENSG00000206702	RNU1-11P	RNA, U1 small nuclear 11, pseudogene	snRNA	P1_over_HC	2.55903834443396	0.0034926166330543	23.1936959999092
ENSG00000204385	SLC44A4	solute carrier family 44 member 4	protein_coding	P1_over_HC	2.53917233204345	0.0094975682239926	7.80712477920425
ENSG00000211962	IGHV1-46	immunoglobulin heavy variable 1-46	IG_V_gene	P1_over_HC	2.53616318841343	2.45378695124323e-05	102.509593560498
ENSG00000207344	SNORA22C	small nucleolar RNA, H/ACA box 22C	snoRNA	P1_over_HC	2.50882811476844	0.0177226577529336	7.10089301068461
ENSG00000212135	SNORD67	small nucleolar RNA, C/D box 67	snoRNA	P1_over_HC	2.49872400131609	0.00265548391515782	90.9817650537992
ENSG00000167914	GSDMA	gasdermin A	protein_coding	P1_over_HC	2.47179084180112	0.0147150720646895	10.3985037966479
ENSG00000239607	RN7SL573P	RNA, 7SL, cytoplasmic 573, pseudogene	misc_RNA	P1_over_HC	2.46348749256715	0.0302842839443432	4.23078299014098
ENSG00000212607	SNORA3B	small nucleolar RNA, H/ACA box 3B	snoRNA	P1_over_HC	2.27168653872189	0.0124899812557655	177.127874712685
ENSG00000221716	SNORA11	small nucleolar RNA, H/ACA box 11	snoRNA	P1_over_HC	2.19524066660431	0.0212333996362316	66.7593151897221
ENSG00000211658	IGLV3-27	immunoglobulin lambda variable 3-27	IG_V_gene	P1_over_HC	2.11523318142827	0.00861756971196889	12.4451239086975
ENSG00000206596	RNU1-27P	RNA, U1 small nuclear 27, pseudogene	snRNA	P1_over_HC	2.07903755809089	0.0206697395124506	21.1151027604224
ENSG00000238961	SNORA47	small nucleolar RNA, H/ACA box 47	snoRNA	P1_over_HC	2.06376755155742	0.00507415255968906	19.8209362554417
ENSG00000253755	IGHGP	immunoglobulin heavy constant gamma P (non-functional)	IG_C_pseudogene	P1_over_HC	2.0553998915449	0.0479393579800015	56.7281872731667
ENSG00000225093	RPL3P7	ribosomal protein L3 pseudogene 7	processed_pseudogene	P1_over_HC	2.05168111061399	0.0205808685441755	9.34066734760464
ENSG00000226806	LCT-AS1	LCT antisense RNA 1	lncRNA	P1_over_HC	2.05092270044213	0.0401044510728814	3.60721542404286
ENSG00000206585	RNVU1-7	RNA, variant U1 small nuclear 7	snRNA	P1_over_HC	2.03784208145505	0.0010782238429625	33.5029793196248
ENSG00000232573	RPL3P4	ribosomal protein L3 pseudogene 4	processed_pseudogene	P1_over_HC	2.03246346859926	0.00579314048182796	43.7490718708937
ENSG00000124216	SNAI1	snail family transcriptional repressor 1	protein_coding	P1_over_HC	2.02850497240452	0.011883569021548	8.7405998122258
ENSG00000278099	RNVU1-2A	RNA, variant U1 small nuclear 2A	snRNA	P1_over_HC	2.00202654181295	0.0312590653761434	7.83484615713916
ENSG00000125968	ID1	inhibitor of DNA binding 1, HLH protein	protein_coding	P1_over_HC	1.99776156300991	0.0348560765124585	8.64913953397019
ENSG00000074181	NOTCH3	notch receptor 3	protein_coding	P1_over_HC	1.99302570739008	0.00782648762431469	7.39454488486676
ENSG00000210049	MT-TF	mitochondrially encoded tRNA-Phe (UUU/C)	Mt_tRNA	P1_over_HC	1.97901269752529	0.0453378704535311	6.25461127798964
ENSG00000223350	IGLV9-49	immunoglobulin lambda variable 9-49	IG_V_gene	P1_over_HC	1.96599784374693	0.00391028519557935	16.757153691077
ENSG00000222736	RNU4-6P	RNA, U4 small nuclear 6, pseudogene	snRNA	P1_over_HC	1.96061266194106	0.0423680288531124	14.7980798986501
ENSG00000207205	RNVU1-15	RNA, variant U1 small nuclear 15	snRNA	P1_over_HC	1.95827789271127	0.000358801009968745	17.6958093171615
ENSG00000200795	RNU4-1	RNA, U4 small nuclear 1	snRNA	P1_over_HC	1.95824069625435	0.00742419657270867	1973.35957160144
ENSG00000206588	RNU1-28P	RNA, U1 small nuclear 28, pseudogene	snRNA	P1_over_HC	1.95306328759999	0.0235391840009642	22.1128598276824
ENSG00000260035	AC051619.7	novel transcript	lncRNA	P1_over_HC	1.93067025722856	0.0141171864261565	5.12103591790889
ENSG00000277856	AC233755.2		protein_coding	P1_over_HC	1.9096668427057	0.00143678405454841	16.8088682217059
ENSG00000211890	IGHA2	immunoglobulin heavy constant alpha 2 (A2m marker)	IG_C_gene	P1_over_HC	1.90460518682577	0.000315111012598623	1496.04570497769
ENSG00000206634	SNORA22	small nucleolar RNA, H/ACA box 22	snoRNA	P1_over_HC	1.89045751886146	0.0286854565061921	31.4891268299108
ENSG00000225523	IGKV6D-21	immunoglobulin kappa variable 6D-21 (non-functional)	IG_V_gene	P1_over_HC	1.86455936853923	0.0185217860123778	4.14866851397867
ENSG00000262202	AC007952.4	novel transcript	lncRNA	P1_over_HC	1.86393490915676	0.0496596979712579	13.4234624553528
ENSG00000224650	IGHV3-74	immunoglobulin heavy variable 3-74	IG_V_gene	P1_over_HC	1.83327640286619	0.0131918044730898	112.973721286431
ENSG00000162062	TEDC2	tubulin epsilon and delta complex 2	protein_coding	P1_over_HC	1.83136004172259	0.0312905557000645	4.04735838293464
ENSG00000211659	IGLV3-25	immunoglobulin lambda variable 3-25	IG_V_gene	P1_over_HC	1.81405970421366	1.8005287635289e-05	82.541332502769
ENSG00000211639	IGLV4-60	immunoglobulin lambda variable 4-60	IG_V_gene	P1_over_HC	1.81297777178117	0.00752651617412596	9.89996248581736
ENSG00000239839	DEFA3	defensin alpha 3	protein_coding	P1_over_HC	1.8106813280588	0.017299787966448	81.2859112348336
ENSG00000101188	NTSR1	neurotensin receptor 1	protein_coding	P1_over_HC	1.80874102372228	0.00867250157371261	35.2664474666185
ENSG00000211652	IGLV7-43	immunoglobulin lambda variable 7-43	IG_V_gene	P1_over_HC	1.80704721096551	0.000164535526218403	28.8010952123511
ENSG00000105251	SHD	Src homology 2 domain containing transforming protein D	protein_coding	P1_over_HC	1.79824181101069	0.0119948572363262	5.9997268659305
ENSG00000124302	CHST8	carbohydrate sulfotransferase 8	protein_coding	P1_over_HC	1.77239741667273	0.0111545183708421	9.58861145437414
ENSG00000211959	IGHV4-39	immunoglobulin heavy variable 4-39	IG_V_gene	P1_over_HC	1.7657046557836	0.000285820763031893	167.750702818259
ENSG00000106078	COBL	cordon-bleu WH2 repeat protein	protein_coding	P1_over_HC	1.75099781119915	0.019890060298686	6.9572322192044
ENSG00000165507	DEPP1	DEPP1 autophagy regulator	protein_coding	P1_over_HC	1.74793772397345	0.025989784112528	13.2762252471238
ENSG00000200394	SNORA38B	small nucleolar RNA, H/ACA box 38B	snoRNA	P1_over_HC	1.74606468116218	0.035580623947081	40.3679597582039
ENSG00000170955	CAVIN3	caveolae associated protein 3	protein_coding	P1_over_HC	1.72751587613564	0.0228767555653045	6.55351223986987
ENSG00000124610	H1-1	H1.1 linker histone, cluster member	protein_coding	P1_over_HC	1.72727186349624	0.00825265175690417	6.62916581600396
ENSG00000211966	IGHV5-51	immunoglobulin heavy variable 5-51	IG_V_gene	P1_over_HC	1.72024105917201	1.29863342680132e-05	120.422879021635
ENSG00000202538	RNU4-2	RNA, U4 small nuclear 2	snRNA	P1_over_HC	1.71827678804155	0.0314983818637792	9541.23248631802
ENSG00000211650	IGLV5-45	immunoglobulin lambda variable 5-45	IG_V_gene	P1_over_HC	1.71148008361284	0.000230499696009668	15.8786826340583
ENSG00000174348	PODN	podocan	protein_coding	P1_over_HC	1.70768367095294	0.00782648762431469	20.2056986594186
ENSG00000142627	EPHA2	EPH receptor A2	protein_coding	P1_over_HC	1.68907232306811	0.0113827753824124	20.7567295271942
ENSG00000274576	IGHV2-70	immunoglobulin heavy variable 2-70	IG_V_gene	P1_over_HC	1.685808500978	0.00759772338954577	22.7039770848934
ENSG00000055957	ITIH1	inter-alpha-trypsin inhibitor heavy chain 1	protein_coding	P1_over_HC	1.68350487937183	0.0236274234829438	4.47290566494324
ENSG00000122386	ZNF205	zinc finger protein 205	protein_coding	P1_over_HC	1.68147145729673	0.0362525948884662	4.94907304639346
ENSG00000207445	SNORD15B	small nucleolar RNA, C/D box 15B	snoRNA	P1_over_HC	1.66842074555039	0.0282966608744083	676.733392852119
ENSG00000212195	U3	Small nucleolar RNA U3	snoRNA	P1_over_HC	1.63839230875324	0.0142740703992455	51.785071428039
ENSG00000162849	KIF26B	kinesin family member 26B	protein_coding	P1_over_HC	1.6346643267723	0.00705759422383625	17.6653362390587
ENSG00000175592	FOSL1	FOS like 1, AP-1 transcription factor subunit	protein_coding	P1_over_HC	1.63465294813932	0.0292655071024529	13.6914281675426
ENSG00000173262	SLC2A14	solute carrier family 2 member 14	protein_coding	P1_over_HC	1.62789885625965	0.0453880410842143	26.2752634028973
ENSG00000211637	IGLV4-69	immunoglobulin lambda variable 4-69	IG_V_gene	P1_over_HC	1.62353397222366	0.0093965052891378	42.4082852013411
ENSG00000211599	IGKV5-2	immunoglobulin kappa variable 5-2	IG_V_gene	P1_over_HC	1.60385363638293	0.0261953868680307	10.1473225246629
ENSG00000211973	IGHV1-69	immunoglobulin heavy variable 1-69	IG_V_gene	P1_over_HC	1.59642509006509	0.00746301499191203	14.2218386288293
ENSG00000139410	SDSL	serine dehydratase like	protein_coding	P1_over_HC	1.59478510546514	0.0182941206907152	9.84585500860224
ENSG00000208772	SNORD94	small nucleolar RNA, C/D box 94	snoRNA	P1_over_HC	1.59355154458154	0.0273550344259331	86.2391418053764
ENSG00000156966	B3GNT7	UDP-GlcNAc:betaGal beta-1,3-N-acetylglucosaminyltransferase 7	protein_coding	P1_over_HC	1.59234436572294	0.00706100239059707	101.297873250977
ENSG00000207475	SNORA80E	small nucleolar RNA, H/ACA box 80E	snoRNA	P1_over_HC	1.58207020341187	0.0317968747036672	48.8744315790623
ENSG00000158050	DUSP2	dual specificity phosphatase 2	protein_coding	P1_over_HC	1.54756448119872	0.00574754691238757	490.165849466145
ENSG00000275234	AC010503.5	novel transcript, antisense to DENND1C	lncRNA	P1_over_HC	1.53475362447232	0.0247753657358462	4.60649043593028
ENSG00000265100	AC005332.1	novel transcript, antisense to AMZ2	lncRNA	P1_over_HC	1.53187623981656	0.00802784602501812	19.2997508247766
ENSG00000211941	IGHV3-11	immunoglobulin heavy variable 3-11	IG_V_gene	P1_over_HC	1.52186790514134	0.00219900117271003	68.8010448065714
ENSG00000287190	AC239799.2	novel transcript	lncRNA	P1_over_HC	1.51465080204526	0.0328299524621835	4.85488068542839
ENSG00000211892	IGHG4	immunoglobulin heavy constant gamma 4 (G4m marker)	IG_C_gene	P1_over_HC	1.50358471088519	0.0147150720646895	129.778893701536
ENSG00000211951	IGHV2-26	immunoglobulin heavy variable 2-26	IG_V_gene	P1_over_HC	1.49433402176134	0.0188854671743372	13.7701445327555
ENSG00000201643	SNORA14A	small nucleolar RNA, H/ACA box 14A	snoRNA	P1_over_HC	1.49012618006933	0.0312590653761434	11.8054846551699
ENSG00000275898	AC125603.4	novel transcript	lncRNA	P1_over_HC	1.48603487749841	0.0183344829671624	13.3813632158459
ENSG00000107719	PALD1	phosphatase domain containing paladin 1	protein_coding	P1_over_HC	1.47118767324698	0.00579314048182796	11.5605436644462
ENSG00000186399	GOLGA8R	golgin A8 family member R	protein_coding	P1_over_HC	1.45105673524181	0.0340811916199342	12.3981841714954
ENSG00000198794	SCAMP5	secretory carrier membrane protein 5	protein_coding	P1_over_HC	1.4437287660099	0.000340182382764236	57.9231437077931
ENSG00000276953	TRBV12-4	T cell receptor beta variable 12-4	TR_V_gene	P1_over_HC	1.43729854183927	0.0312905557000645	26.5088016576534
ENSG00000117650	NEK2	NIMA related kinase 2	protein_coding	P1_over_HC	1.43671318922615	0.0247753657358462	13.6050936258043
ENSG00000267065	LINC02080	long intergenic non-protein coding RNA 2080	lncRNA	P1_over_HC	1.43277443877571	0.048175767022622	5.73402455296603
ENSG00000288943			lncRNA	P1_over_HC	1.41985113435142	0.0133836689467686	35.1995503543395
ENSG00000264940	SNORD3C	small nucleolar RNA, C/D box 3C	snoRNA	P1_over_HC	1.41659860255919	0.04463054681686	39.9486466914233
ENSG00000137474	MYO7A	myosin VIIA	protein_coding	P1_over_HC	1.40695661631205	0.0126884191085955	50.202898945843
ENSG00000211968	IGHV1-58	immunoglobulin heavy variable 1-58	IG_V_gene	P1_over_HC	1.40325859880199	0.042441259917784	6.36301902431297
ENSG00000255422	AP002954.1	novel transcript	lncRNA	P1_over_HC	1.39871637399078	0.0482315963544494	19.8190773439265
ENSG00000279602	AC109326.1	TEC	TEC	P1_over_HC	1.39713086355146	0.0204429133731632	129.093798084796
ENSG00000243238	IGKV2-30	immunoglobulin kappa variable 2-30	IG_V_gene	P1_over_HC	1.39525355960992	0.0121326808021293	54.5721704158943
ENSG00000266980	AC087289.1	novel transcript, antisense to UNK	lncRNA	P1_over_HC	1.38653477946518	0.0048481498016017	23.4295668483126
ENSG00000185585	OLFML2A	olfactomedin like 2A	protein_coding	P1_over_HC	1.38646899693478	0.0199512139522766	19.514217613847
ENSG00000240864	IGKV1-16	immunoglobulin kappa variable 1-16	IG_V_gene	P1_over_HC	1.37309261190652	8.57665744092392e-05	63.4693325968578
ENSG00000211942	IGHV3-13	immunoglobulin heavy variable 3-13	IG_V_gene	P1_over_HC	1.37058641138057	0.0295513516099275	16.9090223771559
ENSG00000123358	NR4A1	nuclear receptor subfamily 4 group A member 1	protein_coding	P1_over_HC	1.36879452222125	0.0497366580193642	220.735167901715
ENSG00000211625	IGKV3D-20	immunoglobulin kappa variable 3D-20	IG_V_gene	P1_over_HC	1.36106576014964	0.0453378704535311	12.6627091515854
ENSG00000171222	SCAND1	SCAN domain containing 1	protein_coding	P1_over_HC	1.3530593963065	0.00372733220461144	224.55305125567
ENSG00000186193	SAPCD2	suppressor APC domain containing 2	protein_coding	P1_over_HC	1.34605586296904	0.0147481784854657	28.1498586994022
ENSG00000275221	H2AC15	H2A clustered histone 15	protein_coding	P1_over_HC	1.34042220261761	0.00031048070652969	148.510520637814
ENSG00000107317	PTGDS	prostaglandin D2 synthase	protein_coding	P1_over_HC	1.33016008773236	0.0168928708223911	103.492661327547
ENSG00000174844	DNAH12	dynein axonemal heavy chain 12	protein_coding	P1_over_HC	1.32736770993212	0.0180188983547777	9.04578637214609
ENSG00000105697	HAMP	hepcidin antimicrobial peptide	protein_coding	P1_over_HC	1.32382044039937	0.038544038979046	4.29946588129428
ENSG00000206341	HLA-H	major histocompatibility complex, class I, H (pseudogene)	unprocessed_pseudogene	P1_over_HC	1.32054230375796	0.04090728369526	3263.52773652033
ENSG00000130748	TMEM160	transmembrane protein 160	protein_coding	P1_over_HC	1.31780873157385	0.0154878675986629	40.1623413924641
ENSG00000169184	MN1	MN1 proto-oncogene, transcriptional regulator	protein_coding	P1_over_HC	1.30813874033436	0.0156789096364419	18.0242574016877
ENSG00000180535	BHLHA15	basic helix-loop-helix family member a15	protein_coding	P1_over_HC	1.30480120967908	0.0117448797017925	43.25885045616
ENSG00000241360	PDXP	pyridoxal phosphatase	protein_coding	P1_over_HC	1.30327868858894	0.0297587690889953	9.80039204006588
ENSG00000183048	SLC25A10	solute carrier family 25 member 10	protein_coding	P1_over_HC	1.30207318246554	0.0111545183708421	6.67916047391873
ENSG00000238741	SCARNA7	small Cajal body-specific RNA 7	scaRNA	P1_over_HC	1.28854212973038	0.0113827753824124	465.68389415533
ENSG00000289126		novel transcript	lncRNA	P1_over_HC	1.28851074851242	0.0232117865029016	5.81692585378346
ENSG00000211950	IGHV1-24	immunoglobulin heavy variable 1-24	IG_V_gene	P1_over_HC	1.28246254986244	0.00717644252036896	17.3169345334823
ENSG00000239039	SNORD13	small nucleolar RNA, C/D box 13	snoRNA	P1_over_HC	1.28135976057878	0.0255773378963771	450.425074502207
ENSG00000244242	IFITM10	interferon induced transmembrane protein 10	protein_coding	P1_over_HC	1.28133965600062	0.00437431324608969	18.901816973203
ENSG00000081041	CXCL2	C-X-C motif chemokine ligand 2	protein_coding	P1_over_HC	1.26372754990584	0.0497362821452175	8.54229761199084
ENSG00000207088	SNORA7B	small nucleolar RNA, H/ACA box 7B	snoRNA	P1_over_HC	1.24946969178482	0.0401203595994213	94.1901381092437
ENSG00000113721	PDGFRB	platelet derived growth factor receptor beta	protein_coding	P1_over_HC	1.24860733053971	0.0131009292493621	141.382689458878
ENSG00000127329	PTPRB	protein tyrosine phosphatase receptor type B	protein_coding	P1_over_HC	1.24446310966883	0.0200176784473432	16.6376535129423
ENSG00000068137	PLEKHH3	pleckstrin homology, MyTH4 and FERM domain containing H3	protein_coding	P1_over_HC	1.23805455653877	0.0198060572530573	7.57553417336518
ENSG00000095739	BAMBI	BMP and activin membrane bound inhibitor	protein_coding	P1_over_HC	1.23619663084577	0.0300047050141092	16.8478548839513
ENSG00000170128	GPR25	G protein-coupled receptor 25	protein_coding	P1_over_HC	1.2347409799683	0.0302174818532621	16.2227519377788
ENSG00000267322	SNHG22	small nucleolar RNA host gene 22	lncRNA	P1_over_HC	1.22652280920909	0.00535336994212844	428.066175395243
ENSG00000141736	ERBB2	erb-b2 receptor tyrosine kinase 2	protein_coding	P1_over_HC	1.22558840763292	0.00847709556266205	264.396174596976
ENSG00000132386	SERPINF1	serpin family F member 1	protein_coding	P1_over_HC	1.22084621435417	0.00646536663006723	56.6454393944534
ENSG00000184925	LCN12	lipocalin 12	protein_coding	P1_over_HC	1.21672671974309	0.0264862574397145	5.8290683660043
ENSG00000211592	IGKC	immunoglobulin kappa constant	IG_C_gene	P1_over_HC	1.19912397838681	0.00430263062332635	6192.84700235144
ENSG00000158747	NBL1	NBL1, DAN family BMP antagonist	protein_coding	P1_over_HC	1.1968622268718	0.0217109071619917	20.7692346844483
ENSG00000159674	SPON2	spondin 2	protein_coding	P1_over_HC	1.1889592762604	0.0323779679132016	868.06596814342
ENSG00000161860	SYCE2	synaptonemal complex central element protein 2	protein_coding	P1_over_HC	1.18876819590641	0.0434568574570721	4.27656240802567
ENSG00000105374	NKG7	natural killer cell granule protein 7	protein_coding	P1_over_HC	1.17963655733466	0.00109536674437661	2323.13248412568
ENSG00000111249	CUX2	cut like homeobox 2	protein_coding	P1_over_HC	1.17566778996356	0.0447982560637567	31.9128068244664
ENSG00000167600	CYP2S1	cytochrome P450 family 2 subfamily S member 1	protein_coding	P1_over_HC	1.17270956369751	0.00725184064990883	68.9630021105223
ENSG00000020181	ADGRA2	adhesion G protein-coupled receptor A2	protein_coding	P1_over_HC	1.16306422050367	0.000759906162140603	88.923578735539
ENSG00000168209	DDIT4	DNA damage inducible transcript 4	protein_coding	P1_over_HC	1.16135738893611	0.0396241300516945	744.263639561179
ENSG00000211938	IGHV3-7	immunoglobulin heavy variable 3-7	IG_V_gene	P1_over_HC	1.15701640751429	0.0257487734894667	273.443511514891
ENSG00000168268	NT5DC2	5'-nucleotidase domain containing 2	protein_coding	P1_over_HC	1.15318579313732	0.00585374619013979	40.8540270806501
ENSG00000250479	CHCHD10	coiled-coil-helix-coiled-coil-helix domain containing 10	protein_coding	P1_over_HC	1.15061198382619	9.47886896444202e-06	137.425041407303
ENSG00000100453	GZMB	granzyme B	protein_coding	P1_over_HC	1.14601131805036	0.0158586596528321	1223.50459187488
ENSG00000180739	S1PR5	sphingosine-1-phosphate receptor 5	protein_coding	P1_over_HC	1.14328410743767	0.00646536663006723	536.170250931516
ENSG00000174482	LINGO2	leucine rich repeat and Ig domain containing 2	protein_coding	P1_over_HC	1.13915178733241	0.0348869122425658	15.3121301874156
ENSG00000161835	TAMALIN	trafficking regulator and scaffold protein tamalin	protein_coding	P1_over_HC	1.13870092044036	0.0212831590251095	83.342115365495
ENSG00000241484	ARHGAP8	Rho GTPase activating protein 8	protein_coding	P1_over_HC	1.13555470865961	0.0286915443758973	13.3768396694928
ENSG00000171812	COL8A2	collagen type VIII alpha 2 chain	protein_coding	P1_over_HC	1.13437200190685	0.00136759302900593	44.5099467834939
ENSG00000124575	H1-3	H1.3 linker histone, cluster member	protein_coding	P1_over_HC	1.12538235215953	0.00134596967233709	1328.49321705154
ENSG00000167136	ENDOG	endonuclease G	protein_coding	P1_over_HC	1.12538227140104	0.00331920708704099	38.4483421221114
ENSG00000174791	RIN1	Ras and Rab interactor 1	protein_coding	P1_over_HC	1.12210999178132	0.0270990982148143	107.396442803545
ENSG00000272502	AC104958.2	novel transcript	lncRNA	P1_over_HC	1.12196183003446	0.00167760015449063	27.4599892182895
ENSG00000227262	HCG4B	HLA complex group 4B	unprocessed_pseudogene	P1_over_HC	1.12116028278308	0.0364399770999597	10.6013137302927
ENSG00000204396	VWA7	von Willebrand factor A domain containing 7	protein_coding	P1_over_HC	1.12022028064932	0.00794664399272135	23.9681687903103
ENSG00000179862	CITED4	Cbp/p300 interacting transactivator with Glu/Asp rich carboxy-terminal domain 4	protein_coding	P1_over_HC	1.11587949050354	0.00808805813662661	56.4605931226546
ENSG00000142544	CTU1	cytosolic thiouridylase subunit 1	protein_coding	P1_over_HC	1.10964175040437	0.00233384723270427	64.7758641493521
ENSG00000185909	KLHDC8B	kelch domain containing 8B	protein_coding	P1_over_HC	1.10494792314794	0.0284556538955263	120.839765732191
ENSG00000100024	UPB1	beta-ureidopropionase 1	protein_coding	P1_over_HC	1.0845098299289	0.00618148170805905	83.953209583909
ENSG00000137135	ARHGEF39	Rho guanine nucleotide exchange factor 39	protein_coding	P1_over_HC	1.07755011971332	0.0383788012953455	6.51227666087673
ENSG00000260708	TBC1D22A-DT	TBC1D22A divergent transcript	lncRNA	P1_over_HC	1.07614529926115	0.0474333285096944	17.9903289340447
ENSG00000259065	AC005520.2	novel transcript, antisense to C14orf43	lncRNA	P1_over_HC	1.07217639720735	0.00190024059009721	16.8479481726208
ENSG00000248487	ABHD14A	abhydrolase domain containing 14A	protein_coding	P1_over_HC	1.06611559782019	0.00263063097381395	50.3111589181775
ENSG00000073111	MCM2	minichromosome maintenance complex component 2	protein_coding	P1_over_HC	1.06489827924579	5.28840463621771e-05	159.1665088391
ENSG00000271855	AC073195.1	novel transcript	lncRNA	P1_over_HC	1.06488059609884	0.0255338492172284	8.59485238621216
ENSG00000198715	GLMP	glycosylated lysosomal membrane protein	protein_coding	P1_over_HC	1.06377045732725	5.28840463621771e-05	237.340135185993
ENSG00000105270	CLIP3	CAP-Gly domain containing linker protein 3	protein_coding	P1_over_HC	1.06321087908237	0.0266935541198984	16.4965673880078
ENSG00000225194	LINC00092	long intergenic non-protein coding RNA 92	lncRNA	P1_over_HC	1.06319177558694	0.0477527045603783	12.7025749941872
ENSG00000239224	RN7SL546P	RNA, 7SL, cytoplasmic 546, pseudogene	misc_RNA	P1_over_HC	1.0619363828704	0.0482446465943383	124.499246761033
ENSG00000135736	CCDC102A	coiled-coil domain containing 102A	protein_coding	P1_over_HC	1.06086248746908	0.000421975434291815	75.4183288945365
ENSG00000123989	CHPF	chondroitin polymerizing factor	protein_coding	P1_over_HC	1.06080623616026	0.00208518818684259	64.90655131297
ENSG00000241351	IGKV3-11	immunoglobulin kappa variable 3-11	IG_V_gene	P1_over_HC	1.05111971854386	0.0217277197575255	230.259603248799
ENSG00000242887	IGHJ3	immunoglobulin heavy joining 3	IG_J_gene	P1_over_HC	1.05024821610625	0.0363866671550687	13.4928487063503
ENSG00000101213	PTK6	protein tyrosine kinase 6	protein_coding	P1_over_HC	1.05012728750503	0.0419967740987899	11.4647533191515
ENSG00000287126	AC108488.3	novel transcript	lncRNA	P1_over_HC	1.04990384894178	0.0122519119735787	16.1930011564164
ENSG00000168298	H1-4	H1.4 linker histone, cluster member	protein_coding	P1_over_HC	1.04494366518886	0.00369935163766708	1099.20673582258
ENSG00000232434	AJM1	apical junction component 1 homolog	protein_coding	P1_over_HC	1.04451415635071	0.00831128564609637	136.919590264124
ENSG00000134824	FADS2	fatty acid desaturase 2	protein_coding	P1_over_HC	1.04363023635037	0.028331137420932	169.77284691935
ENSG00000073861	TBX21	T-box transcription factor 21	protein_coding	P1_over_HC	1.04244246314197	0.0081048081999148	951.016714648896
ENSG00000266074	BAHCC1	BAH domain and coiled-coil containing 1	protein_coding	P1_over_HC	1.03848592268852	8.32657157522538e-05	107.53761568937
ENSG00000134780	DAGLA	diacylglycerol lipase alpha	protein_coding	P1_over_HC	1.03763927417184	0.000205992810823643	71.9365014617569
ENSG00000137726	FXYD6	FXYD domain containing ion transport regulator 6	protein_coding	P1_over_HC	1.03674115057868	0.0160034692321261	66.8107929728721
ENSG00000168496	FEN1	flap structure-specific endonuclease 1	protein_coding	P1_over_HC	1.03623414023099	0.000118454650225483	90.0146926799948
ENSG00000100321	SYNGR1	synaptogyrin 1	protein_coding	P1_over_HC	1.02694132461812	0.0286854565061921	81.046237663513
ENSG00000184545	DUSP8	dual specificity phosphatase 8	protein_coding	P1_over_HC	1.02393538532788	0.0153954400040197	63.5438598330426
ENSG00000211767	TRBJ2-3	T cell receptor beta joining 2-3	TR_J_gene	P1_over_HC	1.02266410132122	0.0361282623732446	22.632434198451
ENSG00000184270	H2AC21	H2A clustered histone 21	protein_coding	P1_over_HC	1.01545504378849	0.00851582297555499	144.330696725024
ENSG00000065054	SLC9A3R2	SLC9A3 regulator 2	protein_coding	P1_over_HC	1.0123290646396	0.0142320750314916	13.8165465106656
ENSG00000170209	ANKK1	ankyrin repeat and kinase domain containing 1	protein_coding	P1_over_HC	1.00567136846021	0.0365258700036466	8.74349335982848
ENSG00000214274	ANG	angiogenin	protein_coding	P1_over_HC	1.00490760077897	0.0254569306012858	12.4295703662699
