# Supplementary material for: Differential Type-I Interferon Response in Buffy Coat Transcriptome of Individuals Infected with SARS-CoV-2 Gamma and Delta Variants
Source: Int J Mol Sci. 2023 Aug 24;24(17):13146. doi: 10.3390/ijms241713146 (PMC10487928; doi:10.3390/ijms241713146)
Supplement: Supplementary file 1 [file ijms-24-13146-s001.zip › Supplementary table 6.xlsx]

## Sheet: Gamma down
Supplementary Table 6. Downregulated differentially expressed genes in Gamma transcriptome.				Expression
id ensembl	Gene name	Description	Gene Type	Contrast	log2fc	padj	abundance
ENSG00000002726	AOC1	amine oxidase copper containing 1	protein_coding	P1_over_HC	-1.65027025791734	0.324903526503882	26.9727925725862
ENSG00000004939	SLC4A1	solute carrier family 4 member 1 (Diego blood group)	protein_coding	P1_over_HC	-1.17174506369278	0.165842366864941	8548.37158031863
ENSG00000021645	NRXN3	neurexin 3	protein_coding	P1_over_HC	-1.22630898073363	0.262723667813035	20.8272074912982
ENSG00000053108	FSTL4	follistatin like 4	protein_coding	P1_over_HC	-1.24468090466186	0.0871024952883759	9.45260121372068
ENSG00000062370	ZNF112	zinc finger protein 112	protein_coding	P1_over_HC	-1.07541714902683	0.165748893579842	4.43452752814669
ENSG00000096696	DSP	desmoplakin	protein_coding	P1_over_HC	-1.73306144948123	0.270157371318849	87.6091919086667
ENSG00000100362	PVALB	parvalbumin	protein_coding	P1_over_HC	-1.13517319273996	0.222823483829642	14.2984158259376
ENSG00000103056	SMPD3	sphingomyelin phosphodiesterase 3	protein_coding	P1_over_HC	-1.54252681575715	0.0522415497060453	326.293635910574
ENSG00000103355	PRSS33	serine protease 33	protein_coding	P1_over_HC	-1.76683106664373	0.199003106947037	96.892267096188
ENSG00000105205	CLC	Charcot-Leyden crystal galectin	protein_coding	P1_over_HC	-1.26760576322503	0.157173932295104	854.149213057155
ENSG00000105366	SIGLEC8	sialic acid binding Ig like lectin 8	protein_coding	P1_over_HC	-1.75833064684774	0.146441767998867	88.9355832221505
ENSG00000109099	PMP22	peripheral myelin protein 22	protein_coding	P1_over_HC	-1.49893230675679	0.0943639257728469	21.3005156102331
ENSG00000109339	MAPK10	mitogen-activated protein kinase 10	protein_coding	P1_over_HC	-1.07887240952015	0.329886858351572	13.3072801915164
ENSG00000111058	ACSS3	acyl-CoA synthetase short chain family member 3	protein_coding	P1_over_HC	-1.11741653659341	0.0702948982222707	127.053596701031
ENSG00000111837	MAK	male germ cell associated kinase	protein_coding	P1_over_HC	-1.18897078109349	0.0554472554402741	268.424944369945
ENSG00000112299	VNN1	vanin 1	protein_coding	P1_over_HC	-1.26263772445579	0.0666323566423329	483.716365656124
ENSG00000113296	THBS4	thrombospondin 4	protein_coding	P1_over_HC	-1.42858835919377	0.0938518434489352	11.0806205202084
ENSG00000113916	BCL6	BCL6 transcription repressor	protein_coding	P1_over_HC	-1.03008948475887	0.0514709147090421	4756.24977555545
ENSG00000120217	CD274	CD274 molecule	protein_coding	P1_over_HC	-1.32912911016785	0.0589600007970954	382.043133303641
ENSG00000123700	KCNJ2	potassium inwardly rectifying channel subfamily J member 2	protein_coding	P1_over_HC	-1.20378677834121	0.0590760021214794	1377.14867239592
ENSG00000124102	PI3	peptidase inhibitor 3	protein_coding	P1_over_HC	-1.3616931615934	0.241977302936612	260.404460932348
ENSG00000124785	NRN1	neuritin 1	protein_coding	P1_over_HC	-1.2009933905587	0.155956551242853	8.99247521435893
ENSG00000126603	GLIS2	GLIS family zinc finger 2	protein_coding	P1_over_HC	-1.50907332646487	0.0500402082464089	5.52118471031183
ENSG00000127578	WFIKKN1	WAP, follistatin/kazal, immunoglobulin, kunitz and netrin domain containing 1	protein_coding	P1_over_HC	-1.00481432318838	0.199259288471733	7.45616280390529
ENSG00000128253	RFPL2	ret finger protein like 2	protein_coding	P1_over_HC	-1.06626287251066	0.253985455150336	4.02372739082933
ENSG00000133488	SEC14L4	SEC14 like lipid binding 4	protein_coding	P1_over_HC	-1.12419685621717	0.15759745778024	18.2200142983868
ENSG00000133687	TMTC1	transmembrane O-mannosyltransferase targeting cadherins 1	protein_coding	P1_over_HC	-1.89341110766564	0.115465272939462	99.8774548457652
ENSG00000137267	TUBB2A	tubulin beta 2A class IIa	protein_coding	P1_over_HC	-1.87659988531721	0.152026564770988	326.818872374877
ENSG00000137757	CASP5	caspase 5	protein_coding	P1_over_HC	-1.6117665775753	0.074787462664598	242.383093430391
ENSG00000138772	ANXA3	annexin A3	protein_coding	P1_over_HC	-1.55582740651822	0.0683611141819352	720.59185331681
ENSG00000143036	SLC44A3	solute carrier family 44 member 3	protein_coding	P1_over_HC	-1.16413035231204	0.131517731967652	3.94507336426311
ENSG00000143546	S100A8	S100 calcium binding protein A8	protein_coding	P1_over_HC	-1.02445870287358	0.0760917010474338	19915.6872017671
ENSG00000144331	ZNF385B	zinc finger protein 385B	protein_coding	P1_over_HC	-1.66060396607469	0.271789851548199	4.2659340706699
ENSG00000145555	MYO10	myosin X	protein_coding	P1_over_HC	-1.04307086140949	0.144515156481504	50.7715347663065
ENSG00000147570	DNAJC5B	DnaJ heat shock protein family (Hsp40) member C5 beta	protein_coding	P1_over_HC	-1.14684179722895	0.121340084450686	4.03417514767759
ENSG00000148926	ADM	adrenomedullin	protein_coding	P1_over_HC	-1.10517071675139	0.126417637507284	646.398433678822
ENSG00000149256	TENM4	teneurin transmembrane protein 4	protein_coding	P1_over_HC	-1.56631764584182	0.0709320288520338	8.63981233772256
ENSG00000151726	ACSL1	acyl-CoA synthetase long chain family member 1	protein_coding	P1_over_HC	-1.00187491514652	0.157801797524154	11564.1016643871
ENSG00000154736	ADAMTS5	ADAM metallopeptidase with thrombospondin type 1 motif 5	protein_coding	P1_over_HC	-1.2847575025648	0.148607578427997	12.0598881247933
ENSG00000157404	KIT	KIT proto-oncogene, receptor tyrosine kinase	protein_coding	P1_over_HC	-1.01602063111414	0.0742955644266788	38.9914537940601
ENSG00000163959	SLC51A	solute carrier family 51 subunit alpha	protein_coding	P1_over_HC	-1.01874236949713	0.369814434117613	5.54923601063668
ENSG00000164176	EDIL3	EGF like repeats and discoidin domains 3	protein_coding	P1_over_HC	-1.00994011021528	0.542488881829014	4.0901062707732
ENSG00000164741	DLC1	DLC1 Rho GTPase activating protein	protein_coding	P1_over_HC	-1.04848822697819	0.312002836187941	24.3204487344093
ENSG00000167034	NKX3-1	NK3 homeobox 1	protein_coding	P1_over_HC	-1.01476892837882	0.242334705216074	55.6684988743174
ENSG00000167100	SAMD14	sterile alpha motif domain containing 14	protein_coding	P1_over_HC	-1.01681856945467	0.0838445485053999	29.7979399834725
ENSG00000167676	PLIN4	perilipin 4	protein_coding	P1_over_HC	-1.15430564940051	0.0933914614853908	151.330553728496
ENSG00000168874	ATOH8	atonal bHLH transcription factor 8	protein_coding	P1_over_HC	-1.04216199161541	0.315757521286046	18.7231905351101
ENSG00000169439	SDC2	syndecan 2	protein_coding	P1_over_HC	-1.15754342284917	0.124571750024612	22.2005815933197
ENSG00000169507	SLC38A11	solute carrier family 38 member 11	protein_coding	P1_over_HC	-1.16401728749343	0.156260333715142	19.4235846729296
ENSG00000171236	LRG1	leucine rich alpha-2-glycoprotein 1	protein_coding	P1_over_HC	-1.11873352879089	0.0825951238825222	999.677392997016
ENSG00000175894	TSPEAR	thrombospondin type laminin G domain and EAR repeats	protein_coding	P1_over_HC	-2.42058033326417	0.0726730916217652	6.14260376122092
ENSG00000177181	RIMKLA	ribosomal modification protein rimK like family member A	protein_coding	P1_over_HC	-1.26233286462913	0.145287147041524	4.05532831343224
ENSG00000183019	MCEMP1	mast cell expressed membrane protein 1	protein_coding	P1_over_HC	-1.27233165170726	0.228395794432312	209.829161248032
ENSG00000183134	PTGDR2	prostaglandin D2 receptor 2	protein_coding	P1_over_HC	-1.35985090578363	0.058356819256354	158.60029273608
ENSG00000184304	PRKD1	protein kinase D1	protein_coding	P1_over_HC	-1.32405633505441	0.25281012588255	3.6470625595814
ENSG00000184557	SOCS3	suppressor of cytokine signaling 3	protein_coding	P1_over_HC	-1.12658663047765	0.167853874660433	1584.40366441659
ENSG00000187554	TLR5	toll like receptor 5	protein_coding	P1_over_HC	-1.14316445370441	0.0870865348867073	642.00772068994
ENSG00000188013	MEIS3P2	Meis homeobox 3 pseudogene 2	processed_pseudogene	P1_over_HC	-1.50341834603073	0.138301783641912	3.96320459067088
ENSG00000188487	INSC	INSC spindle orientation adaptor protein	protein_coding	P1_over_HC	-1.19666810141096	0.320580465491851	6.03993475446777
ENSG00000196167	COLCA1	colorectal cancer associated 1	lncRNA	P1_over_HC	-1.17200720346224	0.0969019514024416	6.4859297662722
ENSG00000196517	SLC6A9	solute carrier family 6 member 9	protein_coding	P1_over_HC	-1.11659854292481	0.0596058821152157	86.8152910506388
ENSG00000197256	KANK2	KN motif and ankyrin repeat domains 2	protein_coding	P1_over_HC	-1.09820182962693	0.0738543974623022	143.043357977287
ENSG00000197301	HMGA2-AS1	HMGA2 antisense RNA 1	lncRNA	P1_over_HC	-1.1463521819635	0.207285194853362	5.99350553426829
ENSG00000197594	ENPP1	ectonucleotide pyrophosphatase/phosphodiesterase 1	protein_coding	P1_over_HC	-1.13425092504947	0.0741104649979499	6.66533205839122
ENSG00000197993	KEL	Kell metallo-endopeptidase (Kell blood group)	protein_coding	P1_over_HC	-1.11957767107096	0.0592963829816905	67.7950018369668
ENSG00000200063	AC061992.1		snoRNA	P1_over_HC	-1.11548406341301	0.179740988519213	5.0893655775258
ENSG00000202019	Y_RNA	Y RNA	misc_RNA	P1_over_HC	-1.10322499571642	0.24074728601592	4.83266003099917
ENSG00000204110	LINC02520	long intergenic non-protein coding RNA 2520	lncRNA	P1_over_HC	-1.10559905204774	0.339074227627047	31.160866325296
ENSG00000204815	ODAD4	outer dynein arm docking complex subunit 4	protein_coding	P1_over_HC	-1.23569394544183	0.0540016493410821	9.24259931877388
ENSG00000204860	FAM201A	family with sequence similarity 201 member A	lncRNA	P1_over_HC	-1.05995971524525	0.155792502688497	5.76592804108763
ENSG00000204936	CD177	CD177 molecule	protein_coding	P1_over_HC	-2.52600003491162	0.155776870959532	455.301487845506
ENSG00000205056	LINC02397	long intergenic non-protein coding RNA 2397	lncRNA	P1_over_HC	-1.00260417275086	0.0543737371320891	116.787872660748
ENSG00000205126	ACCSL	1-aminocyclopropane-1-carboxylate synthase homolog (inactive) like	protein_coding	P1_over_HC	-1.36539701741549	0.237555925822492	5.40142802596565
ENSG00000205918	PDPK2P	3-phosphoinositide dependent protein kinase 2, pseudogene	transcribed_unprocessed_pseudogene	P1_over_HC	-1.68252357524423	0.175367349734491	5.33438379195306
ENSG00000207042	RNU6-196P	RNA, U6 small nuclear 196, pseudogene	snRNA	P1_over_HC	-1.04783017518469	0.118538978027328	5.74830188171414
ENSG00000211891	IGHE	immunoglobulin heavy constant epsilon	IG_C_gene	P1_over_HC	-1.41549955432619	0.184469855475119	11.580234959334
ENSG00000212371	AF111168.1		snoRNA	P1_over_HC	-1.02201017149017	0.143956514623649	4.09689822468976
ENSG00000220842	RPL21P16	ribosomal protein L21 pseudogene 16	processed_pseudogene	P1_over_HC	-1.10658082922487	0.117689170527958	5.59223259866752
ENSG00000221265	MIR1255A	microRNA 1255a	miRNA	P1_over_HC	-1.0483155708807	0.110057145679017	5.03177144127323
ENSG00000221855	TAS2R41	taste 2 receptor member 41	protein_coding	P1_over_HC	-1.35594798910996	0.165777546261928	3.91714120893986
ENSG00000223779	AC239800.1	novel pseudogene, similar to phosphodiesterase 4D interacting protein PDE4DIP	unprocessed_pseudogene	P1_over_HC	-1.05443015091628	0.639759745259483	6.34142037779413
ENSG00000224067	AL354877.1	pseudogene similar to part of HLA-B associated transcript 2 (BAT2)	processed_pseudogene	P1_over_HC	-2.12549576504707	0.079369662011826	6.30983563073587
ENSG00000225231	LINC02470	long intergenic non-protein coding RNA 2470	lncRNA	P1_over_HC	-1.56649984034439	0.23529959016486	26.9331145003398
ENSG00000225345	SNX18P3	sorting nexin 18 pseudogene 3	transcribed_unprocessed_pseudogene	P1_over_HC	-1.11382889653313	0.110787369223038	10.262067072007
ENSG00000225963	AC009950.1	novel transcript, antisense to SP110	lncRNA	P1_over_HC	-1.04258952622653	0.110057145679017	4.82770556676878
ENSG00000226571	AL592429.2	novel transcript	lncRNA	P1_over_HC	-1.15547091345511	0.0526354899445703	7.28835502905333
ENSG00000228495	LINC01013	long intergenic non-protein coding RNA 1013	lncRNA	P1_over_HC	-1.03845550719251	0.188015274567963	12.9896091552646
ENSG00000228541	AC093159.1	novel transcript	lncRNA	P1_over_HC	-1.05553887643512	0.103388635888787	12.9828463229006
ENSG00000229314	ORM1	orosomucoid 1	protein_coding	P1_over_HC	-1.63900586091973	0.05686716456477	22.0005052698321
ENSG00000229992	HMGB3P9	high mobility group box 3 pseudogene 9	processed_pseudogene	P1_over_HC	-1.10778741704922	0.0893231784437809	4.06740449919808
ENSG00000230666	CEACAM22P	CEA cell adhesion molecule 22, pseudogene	transcribed_unprocessed_pseudogene	P1_over_HC	-1.81200099781279	0.516084839845871	7.12895129196429
ENSG00000231969	MMADHC-DT	MMADHC divergent transcript	lncRNA	P1_over_HC	-1.11102019399384	0.12810988790671	3.60905812227249
ENSG00000232187	FTH1P7	ferritin heavy chain 1 pseudogene 7	processed_pseudogene	P1_over_HC	-1.18746114175768	0.0757242627264515	5.46373961018896
ENSG00000233559	LINC00513	long intergenic non-protein coding RNA 513	lncRNA	P1_over_HC	-1.02328063655961	0.321010647819495	7.18921181548797
ENSG00000234493	RHOXF1P1	Rhox homeobox family member 1 pseudogene 1	transcribed_unprocessed_pseudogene	P1_over_HC	-1.40018906808442	0.0664389014161162	12.2304286265368
ENSG00000234572	LINC01800	long intergenic non-protein coding RNA 1800	lncRNA	P1_over_HC	-1.16402823551983	0.0604841530165138	8.56563244706607
ENSG00000235321	AC007556.1	novel transcript	lncRNA	P1_over_HC	-1.01992755613389	0.11449723062402	16.8811546699312
ENSG00000236297	AC048351.1	eukaryotic translation elongation factor 1 alpha 1 (EEF1A1) pseudogene	transcribed_processed_pseudogene	P1_over_HC	-1.17856180665835	0.155814472407845	4.46240755130929
ENSG00000236397	DDX11L2	DEAD/H-box helicase 11 like 2 (pseudogene)	unprocessed_pseudogene	P1_over_HC	-1.04031102393622	0.20580592594674	18.2176196116056
ENSG00000236438	FAM157A	family with sequence similarity 157 member A	transcribed_unprocessed_pseudogene	P1_over_HC	-1.22148338980801	0.078472946551191	265.300842112975
ENSG00000237980	LINC02773	long intergenic non-protein coding RNA 2773	lncRNA	P1_over_HC	-1.15285270783847	0.22292366735885	3.74585267886043
ENSG00000237990	CNTN4-AS1	CNTN4 antisense RNA 1	lncRNA	P1_over_HC	-1.33305017262296	0.225739463888876	4.34237993237685
ENSG00000240661	AC063952.1	novel V-set domain-containing pseudogene	transcribed_unitary_pseudogene	P1_over_HC	-4.87473479477504	0.159422233217665	6.46682367877063
ENSG00000241612	AC114728.1	ribosomal protein L21 (RPL21) pseudogene	processed_pseudogene	P1_over_HC	-1.00715511637696	0.151463220163994	5.14478417149467
ENSG00000241860	AL627309.5	novel transcript	lncRNA	P1_over_HC	-1.29006576237518	0.0560863910012764	49.6600290603594
ENSG00000243273	AC020636.1	novel transcript	lncRNA	P1_over_HC	-1.46409429178108	0.270295104444835	25.1400133685075
ENSG00000245888	NSMCE1-DT	NSMCE1 divergent transcript	lncRNA	P1_over_HC	-1.06317173580991	0.0540016493410821	11.3948472081062
ENSG00000248455	LINC02217	long intergenic non-protein coding RNA 2217	lncRNA	P1_over_HC	-1.32935217495983	0.180288282527311	6.90510320668609
ENSG00000250057	AC114781.2	novel transcript	lncRNA	P1_over_HC	-1.03029644574712	0.057701266698246	7.01837993127697
ENSG00000250151	ARPC4-TTLL3	ARPC4-TTLL3 readthrough	protein_coding	P1_over_HC	-1.20556189985591	0.0646045404055759	5.33611032251011
ENSG00000250240	AC008840.1	novel transcript	lncRNA	P1_over_HC	-1.33013436975506	0.154973033253818	4.43990728540495
ENSG00000250696	AC111000.4	novel transcript, antisense to UGT2B11	lncRNA	P1_over_HC	-1.18761087928723	0.292832647870371	77.6917413600249
ENSG00000252050	AL606748.2		snoRNA	P1_over_HC	-1.22857629759245	0.083354017977055	4.95993623248345
ENSG00000252062	RNU6-469P	RNA, U6 small nuclear 469, pseudogene	snRNA	P1_over_HC	-1.25414686993695	0.296251277369715	4.14360652403909
ENSG00000252103	RNU6-917P	RNA, U6 small nuclear 917, pseudogene	snRNA	P1_over_HC	-1.06001953894357	0.2150013698433	3.91682546539972
ENSG00000252908	RNU6-1003P	RNA, U6 small nuclear 1003, pseudogene	snRNA	P1_over_HC	-1.03793103199221	0.167744873105968	24.8173972732316
ENSG00000254288	AC087672.2	novel transcript	lncRNA	P1_over_HC	-1.0161974126766	0.132008854792712	15.9468142274996
ENSG00000254500	RANP3	RAN pseudogene 3	processed_pseudogene	P1_over_HC	-1.00167030156944	0.12856812361064	4.06100285679287
ENSG00000254708	MMADHCP2	MMADHC pseudogene 2	processed_pseudogene	P1_over_HC	-1.03636860861519	0.169720137904424	6.76346270788871
ENSG00000255325	AC108136.1	novel transcript	lncRNA	P1_over_HC	-1.08607405961481	0.156397956896588	4.82717614257163
ENSG00000255398	HCAR3	hydroxycarboxylic acid receptor 3	protein_coding	P1_over_HC	-1.00885421296533	0.105217613921067	748.243517421457
ENSG00000256347	OR8R1P	olfactory receptor family 8 subfamily R member 1 pseudogene	unprocessed_pseudogene	P1_over_HC	-1.36259320065204	0.131199512274378	6.42418276431894
ENSG00000256812	CAPNS2	calpain small subunit 2	protein_coding	P1_over_HC	-1.08555380037549	0.0838445485053999	14.9876010711244
ENSG00000257017	HP	haptoglobin	protein_coding	P1_over_HC	-1.38379577799039	0.067645593764255	37.6176022695582
ENSG00000257322	AC138123.1	novel transcript, antisense to novel protein	lncRNA	P1_over_HC	-1.21938231630945	0.0947035298429603	10.8602388514016
ENSG00000257743	MGAM2	maltase-glucoamylase 2 (putative)	protein_coding	P1_over_HC	-1.25020760724431	0.130081609732626	261.428913359177
ENSG00000258101	AC010173.1	novel transcript, antisense to TUBA1C	lncRNA	P1_over_HC	-1.09813742310936	0.056315020053996	41.3042960469294
ENSG00000258215	AC078886.1	tripartite motif containing 61 (TRIM61) pseudogene	processed_pseudogene	P1_over_HC	-1.14847034652562	0.117667365717983	12.5982095429168
ENSG00000258760	AL355076.2	novel transcript	lncRNA	P1_over_HC	-1.22563144595347	0.127112285679953	5.33175933900679
ENSG00000259182	AC019254.1	novel transcript	lncRNA	P1_over_HC	-1.32835129724585	0.163228812220996	23.7837172337349
ENSG00000259278	AC087878.1	novel transcript	lncRNA	P1_over_HC	-1.3746094554828	0.0752607570388717	4.52998799610387
ENSG00000259418	AC091117.2	novel transcript, antisense to SORD	lncRNA	P1_over_HC	-1.25714049821578	0.118931691903294	6.85580220754887
ENSG00000260645	AL359715.2	novel transcript	lncRNA	P1_over_HC	-1.10547050688112	0.132008854792712	3.62525096549151
ENSG00000260861	AL049634.2	novel protein, SIRPB1-SIRPD readthrough	protein_coding	P1_over_HC	-1.02293369031521	0.0568850944704333	10.8381388961681
ENSG00000261618	LINC02605	long intergenic non-protein coding RNA 2605	lncRNA	P1_over_HC	-1.00547993459238	0.118811690541374	9.47786764814085
ENSG00000264695	AC007922.1	novel transcript	lncRNA	P1_over_HC	-1.23409965500714	0.183078718343161	5.25744550796974
ENSG00000264937	AC100830.2	novel transcript, antisense to ornithine decarboxylase antizyme 2 OAZ2	lncRNA	P1_over_HC	-1.00010668357011	0.20817290263385	3.7949213893226
ENSG00000267060	PTGES3L	prostaglandin E synthase 3 like	protein_coding	P1_over_HC	-1.02528981368838	0.137277049469881	5.09978909114946
ENSG00000267452	LINC02073	long intergenic non-protein coding RNA 2073	lncRNA	P1_over_HC	-1.51280984455436	0.285628963860983	6.82454539505218
ENSG00000267711	AC060766.6	novel transcript	lncRNA	P1_over_HC	-1.24452876907892	0.0969976542769337	4.64811171186752
ENSG00000267895	AC063977.1	sialic acid binding Ig-like lectin 19, pseudogene	transcribed_unprocessed_pseudogene	P1_over_HC	-1.03124258849856	0.102389223336754	6.78862176340558
ENSG00000268117	VN1R84P	vomeronasal 1 receptor 84 pseudogene	unprocessed_pseudogene	P1_over_HC	-1.17353312652342	0.224190566916143	4.3436669766959
ENSG00000268555	AC123912.4	novel transcript	lncRNA	P1_over_HC	-1.09485104201858	0.14371019312678	217.541905545878
ENSG00000268758	ADGRE4P	adhesion G protein-coupled receptor E4, pseudogene	transcribed_unprocessed_pseudogene	P1_over_HC	-1.49822229303347	0.104001954081453	160.683933511621
ENSG00000269385	AC020895.1	egf-like module containing, mucin-like, hormone receptor-like 1 (EMR1) pseudogene	unprocessed_pseudogene	P1_over_HC	-1.30170994420852	0.164333926666771	5.65115061028017
ENSG00000269887	AL391001.1	novel transcript, sense intronic to PBX1	lncRNA	P1_over_HC	-1.25521316896234	0.0510631214581183	11.662886108187
ENSG00000270133	AC025766.1	novel transcript, sense intronic to C5orf36	lncRNA	P1_over_HC	-1.24807519793073	0.069224144649077	7.65717005542588
ENSG00000271304	DPRXP2	divergent-paired related homeobox pseudogene 2	transcribed_processed_pseudogene	P1_over_HC	-1.20360857313005	0.248249269582544	9.04008724597303
ENSG00000272567	AC109347.2	novel transcript	lncRNA	P1_over_HC	-1.31965950799134	0.107286751802112	4.04653494916236
ENSG00000272963	OR7A19P	olfactory receptor family 7 subfamily A member 19 pseudogene	unprocessed_pseudogene	P1_over_HC	-1.42079228782392	0.179524948178419	3.66175015933773
ENSG00000274173	AL035661.1	novel transcript	lncRNA	P1_over_HC	-1.10354521448122	0.375488204620807	47.9716153500914
ENSG00000275210	AC245884.11	novel transcript	lncRNA	P1_over_HC	-1.07463383265601	0.0680568476296241	58.8785274988154
ENSG00000276390	AC004241.3	novel transcript, sense intronic to RPAP3	lncRNA	P1_over_HC	-1.02344120293042	0.0660762176517258	6.33468082151775
ENSG00000279693	AC099521.3	novel transcript	TEC	P1_over_HC	-1.41297559946827	0.0897271139199755	36.575289040308
ENSG00000281128	PTENP1-AS	PTENP1 antisense RNA	lncRNA	P1_over_HC	-1.10257350435994	0.069224144649077	6.46483185054792
ENSG00000283222	MIR4433A	microRNA 4433a	miRNA	P1_over_HC	-1.21637826883762	0.128485681202628	5.24640710656831
ENSG00000283378	CNTNAP3C	contactin associated protein family member 3C	protein_coding	P1_over_HC	-1.31504189170005	0.157150886968361	13.5987384877465
ENSG00000283529	AL035685.1	somatomedin B and thrombospondin type 1 domain containing (SBSPON) pseudogene	transcribed_unprocessed_pseudogene	P1_over_HC	-1.63144530650892	0.0555802587633762	3.79868179034336
ENSG00000285933	AP003498.2	novel transcript	lncRNA	P1_over_HC	-1.19057919453188	0.328158257115716	4.75642244265223
ENSG00000286151	AL732406.1	SLAM family member 5-like pseudogene	unprocessed_pseudogene	P1_over_HC	-2.04826627590413	0.0610264230649329	5.00548290079351
ENSG00000286579	AC023483.1	novel transcript, antisense to SETMAR	lncRNA	P1_over_HC	-1.04890611931408	0.106541679839861	6.44320922837931
ENSG00000286691	AL590009.1	novel transcript	lncRNA	P1_over_HC	-1.20394864914545	0.0526772779407362	8.17634183589641
ENSG00000287193	AC132938.7	novel transcript	lncRNA	P1_over_HC	-1.05876747956509	0.120768697059952	14.033928785126
ENSG00000287338	AL929091.1	novel transcript	lncRNA	P1_over_HC	-1.24567727024933	0.187881613257903	5.51874096288435
ENSG00000287778	AC006230.1	novel transcript, antisense to HS3ST1	lncRNA	P1_over_HC	-1.09389986594778	0.0944633119405962	26.8044612361779
ENSG00000287913	AL132986.1	novel transcript	lncRNA	P1_over_HC	-1.3496076142098	0.130292881807455	3.86496414950039
ENSG00000288043	AC006511.6	novel transcript	lncRNA	P1_over_HC	-1.02999270507516	0.202755629530117	6.77979415779264
ENSG00000288740		novel transcript	lncRNA	P1_over_HC	-1.47549201911546	0.103430962145703	3.86015377679972
ENSG00000288992		novel transcript, sense intronic to SLC8A1	lncRNA	P1_over_HC	-1.17077022005118	0.0589600007970954	9.62742194454847
ENSG00000289172		novel transcript	lncRNA	P1_over_HC	-1.59765890495172	0.0747417363689035	125.275539654579
ENSG00000289263		novel transcript	lncRNA	P1_over_HC	-1.06832059304542	0.309449738600941	4.72733984917746
ENSG00000289327		novel transcript, antisense to DYSF	lncRNA	P1_over_HC	-1.62066327657954	0.0946747476536368	7.68494470381806
ENSG00000289371		novel transcript	lncRNA	P1_over_HC	-1.35506031841421	0.0518191991827977	10.6878840472973
ENSG00000289444		novel transcript	lncRNA	P1_over_HC	-1.46200009368564	0.146768757360567	5.54016582927427
